# Supplementary material for: Evidence-based digital support during 1 year after an Interdisciplinary Pain Rehabilitation Programme for persons with chronic musculoskeletal pain to facilitate a sustainable return to work: a study protocol for a registry-based multicentre randomised controlled trial
Source: PubMed Central journal article supplement — BMJ Open. 2022 Apr 25;12(4):e060452. doi: 10.1136/bmjopen-2021-060452 (PMC9039404; doi:10.1136/bmjopen-2021-060452), 2022-04-25
Supplement: bmjopen-2021-060452.draft_revisions.pdf [file bmjopen-2021-060452.draft_revisions.pdf]

# BMJ Open

BMJ Open is committed to open peer review. As part of this commitment we make the peer review history of every article we publish publicly available.

When an article is published we post the peer reviewers' comments and the authors' responses online. We also post the versions of the paper that were used during peer review. These are the versions that the peer review comments apply to.

The versions of the paper that follow are the versions that were submitted during the peer review process. They are not the versions of record or the final published versions. They should not be cited or distributed as the published version of this manuscript.

BMJ Open is an open access journal and the full, final, typeset and author-corrected version of record of the manuscript is available on our site with no access controls, subscription charges or pay-per-view fees (<http://bmjopen.bmj.com>).

If you have any questions on BMJ Open's open peer review process please email [info.bmjopen@bmj.com](mailto:info.bmjopen@bmj.com)

# BMJ Open

**An evidence-based digital support during one year after an Interdisciplinary Pain Rehabilitation Program for persons with chronic musculoskeletal pain to facilitate a sustainable return to work: a study protocol for a registry-based multicentre randomized controlled trial.**

|                               |                                                                                                                                                                                                                                                                                                                                                                                                                                                                                                |
|-------------------------------|------------------------------------------------------------------------------------------------------------------------------------------------------------------------------------------------------------------------------------------------------------------------------------------------------------------------------------------------------------------------------------------------------------------------------------------------------------------------------------------------|
| Journal:                      | <i>BMJ Open</i>                                                                                                                                                                                                                                                                                                                                                                                                                                                                                |
| Manuscript ID                 | bmjopen-2021-060452                                                                                                                                                                                                                                                                                                                                                                                                                                                                            |
| Article Type:                 | Protocol                                                                                                                                                                                                                                                                                                                                                                                                                                                                                       |
| Date Submitted by the Author: | 22-Dec-2021                                                                                                                                                                                                                                                                                                                                                                                                                                                                                    |
| Complete List of Authors:     | Turesson, Christina; Linköping University Department of Health Medicine and Caring Sciences<br>Liedberg, Gunilla; Linköping University Department of Health Medicine and Caring Sciences<br>Vixner, Linda; Dalarna University, School of Health and Welfare<br>Lofgren, Monika; Karolinska Institutet, Department of Clinical Sciences and Department of Rehabilitation Medicine Danderyd Hospital<br>Björk, Mathilda ; Linköping University Department of Health Medicine and Caring Sciences |
| Keywords:                     | Clinical trials < THERAPEUTICS, PAIN MANAGEMENT, REHABILITATION MEDICINE                                                                                                                                                                                                                                                                                                                                                                                                                       |
|                               |                                                                                                                                                                                                                                                                                                                                                                                                                                                                                                |

SCHOLARONE™  
Manuscripts

**TITLE**

An evidence-based digital support during one year after an Interdisciplinary Pain Rehabilitation Program for persons with chronic musculoskeletal pain to facilitate a sustainable return to work: a study protocol for a registry-based multicentre randomized controlled trial.

**AUTHORS**

Christina Turesson<sup>1</sup>, Gunilla Liedberg<sup>1</sup>, Linda Vixner<sup>2</sup>, Monika Löfgren<sup>3</sup>, Mathilda Björk<sup>4</sup>

**Affiliations:**

1. Division of Prevention, Rehabilitation and Community Medicine, Department of Health, Medicine and Caring Sciences, Linköping University, Linköping, Sweden
2. School of Health and Welfare, Dalarna University, Falun, Sweden
3. Karolinska Institutet, Department of Clinical Sciences and Department of Rehabilitation Medicine Danderyd Hospital, 182 88 Stockholm
4. Pain and Rehabilitation Centre, Department of Health, Medicine and Caring Sciences, Linköping University, Linköping, Sweden

**Corresponding author:**

Christina Turesson

Department of Health, Medicine and Caring Sciences

Division of Prevention, Rehabilitation and Community Medicine

Unit of Occupational therapy

601 74 Norrköping

1  
2  
3 SWEDEN  
4

5 [christina.turesson@liu.se](mailto:christina.turesson@liu.se)  
6

7  
8 +46 11363602  
9

10  
11  
12  
13  
14  
15 **Word count: 3864**  
16  
17

18  
19  
20  
21  
22  
23  
24  
25  
26  
27  
28  
29  
30  
31  
32  
33  
34  
35  
36  
37  
38  
39  
40  
41  
42  
43  
44  
45  
46  
47  
48  
49  
50  
51  
52  
53  
54  
55  
56  
57  
58  
59  
60

For peer review only

## ABSTRACT

### Introduction

Chronic musculoskeletal pain (CMSP) severely affects the individual's quality of life, functioning and ability to work, and comes with significant societal costs for sick leave and productivity loss. After rehabilitation, patients with CMSP often experience lack of support when responsibility for the return to work (RTW) process is taken over by the employer.

Therefore, we aim to evaluate the effectiveness of a digital support (SWEPPPE) for promoting a sustainable RTW for persons with CMSP and to facilitate the employers' supportive role and responsibilities in the process. The features in SWEPPPE are anchored in earlier research.

### Methods and analysis

In this registry-based multicentre randomized controlled trial, 360 patients with CMSP will be randomised to either receive the smart phone application SWEPPPE (n=180) or to a control group (n=180). The intervention group will use SWEPPPE for one year and the control group will not receive any intervention for RTW. Participants will be recruited from approximately ten specialist and primary care level units connected to the Swedish National Quality Registry for Pain Rehabilitation (SQRP) providing Interdisciplinary Pain Rehabilitation programs (IPRP) for CMSP. Eligibility criteria are age 18-65 years and a need for support in RTW or continued support at work for creating a sustainable work situation. Baseline data will be collected when the participants have completed the IPRP. Final assessment will be performed after twelve months. The primary outcome will be number of days with sickness cash benefit. Secondary outcomes and explanatory variables including important domains affected by CMSP such as health-related quality of life, functioning and work ability will be collected.

### Ethics and dissemination

1  
2  
3 The Swedish Ethics Review Board approved the study (Dnr 2020-01593, Dnr 2021-01854).

4  
5 The study findings will be disseminated through publication, national and international  
6  
7 conferences, and meetings to be available for patients, health care providers or stakeholders.  
8  
9

### 10 **Registration details**

11  
12 ClinicalTrials.gov registration number NCT05058547 (Pre-results, not yet recruiting). Version  
13  
14 1. 27 September 2021.  
15  
16

### 17 **Strengths and limitations of this study**

- 18  
19
- 20 • Using a shared smartphone application (SWEPPE) to facilitate self-management, and  
21 communication and collaboration between persons with CMSP and their employer  
22 during the return-to-work process is a novel intervention with the potential to support a  
23 sustainable work situation.  
24  
25
  - 26 • A registry-based multicentre randomized trial will provide rigorous evidence regarding  
27 clinical effectiveness of the intervention  
28  
29
  - 30 • In this trial the primary and secondary outcomes are based on recommendation from  
31 the Swedish Social Insurance Agency regarding outcomes for return-to-work which  
32 ensures capturing relevant aspects of sick-leave.  
33  
34
  - 35 • It is important to be aware of the risk for selection bias due to patients' self-confidence  
36 or willingness to use smartphone applications.  
37  
38  
39  
40  
41  
42  
43  
44  
45  
46  
47

48 **Key words:** clinical trials, musculoskeletal disorders, pain management, rehabilitation  
49  
50 medicine.  
51  
52  
53  
54  
55  
56  
57  
58  
59  
60

## INTRODUCTION

Chronic musculoskeletal pain (CMSP) (i.e., pain duration >3 months) such as chronic neck/shoulder and back pain or generalized widespread pain (including fibromyalgia (FM)) has a prevalence from 10.4%[1] to 20% among adults.[1-3] CMSP negatively impact quality of life, functioning and the ability to work.[2] CMSP also causes considerable costs for the society in terms of sick leave expenses and loss of productivity.[1,2,4-8] Many patients with CMSP participate in Interdisciplinary Pain Rehabilitation Programs (IPRP) to enable self-management of pain and increase the ability to work.[9-11] After completing a rehabilitation program for persons with CMSP the patients can experience lack of support when the employer takes over the responsibility for the return to work (RTW) process.[12] The employers have a crucial role in a successful RTW process[13-15] but may lack knowledge regarding chronic pain and its consequences[16] and how to support the employee with CMSP in the best way during RTW.[12] Barriers for RTW for persons with CMSP are for example lack of support at the workplace, not finding the right fit between the employee's physical abilities and work tasks, or problems with relationships with supervisors or coworkers.[17,18] Key factors for a successful RTW are communication and collaboration between the employer and the employee.[19] Further, employers also need to use active listening skills which means enhancing conversation using open questions and demonstrate effective listening by summary statements.[20] To facilitate the important interaction between employer and employee[21,22] a shared smartphone application may be a tool for increasing a successful outcome in the RTW process.

A primary aim of IPRP is to reach RTW.[9,10] To fill the gap patients with CMSP experience when the RTW process continues after completing IPRP,[12] the digital support A Sustainable WorkEr- digital support for Persons with chronic Pain and their Employers

1  
2  
3 (SWEPEPE) was systematically developed.[23] SWEPEPE is a smartphone application for  
4  
5 persons with CMSP with the possibility to invite and share information with the employer.  
6  
7 SWEPEPE was developed by a multidisciplinary project team consisting of health care  
8  
9 researchers, a user representative, and a software team. A user-centred agile approach[24] was  
10  
11 used with continuous involvement of two reference groups consisting of persons with CMSP  
12  
13 and employers providing feedback on the functions and the interface in SWEPEPE. Smart  
14  
15 phone applications as digital support has shown promising results for persons with chronic  
16  
17 pain[25-27] and can be helpful especially in an out-clinic setting.[28] They are easily  
18  
19 accessed, can enable management of the condition[29], and reduce pain interference.[30] An  
20  
21 evidence-based content and a simple design are key parts for providing a successful digital  
22  
23 support.[31] Information provided via apps can improve the level of knowledge among  
24  
25 patients.[32] Focusing on self-management and empowerment are other important parts of  
26  
27 successful digital support.[32] Self-management among persons with chronic pain include  
28  
29 self-monitoring[31,34] and pain education in relation to the neuroscience of pain, medication,  
30  
31 stress, depression, and sleep management.[35] Self-monitoring can contribute to learning  
32  
33 about consequences of actions and behaviours in daily life.[36] This can lead to making  
34  
35 changes in daily activities and a sense of control and motivation for continued use of self-  
36  
37 management strategies.[37,38]  
38  
39  
40  
41  
42  
43  
44  
45  
46

47 Although positive effects of digital support have been shown there are limitations related to  
48  
49 low overall quality of smartphone apps for CMSP and lack of rigorous assessment of their  
50  
51 effectiveness.[39,40] SWEPEPE was found to be useful for self-management for persons with  
52  
53 CMSP and for supporting employers, with relevant content, logical and easy to use, and with  
54  
55 a nice and clean interface.[23] However, the clinical effectiveness of SWEPEPE as a digital  
56  
57 support for employees and employers to decrease sick leave in persons with CMSP need to be  
58  
59  
60



1  
2  
3 investigated. The aim of this paper is to report the study design, aim, outcome assessment and  
4  
5 procedures for a planned registry based multicentre randomized controlled trial (R-RCT). The  
6  
7 overall objective of the R-RCT is to evaluate the clinical effectiveness of a digital support  
8  
9 (SWEPEPE) for promoting a sustainable RTW for persons with CMSP and to facilitate the  
10  
11 employers' supportive role and responsibilities in the process.  
12  
13  
14  
15  
16

## 17 **METHODS AND ANALYSIS**

### 18 **Trial design and study setting**

19  
20 This protocol is reported in accordance with the Standard Protocol Items: Recommendations  
21  
22 for Interventional Trials (SPIRIT).[41] The R-RCT will conform with the Consolidated  
23  
24 Standards of Reporting Trials (CONSORT).[42,43] This is a two-armed multi-centre  
25  
26 registry-based randomized controlled trial. The study will be conducted in specialized and  
27  
28 primary level clinics in Sweden providing IPRP and reporting to the Swedish National  
29  
30 Quality Registry for Pain Rehabilitation (SQRP). Approximately 360 (n=180 intervention  
31  
32 group, n=180 control group) patients with CMSP will be recruited to participate in the study.  
33  
34 Study design and enrolment details is presented in figure 1. A completed SPIRIT checklist  
35  
36 and the World Health Organization (WHO) trial registration data set[44] can be found in the  
37  
38 additional files (S1, S2).  
39  
40  
41  
42  
43  
44  
45  
46  
47

### 48 **Patient and public involvement**

49  
50 Patients with CMSP were not involved in formulating the research question or setting the  
51  
52 research design for the planned study. However, patients with CMSP who had undergone  
53  
54 IPRP and employers participated in design and development of the intervention, the digital  
55  
56 smart phone application SWEPEPE. In addition, a user representative from the Swedish  
57  
58  
59  
60

1  
2  
3 Rheumatism Association participated as a research partner in the development process of  
4  
5 SWEPPPE.[23]  
6  
7  
8  
9

### 10 **Eligibility criteria**

11  
12 Patients entering the trial must have completed an IPRP for CMSP. The principal inclusion  
13  
14 criteria for IPRP in Sweden are persistent or intermittent pain lasting  $\geq 3$  months, pain  
15  
16 affecting daily activities to a large extent, completed systematic assessment and non-  
17  
18 pharmacological optimization is completed, and screening for psychosocial risk factors and  
19  
20 differential diagnosis completed. In this trial, patients with CMSP will be recruited based on  
21  
22 the following criteria: age between 18-65 years, completed IPRP at any of the participating  
23  
24 units, having an employment to return to after IPRP or having returned to work but need  
25  
26 continued support for creating a sustainable work situation after IPRP. Patients who have  
27  
28 completed IPRP but are unemployed or unable to return to work will be excluded.  
29  
30  
31  
32  
33  
34  
35  
36  
37  
38  
39  
40  
41  
42  
43  
44  
45  
46  
47  
48  
49  
50  
51  
52  
53  
54  
55  
56  
57  
58  
59  
60

### 36 **Recruitment**

#### 39 *Units*

40  
41 Units in specialized and primary care level in Sweden providing IPRP based on individualized  
42  
43 needs and who are reporting to the SQRP will be included in the study. Two of the  
44  
45 researchers (CT, MB) will invite healthcare staff (primarily occupational therapists and  
46  
47 physiotherapists but also psychologist/counselor, nurses etc.) at the participating units to  
48  
49 online digital information meetings to present the study. A contact person will be appointed at  
50  
51 each unit. One researcher (CT) will have continuous contact with the participating units  
52  
53 regarding the planned IPRP groups and screening of eligible patients for the study.  
54  
55  
56  
57  
58  
59  
60

#### 60 *Participants*

1  
2  
3 Patients with CMSP participating in IPRP at any of the study units and who is meeting the  
4 inclusion criteria will be asked to take part in the study. The recruitment process will start  
5  
6 with screening of eligible participants in the IPRP groups. Screening of eligible participants  
7  
8 will be performed by the unit coordinators and health care staff providing the IPRP and will  
9  
10 be discussed with one of the researchers (CT). The health care staff will collect contact details  
11  
12 and information regarding previous sick leave during one year before starting IPRP from the  
13  
14 eligible participants and ask for permission to provide this information to the researchers. The  
15  
16 participants will at the end of IPRP receive verbal and written information about the study  
17  
18 from one of the researchers (CT) and written informed consent will be collected for those  
19  
20 willing to participate in the study. The participants will receive detailed information regarding  
21  
22 voluntary participation and the right to withdraw from the study at any time.  
23  
24  
25  
26  
27  
28  
29  
30

### 31 **Sample size**

32  
33 The null hypothesis in this trial is that there will be no difference between the intervention  
34  
35 group and the control group concerning the primary outcome sick leave. Based on previous  
36  
37 research regarding sick leave[45,46] and the inclusion of participants with the goal to RTW,  
38  
39 an estimated difference between the groups of 20 net days and an effect-size of 0.333 was set  
40  
41 for rejection of the null hypothesis. To detect this difference with a power of 80% and a  
42  
43 significance level of 0.05 a total sample size of approximately 300 participants (150/group)  
44  
45 are needed. With an allowance for 20% of participants lost to follow-up we aim to recruit a  
46  
47 total sample size of 360 participants (n=180 intervention, n=180 control). To reach the target  
48  
49 sample size, participants will be recruited from multiple special and primary care level health  
50  
51 care providing IPRP for patients with chronic pain.  
52  
53  
54  
55  
56  
57  
58

### 59 **Allocation/Randomization**

1  
2  
3 The unit of randomization will be the individual participants who have approved to participate  
4 in the study. One of the researchers (CT) will enrol and randomize participants who have  
5 given informed consent to participate in the study to either the intervention or control group.  
6  
7 As sick leave history is a strong predictor for future sick leave[47] participants will be  
8 stratified based on self-reported number of sick leave days during the year before IPRP.  
9  
10 Participants will be divided in high (total number of gross sick leave days  $\geq 70$ ) or low sick  
11 leave absence[47] and then randomized to intervention or control group. Allocation of the  
12 participants to intervention or control group will be conducted using a block randomization  
13 design with varying block sizes of 2-6.[48-50] The allocation sequence will be computer  
14 generated and sealed sequentially numbered opaque sealed envelopes will be prepared by one  
15 of the researchers (GL).  
16  
17  
18  
19  
20  
21  
22  
23  
24  
25  
26  
27  
28  
29  
30

### 31 **Blinding**

32  
33 Due to the nature of the intervention the participants will not be blinded to group allocation.  
34  
35 As randomization to intervention or control group is performed at the completion of IPRP the  
36 participants will not have further contact with the health care staff responsible for IPRP or  
37 other patients. However, the participants will also be instructed by the unit coordinator not to  
38 reveal their group allocation to the health care staff responsible for IPRP or other patients if  
39 they would have further contact.  
40  
41  
42  
43  
44  
45  
46  
47  
48  
49

### 50 **Intervention**

51  
52 Participants randomized to the intervention group will receive the smartphone application  
53 SWEPPE to use as a digital support during the RTW process. SWEPPE consist of six  
54 modules to support self-management:[33] the action plan, daily self-rating of health aspects,  
55 self-monitoring graphs of health aspects and goals, the coach, the library, and shared  
56  
57  
58  
59  
60

1  
2  
3 information with the employer. The action plan includes setting a work-related goal,  
4  
5 identification of barriers for RTW, strategies to handle the barriers, identification of support  
6  
7 needed from the employer, and weekly evaluation. SWEPPPE address pain education[35] and  
8  
9 the library provides evidence-based information about CMSP, self-management strategies,  
10  
11 and information and tools for RTW.  
12  
13

14  
15 The intervention starts after completed IPRP with self-rating of work conditions and goal  
16  
17 setting in SWEPPPE. The participants will use SWEPPPE for 12 months. Data registered in  
18  
19 SWEPPPE by the participant about their goal, work condition and self-rating will be stored in  
20  
21 the application and used for self-monitoring and visualizing progress for the participant. The  
22  
23 participant invites his/her employer/employers to access the web application SWEPPPE  
24  
25 depending on what information the participant wants to share with the employer. The  
26  
27 employer will receive e-mail reminders to use SWEPPPE.  
28  
29  
30  
31  
32

### 33 **Control**

34  
35 Participants randomized to the control group will follow the regular procedure at any specific  
36  
37 unit. As there is no standardized intervention for RTW after IPRP, that will mean that the  
38  
39 participants follow their planned RTW process without further support from the IPRP team.  
40  
41 However, the patient can initiate and seek other types of health care or support during their  
42  
43 RTW process based on their needs.  
44  
45  
46  
47  
48  
49

### 50 **Outcomes**

51  
52 Outcome assessments in the present trial are intended to capture the complexity of pain[51]  
53  
54 based on the biopsychosocial model[52] namely medical, psychological and social (total life  
55  
56 situation) factors impacting on the work situation. It has been recommended to include  
57  
58  
59  
60

multiple outcomes in clinical trials for persons with CMSP to capture important domains affected by symptoms such as functioning and health-related quality of life.[53,54]

The primary and secondary outcomes are collected for evaluation of the clinical effectiveness of SWEPPE, and the complementary variables will be collected based on their effect on the outcome. Personal characteristics of the participants will be collected from the SQRP for specialist and primary care respectively and from supplementary questions regarding sex, age, education, currently working/studying (yes, no), work importance in addition to the importance of income (Five alternatives: 1) Very important, 2) Important, 3) Partially important, 4) Hardly no importance, or 5) No importance), diagnosis and pain duration, sick leave during one year before IPRP, and type of work.

### ***Primary outcomes***

Primary outcome is days with sickness cash benefit measured according to the Swedish Social Insurance Agency's (SSIA) proposal of outcome measures of return to work:[55]

- Number of gross and net days with sickness cash benefit during the follow-up period (mean and median values).

### ***Secondary outcomes***

Secondary outcomes will be collected from SSIA, the SQRP for specialist and primary care respectively, supplementary questionnaires and SWEPPE. An overview of the outcome assessments and data sources is presented in table 1.

Table 1. Overview of the study period, measurement time points (t), primary and secondary outcome assessments and explanatory variables, and data sources (*italics*).

| Time point | Study period    |             |                 |                |
|------------|-----------------|-------------|-----------------|----------------|
|            | Enroll-ment     | Alloca-tion | Post-allocation |                |
|            | -t <sub>1</sub> | 0           | Base-line       | t <sub>1</sub> |
| Enrollment | X               |             |                 |                |

|    |                                                                                                                                                          |   |   |   |   |
|----|----------------------------------------------------------------------------------------------------------------------------------------------------------|---|---|---|---|
| 1  | Eligibility screen                                                                                                                                       | X |   |   |   |
| 2  | Written and verbal study information                                                                                                                     | X |   |   |   |
| 3  | Informed consent                                                                                                                                         | X |   |   |   |
| 4  | Allocation/randomization                                                                                                                                 |   | X |   |   |
| 5  | <b>Interventions</b>                                                                                                                                     |   |   |   |   |
| 6  | Intervention, SWEPPE (12 months)                                                                                                                         |   |   | X | X |
| 7  | Control (12 months)                                                                                                                                      |   |   | X | X |
| 8  | <b>Outcome assessments</b>                                                                                                                               |   |   |   |   |
| 9  | <b>Personal characteristics</b>                                                                                                                          |   |   |   |   |
| 10 | Sex, age, (SQRP sc and pc)                                                                                                                               |   |   | X |   |
| 11 | Education (SQRP sc and pc)                                                                                                                               |   |   | X |   |
| 12 | Employment, work importance and type of work (SQRP sc, supplementary questions for pc)                                                                   |   |   | X |   |
| 13 | Diagnosis, pain duration (SQRP sc and pc)                                                                                                                |   |   | X |   |
| 14 | Sick leave during one year before IPRP (supplementary questionnaire)                                                                                     |   |   | X |   |
| 15 | <b>Primary outcomes</b>                                                                                                                                  |   |   |   |   |
| 16 | Number of gross and net days with sickness cash benefit during the follow up period (SSIA)                                                               |   |   | X | X |
| 17 | <b>Secondary outcomes</b>                                                                                                                                |   |   |   |   |
| 18 | Return to work (partially or full time) every month (SSIA)                                                                                               |   |   | X | X |
| 19 | Number of sick-leave spells (per month) (SSIA)                                                                                                           |   |   | X | X |
| 20 | Proportions of a group who returns to full- or part-time work (per month) (SSIA)                                                                         |   |   | X | X |
| 21 | Number of days in work before new sick leave during study period (SSIA)                                                                                  |   |   | X | X |
| 22 | Proportion of a group back to work >28 days (full- or part time) before a new sick-leave spell occurs (SSIA)                                             |   |   | X | X |
| 23 | Number of sick-leave spells during study period (SSIA)                                                                                                   |   |   | X | X |
| 24 | Length of total sick leave during study period (SSIA)                                                                                                    |   |   | X | X |
| 25 | Pain intensity (last 7 days), NRS (SQRP sc and pc)                                                                                                       |   |   | X | X |
| 26 | Consequences of pain on daily life, MPI-S (SQRP sc and pc)                                                                                               |   |   | X | X |
| 27 | Overall emotional distress, HADS (SQRP sc and pc)                                                                                                        |   |   | X | X |
| 28 | Physical and mental health, RAND-36, (SQRP sc, supplementary questionnaire for pc)                                                                       |   |   | X | X |
| 29 | Goal fulfilment and satisfaction (supplementary questionnaire)                                                                                           |   |   | X | X |
| 30 | <b>Explanatory variables</b>                                                                                                                             |   |   |   |   |
| 31 | Self-reported fatigue (last 7 days), NRS (supplementary question)                                                                                        |   |   | X | X |
| 32 | Self-reported level of sleep disturbance, ISI (SQRP sc, supplementary questionnaire for pc)                                                              |   |   | X | X |
| 33 | Self-reported fear of movement, TSK (SQRP sc, supplementary questionnaire for pc)                                                                        |   |   | X | X |
| 34 | Self-reported physical activity, (SQRP sc, supplementary questionnaire for pc)                                                                           |   |   | X | X |
| 35 | Pain catastrophizing, PCS (SQRP sc and pc)                                                                                                               |   |   | X | X |
| 36 | Perceived work ability, WAI (SQRP sc and pc)                                                                                                             |   |   | X | X |
| 37 | Self-reported demands, control, and support at the workplace, DCSQ (supplementary questionnaire)                                                         |   |   | X | X |
| 38 | Physical work environment (supplementary questionnaire)                                                                                                  |   |   | X | X |
| 39 | Perceived life Satisfaction, LiSat (Optional questionnaire in SQRP for sc units, supplementary questionnaire for sc units not using it and for pc units) |   |   | X | X |
| 40 |                                                                                                                                                          |   |   |   |   |
| 41 |                                                                                                                                                          |   |   |   |   |
| 42 |                                                                                                                                                          |   |   |   |   |
| 43 |                                                                                                                                                          |   |   |   |   |
| 44 |                                                                                                                                                          |   |   |   |   |
| 45 |                                                                                                                                                          |   |   |   |   |
| 46 |                                                                                                                                                          |   |   |   |   |
| 47 |                                                                                                                                                          |   |   |   |   |
| 48 |                                                                                                                                                          |   |   |   |   |
| 49 |                                                                                                                                                          |   |   |   |   |
| 50 |                                                                                                                                                          |   |   |   |   |
| 51 |                                                                                                                                                          |   |   |   |   |
| 52 |                                                                                                                                                          |   |   |   |   |
| 53 |                                                                                                                                                          |   |   |   |   |
| 54 |                                                                                                                                                          |   |   |   |   |
| 55 |                                                                                                                                                          |   |   |   |   |
| 56 |                                                                                                                                                          |   |   |   |   |
| 57 |                                                                                                                                                          |   |   |   |   |
| 58 |                                                                                                                                                          |   |   |   |   |
| 59 |                                                                                                                                                          |   |   |   |   |
| 60 |                                                                                                                                                          |   |   |   |   |

|                                                                                         |  |  |   |   |
|-----------------------------------------------------------------------------------------|--|--|---|---|
| Self-reported work situation during the study period ( <i>supplementary questions</i> ) |  |  | X | X |
| Self-reported workload during the study period ( <i>supplementary questions</i> )       |  |  | X | X |

Abbreviations: -t<sup>1</sup> = pre recruitment period, t<sup>1</sup> = completed study period and follow-up 12 months after completed interdisciplinary pain rehabilitation program. SQRP= Swedish national Quality Registry for Pain rehabilitation. Sc=specialist care level. Pc=primary care level. NRS = Numeric Pain/Fatigue Rating Scale. MPI-S = Multidimensional Pain Inventory Swedish version. HADS = Hospital anxiety and Depression Scale. TSK = Fear-avoidance Tampa scale for Kinesiophobia. SSIA = Swedish Social Insurance Agency. PCS = Pain Catastrophizing Scale. WAI = Work Ability Index. DCSQ = The Swedish Demand-Control-Support Questionnaire. LiSat = Life Satisfaction Scale.

### Secondary outcomes from SSIA:

- Frequencies of individuals in a group who return to full- or part-time work
- Number of sick-leave spells (per month).
- Proportions of a group who returns to full- or part-time work (per month).
- Number of days at work before a new sick-leave spell >14 days occurs (in current diagnosis and in total for all diagnoses).
- Proportions of a group who is back to work >28 days (full- or part time) before a new sick-leave spell occurs.
- Number of new sick-leave spells during the study period.
- Duration of new sick-leave spells per person (gross and net days).[55]

### Secondary outcomes from SQRP for specialist and primary care, and supplementary questionnaires:

- Pain intensity during the last seven days estimated with the Numeric Pain Rating Scale (NRS, 0-10).[56]
- Consequences of pain on daily life measured with the Multidimensional Pain Inventory Scale Swedish version, section 1 and 2 (MPI-S, 0 - 6).[57,58]
- Overall emotional distress assessed with the Hospital Anxiety and Depression scale (HADS).[59-61]
- Health related quality of life measured with the RAND-36 health survey.[60,62-64]



- Goal fulfilment inspired by the Canadian Occupational Performance Measure (COPM).[65] The participants will at baseline be asked to report their work-related goal of full- or part-time work for the coming twelve months and rate their present goal fulfilment and satisfaction on a scale ranging from 0, equalling ‘far from reaching my goal’/‘not satisfied at all’, to 10, equalling ‘my goal is fulfilled’/‘very satisfied’. At twelve months they will be asked to rate their goal fulfilment and satisfaction again.

### *Explanatory variables*

The following explanatory variables, consistent with a biopsychosocial perspective, will be collected from SQRP for specialist and primary care, and supplementary questionnaires:

- Self-reported fatigue during the last seven days estimated with the Numeric Fatigue Rating Scale (0-10).[66-68]
- Patient-reported insomnia measured with the Insomnia Severity Index (ISI).[69,70]
- Fear of movement assessed with Fear-avoidance Tampa scale for Kinesiophobia (17 items).[71]
- Physical activity estimated with the National Board of Health and Welfare’s three questions on physical activity (0 - >300 minutes/week), exercise (0 - >120 minutes/week), and sedentary behavior (0 - 15 hours).[72]
- Pain related catastrophizing assessed with the Pain Catastrophizing Scale (PCS).[73]
- Perceived work ability measured with the Work Ability Index (WAI) (0-10).[74]
- Job characteristics influencing psychological well-being estimated with the The Swedish Demand-Control-Support Questionnaire (DCSQ).[75]
- Self-reported physical work environment using a questionnaire inspired by the Swedish Work Environment Authority ergonomics checklist.[76,77]

- Perceived life satisfaction (1 - 6) measured with the Life Satisfaction Scale (LiSat).[78,79]
- Self-reported perceived work situation regarding barriers for RTW, strategies to handle barriers and need of support from the employer.
- Self-reported total workload where the participants register number of hours per day for paid work and unpaid household work.[80-82]

### ***Data collected from SWEPPE***

Mobile app usage, for example number of participants using the app, performing daily self-rating, sharing information with the employer, or asking questions to the coach will be retrieved from SWEPPE.

### **Data collection methods**

Data collection for the present trial will start during 2022. Baseline data will be collected when the IPRP is completed and study ending will be at 12 months follow-up after IPRP.

Data will be collected from SSIA, the SQRP, supplementary questionnaires to the SQRP, and data registered in SWEPPE (table 1). Data collection for the SQRP is routinely performed when the IPRP is completed and at 12 months follow-up at both primary and specialized care units in Sweden providing IPRP. The supplementary questionnaires will be added to these routine data collections for the SQRP.

### **Data management**

Data will be retrieved from SSIA and from the SQRP and connected to individual-level data retrieved from SWEPPE. The procedure is initiated by sending a file with the participants social security numbers and a consecutive number key to the SSIA who will fill in the ordered

1  
2  
3 data for each participant. The SSIA will then send the file to SQRP for addition of registry  
4 data. The principal investigator will receive the file with consecutive numbered data from  
5 SQRP. All data collected in the study will be stored on a safe server at Linköping University.  
6  
7  
8  
9  
10 A data management plan (DMP) will be developed by the principal investigator and co-  
11 workers and will include a description of research data, information about documentation and  
12 quality control of research data, storage and back-up copying of research data, legal and  
13  
14  
15  
16  
17 ethical aspects, accessibility and long-term preservation of research data, and responsibility  
18 and resources related to the research data.  
19  
20  
21  
22  
23

### 24 **Statistical analysis**

25  
26 A statistical analysis plan will be developed with details of statistical analyses, handling of  
27 missing data and any additional analyses, for example subgroup and adjusted analyses.  
28  
29 Descriptive statistical analyses will be performed for reporting of participant characteristics.  
30  
31 The clinical effectiveness of SWEPE will be analysed using uni- and multivariate statistical  
32 analyses as a preliminary plan. Data from primary and secondary outcomes will be analysed  
33 according to intention-to-treat. All p-values will be presented and a p-value of  $<0.05$  will be  
34 considered significant.  
35  
36  
37  
38  
39  
40  
41  
42  
43  
44

### 45 **Data monitoring**

46  
47 All data in the trial will be monitored regularly. Since no sponsors or competing interests  
48 exists, monitoring of data will be performed independently. To ensure proper handling and  
49 storing of data (structure, organization, file naming), the data management plan (DMP) will  
50 be reviewed regularly by the principal investigator and co-workers.  
51  
52  
53  
54  
55  
56  
57  
58

### 59 **Harms**

1  
2  
3 SWEPEPE can be assumed not to create adverse events and is considered a safe intervention.  
4  
5 Nevertheless, all participants will be encouraged to report any adverse events or unintended  
6  
7 effects of trial intervention or trial conduct such as unexpected side effects or deterioration of  
8  
9 symptoms.[83]  
10  
11  
12  
13  
14

### 15 **Auditing**

16  
17 To facilitate adherence to the study protocol[84], the project coordinator (CT) will have  
18  
19 regular contact (every second week) with the unit coordinators during the study period.  
20  
21 Processes to be reviewed are participant screening and eligibility. Documentation of the  
22  
23 recruitment and randomization/allocation process, for example eligible patients asked to  
24  
25 participate, the number of patients included, excluded or declining participation, performed by  
26  
27 CT will be reviewed by the researchers (GL, MB).  
28  
29  
30  
31  
32

### 33 **ETHICS AND DISSEMINATION**

34  
35 The study is approved by the Swedish Ethics Review Board (Dnr 2020-01593, Dnr 2021-  
36  
37 01854) and the trial is registered in ClinicalTrials.gov (NCT05058547). Any important  
38  
39 modifications of the study protocol will be communicated to the Swedish Ethics Review  
40  
41 Board and to the participants. Informed consent will be collected from all participants by one  
42  
43 of the researchers (CT). The consent form is design based on the Ethics committee  
44  
45 recommendation and includes written information about the study.  
46  
47  
48

49  
50 Confidentiality will be protected by coding of individual participants' collected data. Data will  
51  
52 be stored at a password protected project server at Linköping University and will not be  
53  
54 accessed by unauthorized persons. The study results will be submitted to peer-review journals  
55  
56 for publication and will be presented in national and international research networks, clinical  
57  
58 settings, and patient associations. The study protocol will be available via Clinicaltrial.gov.  
59  
60

1  
2  
3 There is no present plan regarding public access of participant-level data set or statistical  
4  
5 code.  
6  
7  
8  
9

## 10 **AUTHOR CONTRIBUTION**

11  
12 MB and GL formed the original research concept. CT, MB and GL contributed to the study  
13 design and CT will coordinate the project in cooperation with MB and GL. CT, ML and LV  
14 will be responsible for the unit coordinators at each participating unit and the inclusion of  
15 participants. All authors will collect and manage data during the trial. CT, MB and GL have  
16 written and revised this protocol with critical input from ML and LV. All authors have  
17 contributed important intellectual content to the manuscript.  
18  
19  
20  
21  
22  
23  
24  
25  
26  
27  
28

## 29 **FUNDING**

30  
31 This study was supported by the Swedish Research Council for Health, Working Life and  
32 Welfare (Dnr 2019-01264).  
33  
34  
35  
36  
37  
38

## 39 **COMPETING INTERESTS STATEMENT**

40  
41 The authors have no competing interests to declare.  
42  
43  
44  
45  
46  
47  
48  
49  
50  
51  
52  
53  
54  
55  
56  
57  
58  
59  
60

## REFERENCES

1. Harker J, Reid KJ, Bekkering GE, et al. Epidemiology of chronic pain in denmark and sweden. *Pain Res Treat* 2012;2012:371248.
2. Reid KJ, Harker J, Bala MM, et al. Epidemiology of chronic non-cancer pain in Europe: narrative review of prevalence, pain treatments and pain impact. *Curr Med Res Opin* 2011;27(2):449-62.
3. Dahlhamer J, Lucas J, Zelaya C, et al. Prevalence of Chronic Pain and High-Impact Chronic Pain Among Adults - United States, 2016. *MMWR Morb Mortal Wkly Rep* 2018;67(36):1001-6.
4. Perez C, Margarit C, Sanchez-Magro I, et al. Chronic pain features relate to quality of life more than physiopathology: A cross-sectional evaluation in pain clinics. *Pain Pract* 2017;17(7):866-78.
5. Gerdle B, Bjork J, Henriksson C, et al. Prevalence of current and chronic pain and their influences upon work and healthcare-seeking: a population study. *J Rheumatol* 2004;31(7):1399-406.
6. Caceres-Matos R, Gil-Garcia E, Barrientos-Trigo S, et al. Consequences of chronic non-cancer pain in adulthood. Scoping review. *Rev Saude Publica* 2020;54:39.
7. Asmundson GJ, Katz J. Understanding the co-occurrence of anxiety disorders and chronic pain: state-of-the-art. *Depress Anxiety* 2009;26(10):888-901.
8. Shupler MS, Kramer JK, Cragg JJ, et al. Pan-Canadian Estimates of Chronic Pain Prevalence From 2000 to 2014: A Repeated Cross-Sectional Survey Analysis. *J Pain* 2019;20(5):557-65.
9. Kamper SJ, Apeldoorn AT, Chiarotto A, et al. Multidisciplinary biopsychosocial rehabilitation for chronic low back pain: Cochrane systematic review and meta-analysis. *BMJ* 2015;350:h444.
10. Waterschoot FPC, Dijkstra PU, Geertzen JHB, et al. Dose or content? Effectiveness of pain rehabilitation programs for patients with chronic low back pain: A systematic review. Author reply. *Pain* 2014;155(9):1902-3.
11. Scascighini L, Toma V, Dober-Spielmann S, et al. Multidisciplinary treatment for chronic pain: a systematic review of interventions and outcomes. *Rheumatology (Oxford)* 2008;47(5):670-8.
12. Svanholm F, Liedberg GM, Lofgren M, et al. Factors of importance for return to work, experienced by patients with chronic pain that have completed a multimodal rehabilitation program - a focus group study. *Disabil Rehabil* 2020:1-9.
13. Toye F, Seers K, Allcock N, et al. A synthesis of qualitative research exploring the barriers to staying in work with chronic musculoskeletal pain. *Disabil Rehabil* 2016;38(6):566-72.
14. Liedberg G, Björk M, Dragioti E, et al. Qualitative evidence from studies of interventions aimed at return to work and staying at work for persons with chronic musculoskeletal pain. *J Clin Med* 10, 1247 2021;10(1247).
15. Wilkie R, Bjork M, Costa-Black KM, et al. Managing work participation for people with rheumatic and musculoskeletal diseases. *Best Pract Res Clin Rheumatol* 2020;34(2):101517.
16. Glavare M, Lofgren M, Schult ML. Between unemployment and employment: experience of unemployed long-term pain sufferers. *Work* 2012;43(4):475-85.

17. Saunders SL, Nedelec B. What work means to people with work disability: a scoping review. *J Occup Rehabil* 2014;24(1):100-10.
18. Grant M, O-Beirne-Elliman J, Froud R, et al. The work of return to work. Challenges of returning to work when you have chronic pain: a meta-ethnography. *BMJ Open* [Internet]. 2019; 9.
19. Magalhães L, Chan C, Chapman A, et al. Successful return to work of individuals with chronic pain according to health care providers: a meta-synthesis. *Cadernos Brasileiros de Terapia Ocupacional/Brazilian Journal of Occupational Therapy* 2017;25(4):825-37.
20. Cohen D, Allen J, Rhydderch M, et al. The return to work discussion: a qualitative study of the line manager conversation about return to work and the development of an educational programme. *J Rehabil Med* 2012;44(8):677-83.
21. Scott W, Chilcot J, Guildford B, et al. Feasibility randomized-controlled trial of online Acceptance and Commitment Therapy for patients with complex chronic pain in the United Kingdom. *Eur J Pain* 2018;22(8):1473-84.
22. Coutu M, Legare F, Durand MJ, et al. Acceptability and feasibility of a shared decision-making model in work rehabilitation: A mixed-methods study of stakeholders' perspectives. *J Occup Rehabil* 2019;29(1):128-39.
23. Turesson C, Liedberg G, Bjork M. Development of an evidence-based digital support for sustainable return to work for persons with chronic pain and their employers: a user-centered agile design approach. *JMIR Human Factors*;07/12/2021:33571 (forthcoming/in press). <http://dx.doi.org/10.2196/33571>
24. Brhel M, Meth H, Maedche A, et al. Exploring principles of user-centered agile software development: A literature review. *Inform Software Tech* 2015;61:163-81.
25. Braillard O, Cedraschi C, Jesaimani A, et al. Chronic noncancer pain and patient education: a place for e-learning? *Rev Med Suisse* 2015;11(480):1400, 2-5.
26. Solem IKL, Varsi C, Eide H, et al. A user-centered approach to an evidence-based electronic health pain management intervention for people with chronic pain: design and development of EPIO. *JMIR* 2020;22(1).
27. Kristjansdottir OB, Fors EA, Eide E, et al. A smartphone-based intervention with diaries and therapist feedback to reduce catastrophizing and increase functioning in women with chronic widespread pain. part 2: 11-month follow-up results of a randomized trial. *JMIR* 2013;15(3):e72.
28. Thurnheer SE, Gravestock I, Pichierri G, et al. Benefits of mobile apps in pain management: systematic review. *JMIR Mhealth Uhealth* 2018;6(10):e11231.
29. Garg S, Garg D, Turin TC, et al. Web-based interventions for chronic back pain: a systematic review. *JMIR* 2016;18(7):e139.
30. Slattery BW, Haugh S, O'Connor L, et al. An evaluation of the effectiveness of the modalities used to deliver electronic health interventions for chronic pain: systematic review with network meta-analysis. *JMIR* 2019;21(7).
31. Solem IKL, Varsi C, Eide H, et al. Patients' needs and requirements for eHealth pain management interventions: qualitative study. *JMIR* 2019;21(4).
32. Timmers T, Janssen L, Kool RB, et al. Educating patients by providing timely information using smartphone and tablet apps: systematic review. *JMIR* 2020;22(4):e17342.
33. Granja C, Janssen W, Johansen MA. Factors determining the success and failure of eHealth interventions: systematic review of the literature. *JMIR* 2018;20(5):e10235.



- 1
- 2
- 3
- 4 34. Devan H, Hale L, Hempel D, et al. What works and does not work in a self-
- 5 management intervention for people with chronic pain? Qualitative systematic review and
- 6 meta-synthesis. *Phys Ther* 2018;98(5):381-97.
- 7 35. Devan H, Farmery D, Peebles L, et al. Evaluation of self-management support
- 8 functions in apps for people with persistent pain: systematic review. *JMIR Mhealth Uhealth*
- 9 2019;7(2):e13080.
- 10 36. Ruckenstein M. Visualized and interacted life: personal analytics and
- 11 engagement with data doubles. *Societies* 2014;4:68-84.
- 12 37. Mamykina L, Smaldone AM, Bakken SR. Adopting the sensemaking perspective
- 13 for chronic disease self-management. *J Biomed Inform* 2015;56:406-17.
- 14 38. Morton K, Dennison L, May C, et al. Using digital interventions for self-
- 15 management of chronic physical health conditions: A meta-ethnography review of published
- 16 studies. *Patient Educ Couns* 2017;100(4):616-35.
- 17 39. Machado GC, Pinheiro MB, Lee H, et al. Smartphone apps for the self-
- 18 management of low back pain: A systematic review. *Best Pract Res Clin Rheumatol*
- 19 2016;30(6):1098-109.
- 20 40. Coe-O'Brien R, Joseph L, Kuisma R, et al. Outcome measures used in the
- 21 smartphone applications for the management of low back pain: a systematic scoping review.
- 22 *Health Inf Sci Syst* 2020;8(1):5.
- 23 41. Chan AW, Tetzlaff JM, Altman DG, et al. SPIRIT 2013 statement: defining
- 24 standard protocol items for clinical trials. *Ann Intern Med* 2013;158(3):200-7.
- 25 42. Schulz KF, Altman DG, Moher D, et al. CONSORT 2010 statement: updated
- 26 guidelines for reporting parallel group randomised trials. *Int J Surg* 2011;9(8):672-7.
- 27 43. Campbell MK, Piaggio G, Elbourne DR, et al. Consort 2010 statement: extension
- 28 to cluster randomised trials. *BMJ* 2012;345:e5661.
- 29 44. WHO. WHO Trial Registration Data Set (Version 1.3.1): World Health
- 30 Organization; 2021 [Available from: [https://www.who.int/clinical-trials-registry-](https://www.who.int/clinical-trials-registry-platform/network/who-data-set)
- 31 [platform/network/who-data-set](https://www.who.int/clinical-trials-registry-platform/network/who-data-set)].
- 32 45. Sennehed CP, Stigmar K, Grahn B, et al. Evaluation of a multimodal pain
- 33 rehabilitation programme in primary care based on clinical register data: a feasibility study.
- 34 *Prim Health Care Res Dev* 2020;21:e2.
- 35 46. Rivano Fischer M, Persson EB, Stalnacke BM, et al. Return to work after
- 36 interdisciplinary pain rehabilitation: One- and two-year follow-up based on the Swedish
- 37 Quality Registry for Pain rehabilitation. *J Rehabil Med* 2019;51(4):281-9.
- 38 47. LoMartire R, Dahlstrom O, Bjork M, et al. Predictors of Sickness Absence in a
- 39 Clinical Population With Chronic Pain. *J Pain* 2021;22(10):1180-94.
- 40 48. Altman DG, Bland JM. How to randomise. *BMJ* 1999;319(7211):703-4.
- 41 49. Kim J, Shin W. How to do random allocation (randomization). *Clin Orthop Surg*
- 42 2014;6(1):103-9.
- 43 50. Sedgwick P. Treatment allocation in trials: block randomisation. *BMJ*
- 44 2014;348:g2409.
- 45 51. IASP. IASP Terminology [Available from: [https://www.iasp-](https://www.iasp-pain.org/terminology?navItemNumber=576#Pain)
- 46 [pain.org/terminology?navItemNumber=576#Pain](https://www.iasp-pain.org/terminology?navItemNumber=576#Pain) [200818].
- 47 52. Ballantyne JC, Sullivan MD. Intensity of Chronic Pain--The Wrong Metric? *N*
- 48 *Engl J Med* 2015;373(22):2098-9.
- 49
- 50
- 51
- 52
- 53
- 54
- 55
- 56
- 57
- 58
- 59
- 60



- 1
- 2
- 3
- 4 53. Turk DC, Dworkin RH, Revicki D, et al. Identifying important outcome domains
- 5 for chronic pain clinical trials: an IMMPACT survey of people with pain. *Pain*
- 6 2008;137(2):276-85.
- 7 54. Patel KV, Amtmann D, Jensen MP, et al. Clinical outcome assessment in clinical
- 8 trials of chronic pain treatments. *Pain Rep* 2021;6(1):e784.
- 9 55. Försäkringskassan. Förslag på utfallsmått för att mäta återgång i arbete efter
- 10 sjukskrivning. Försäkringskassan Analys och prognos; 2016.
- 11 56. Williamson A, Hoggart B. Pain: a review of three commonly used pain rating
- 12 scales. *J Clin Nurs* 2005;14(7):798-804.
- 13 57. Bergstrom G, Jensen IB, Bodin L, et al. Reliability and factor structure of the
- 14 Multidimensional Pain Inventory Swedish Language Version (MPI-S). *Pain* 1998;75(1):101-10.
- 15 58. Kerns RD, Turk DC, Rudy TE. The West Haven-Yale Multidimensional Pain
- 16 Inventory (WHYMPI). *Pain* 1985;23(4):345-56.
- 17 59. Bjelland I, Dahl AA, Haug TT, et al. The validity of the Hospital Anxiety and
- 18 Depression Scale. An updated literature review. *J Psychosom Res* 2002;52(2):69-77.
- 19 60. LoMartire R, Äng BO, Gerdle B, et al. Psychometric properties of Short Form-36
- 20 Health Survey, EuroQol 5-dimensions, and Hospital Anxiety and Depression Scale in patients
- 21 with chronic pain. *Pain* 2020;161(1):83-95.
- 22 61. Snaith RP. The Hospital Anxiety And Depression Scale. *Health Qual Life*
- 23 *Outcomes* 2003;1:29.
- 24 62. Vetter TR. A Primer on Health-Related Quality of Life in Chronic Pain Medicine.
- 25 *Anesthesia & Analgesia* 2007;104(3).
- 26 63. Orwelius L, Nilsson M, Nilsson E, et al. The Swedish RAND-36 Health Survey -
- 27 reliability and responsiveness assessed in patient populations using Svensson's method for
- 28 paired ordinal data. *J Patient Rep Outcomes* 2017;2(1):4.
- 29 64. Vetter TR. A primer on health-related quality of life in chronic pain medicine.
- 30 *Anesth Analg* 2007;104(3):703-18.
- 31 65. Wressle E, Lindstrand J, Neher M, et al. The Canadian occupational
- 32 performance measure as an outcome measure and team tool in a day treatment
- 33 programme. *Disabil Rehabil* 2003;25(10):497-506.
- 34 66. Aaronson L, Teel C, Cassmeyer V, et al. Defining and measuring fatigue. *J Nurs*
- 35 *Scholarsh* 1999;31(1):45-50.
- 36 67. Chuang LL, Lin KC, Hsu AL, et al. Reliability and validity of a vertical numerical
- 37 rating scale supplemented with a faces rating scale in measuring fatigue after stroke. *Health*
- 38 *Qual Life Outcomes* 2015;13:91.
- 39 68. Dailey DL, Frey Law LA, Vance CG, et al. Perceived function and physical
- 40 performance are associated with pain and fatigue in women with fibromyalgia. *Arthritis Res*
- 41 *Ther* 2016;18:68.
- 42 69. Akerstedt T, Anund A, Axelsson J, et al. Subjective sleepiness is a sensitive
- 43 indicator of insufficient sleep and impaired waking function. *J Sleep Res* 2014;23(3):240-52.
- 44 70. Morin CM. Measuring outcomes in randomized clinical trials of insomnia
- 45 treatments. *Sleep Med Rev* 2003;7(3):263-79.
- 46 71. Boersma K, Linton S, Overmeer T, et al. Lowering fear-avoidance and enhancing
- 47 function through exposure in vivo. A multiple baseline study across six patients with back
- 48 pain. *Pain* 2004;108(1-2):8-16.
- 49 72. Agerberg M. Ställ rätt fråga om fysisk aktivitet. *Läkartidningen*
- 50 2014;48(111):C9AY.
- 51
- 52
- 53
- 54
- 55
- 56
- 57
- 58
- 59
- 60

- 1  
2  
3 73. Sullivan M, Bishop L, Scott R, et al. The Pain Catastrophizing Scale:  
4 Development and validation. *Psychological Assessment* 1995;7(4):524-32.  
5  
6 74. Lundin A, Leijon O, Vaez M, et al. Predictive validity of the Work Ability Index  
7 and its individual items in the general population. *Scand J Public Health* 2017;45(4):350-6.  
8  
9 75. Sanne B, Torp S, Mykletun A, et al. The Swedish Demand-Control-Support  
10 Questionnaire (DCSQ): factor structure, item analyses, and internal consistency in a large  
11 population. *Scand J Public Health* 2005;33(3):166-74.  
12  
13 76. Arbetsmiljöverket. Belastningsergonomi. Arbetsmiljöverkets föreskrifter och  
14 allmänna råd om belastningsergonomi. AFS 2012:2.  
15  
16 77. Arbetsmiljöverket. Checklista för bedömning - utifrån föreskrifterna om  
17 belastningsergonomi, AFS 2012:2. Stockholm: Arbetsmiljöverket; 2013.  
18  
19 78. Stålnacke B-M. Life satisfaction in patients with chronic pain—relation to pain  
20 intensity, disability, and psychological factors. *Neuropsychiatric Disease and Treatment*  
21 2011;7:683.  
22  
23 79. Fugl-Meyer A, Bränholm I, Fugl-Meyer K. Happiness and domain-specific life  
24 satisfaction in adult northern Swedes. *Clin Rehabil* 1991;5(1):25-33.  
25  
26 80. Krantz G, Berntsson L, Lundberg U. Total workload, work stress and perceived  
27 symptoms in Swedish male and female white-collar employees. *Eur J Public Health*  
28 2005;15(2):209-14.  
29  
30 81. Kahn R. The forms of women's work. In: Frankenhaeuser M, Lundberg U,  
31 Chesney M, editors. *Women, work and health. Stress and opportunities*. New York Plenum  
32 Press; 1991. p. 65-83.  
33  
34 82. Mårdberg B, Lundberg U, Frankenhaeuser M. The total workload of parents  
35 employed in white-collar jobs: construction of a questionnaire and a scoring system. *Scand J*  
36 *of Psychology* 1991;32:233-9.  
37  
38 83. Palermo TM, Slack K, Loren D, et al. Measuring and reporting adverse events in  
39 clinical trials of psychological treatments for chronic pain. *Pain* 2020;161(4):713-7.  
40  
41 84. Chan AW, Tetzlaff JM, Gotzsche PC, et al. SPIRIT 2013 explanation and  
42 elaboration: guidance for protocols of clinical trials. *BMJ* 2013;346:e7586.  
43  
44  
45  
46  
47  
48  
49  
50  
51  
52  
53  
54  
55  
56  
57  
58  
59  
60

1  
2  
3  
4  
5  
6 **Figure legends**  
7

8 Figure 1. Time schedule of enrolment, interventions, and assessments.  
9  
10  
11  
12  
13  
14  
15  
16  
17  
18  
19  
20  
21  
22  
23  
24  
25  
26  
27  
28  
29  
30  
31  
32  
33  
34  
35  
36  
37  
38  
39  
40  
41  
42  
43  
44  
45  
46  
47  
48  
49  
50  
51  
52  
53  
54  
55  
56  
57  
58  
59  
60

For peer review only

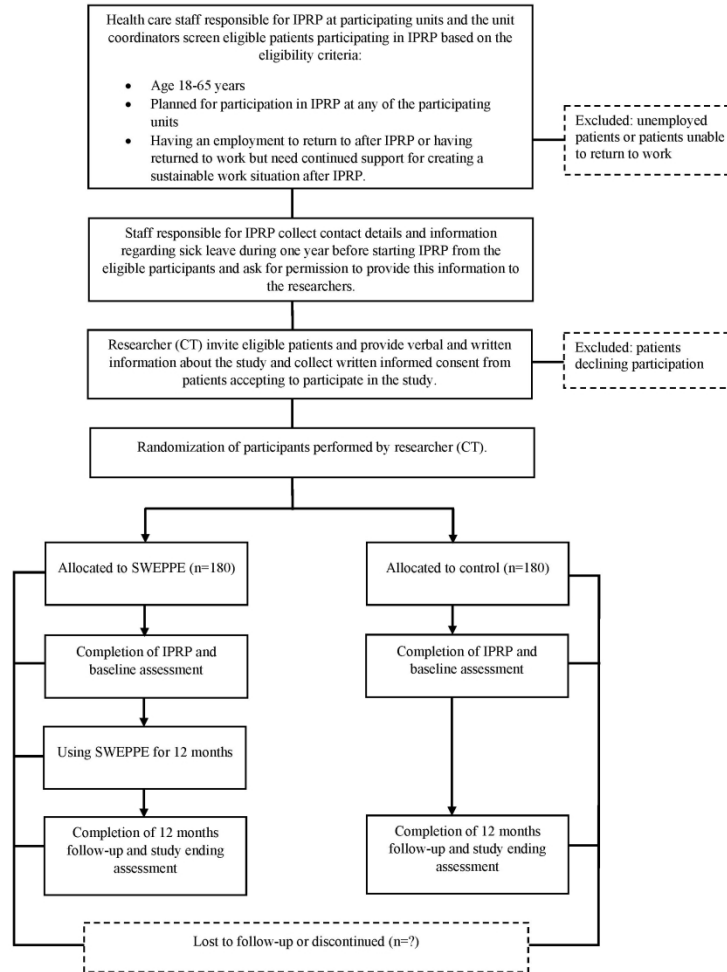

Figure 1. Time schedule of enrolment, interventions, and assessments.

210x297mm (300 x 300 DPI)

## S1. Overview of the study based on the SPIRIT 2013 checklist.

| Section                    | SPIRIT item number | Item description                                                         | Study description                                                                                                                                                                                                                                                                                                                                                                                                                                                                                                                                                                                                                                                                                            | Page number where item can be found. |
|----------------------------|--------------------|--------------------------------------------------------------------------|--------------------------------------------------------------------------------------------------------------------------------------------------------------------------------------------------------------------------------------------------------------------------------------------------------------------------------------------------------------------------------------------------------------------------------------------------------------------------------------------------------------------------------------------------------------------------------------------------------------------------------------------------------------------------------------------------------------|--------------------------------------|
| Title                      | 1                  | Title                                                                    | An evidence-based digital support during one year after an Interdisciplinary Pain Rehabilitation Program for persons with chronic musculoskeletal pain to facilitate a sustainable return to work: study protocol for a registry-based multicentre randomized controlled trial.                                                                                                                                                                                                                                                                                                                                                                                                                              | Page 1, manuscript                   |
| Trial registration         | 2a                 | Trial identifier and registry name                                       | ClinicalTrials.gov registration number NCT05058547                                                                                                                                                                                                                                                                                                                                                                                                                                                                                                                                                                                                                                                           | Page 4, manuscript                   |
|                            | 2b                 | All items from the World Health Organization trial registration data set | Supplementary table 2 below.                                                                                                                                                                                                                                                                                                                                                                                                                                                                                                                                                                                                                                                                                 | Page 16, supplementary file          |
| Protocol version           | 3                  | Date and version identifier                                              | Version 1. 27 September 2021. NCT05058547                                                                                                                                                                                                                                                                                                                                                                                                                                                                                                                                                                                                                                                                    | Page 4, manuscript                   |
| Funding                    | 4                  | Sources and types                                                        | The Swedish Research Council for Health, Working Life and Welfare: Dnr 2019-01264. Financial.                                                                                                                                                                                                                                                                                                                                                                                                                                                                                                                                                                                                                | Page 19, manuscript                  |
| Roles and responsibilities | 5a                 | Names, affiliations, and roles of protocol contributors                  | Christina Turesson <sup>1</sup> , Gunilla Liedberg <sup>1</sup> , Linda Vixner <sup>2</sup> , Monica Löfgren <sup>3</sup> , Mathilda Björk <sup>4</sup> MB and GL formed the original research concept. CT, MB and GL contributed to the study design and CT will coordinate the project in cooperation with MB and GL. CT, ML and LV will be responsible for the unit coordinators at each participating unit and the inclusion of participants. All authors will collect and manage data during the trial. CT, MB and GL have written and revised this protocol with critical input from ML and LV. All authors have contributed important intellectual content to the manuscript.<br><b>Affiliations:</b> | Page 1 and 19, manuscript            |

|  |    |                                                                                                                                                                                                                                                                                          |                                                                                                                                                                                                                                                                                                                                                                                                                                                                                                                                     |                    |
|--|----|------------------------------------------------------------------------------------------------------------------------------------------------------------------------------------------------------------------------------------------------------------------------------------------|-------------------------------------------------------------------------------------------------------------------------------------------------------------------------------------------------------------------------------------------------------------------------------------------------------------------------------------------------------------------------------------------------------------------------------------------------------------------------------------------------------------------------------------|--------------------|
|  |    |                                                                                                                                                                                                                                                                                          | <p>1. Division of Prevention, Rehabilitation and Community Medicine, Department of Health, Medicine and Caring Sciences, Linköping University, Linköping, Sweden</p> <p>2. School of Health and Welfare, Dalarna University, Falun, Sweden</p> <p>3. Karolinska Institutet, Department of Clinical Sciences and Department of Rehabilitation Medicine Danderyd Hospital, 182 88 Stockholm</p> <p>4. Pain and Rehabilitation Centre, Department of Health, Medicine and Caring Sciences, Linköping University, Linköping, Sweden</p> |                    |
|  | 5b | Name and contact information for the trial sponsor                                                                                                                                                                                                                                       | <p>Linköping University<br/>581 83 Linköping<br/>Sweden<br/>+46 28 10 00</p>                                                                                                                                                                                                                                                                                                                                                                                                                                                        | Page 1, manuscript |
|  | 5c | Role of study sponsor and funders, if any, in study design; collection, management, analysis, and interpretation of data; writing of the report; and the decision to submit the report for publication, including whether they will have ultimate authority over any of these activities | N/A                                                                                                                                                                                                                                                                                                                                                                                                                                                                                                                                 |                    |
|  | 5d | Composition, roles, and responsibilities of the coordinating center, steering                                                                                                                                                                                                            | N/A                                                                                                                                                                                                                                                                                                                                                                                                                                                                                                                                 |                    |

1  
2  
3  
4  
5  
6  
7  
8  
9  
10  
11  
12  
13  
14  
15  
16  
17  
18  
19  
20  
21  
22  
23  
24  
25  
26  
27  
28  
29  
30  
31  
32  
33  
34  
35  
36  
37  
38  
39  
40  
41  
42  
43  
44  
45  
46

|                                                 |    |                                                                                                                                                                                                    |                                                                                                                                                                                                                                                                                                                                                                                                                                                                                                                                                                                                                                                                                                                                                                                                                                                                                                                                                                                                                                                                                                                                                                                                                                                                                                                                                                                                                                                                                                                                                                                                                                                                                                                                               |                      |
|-------------------------------------------------|----|----------------------------------------------------------------------------------------------------------------------------------------------------------------------------------------------------|-----------------------------------------------------------------------------------------------------------------------------------------------------------------------------------------------------------------------------------------------------------------------------------------------------------------------------------------------------------------------------------------------------------------------------------------------------------------------------------------------------------------------------------------------------------------------------------------------------------------------------------------------------------------------------------------------------------------------------------------------------------------------------------------------------------------------------------------------------------------------------------------------------------------------------------------------------------------------------------------------------------------------------------------------------------------------------------------------------------------------------------------------------------------------------------------------------------------------------------------------------------------------------------------------------------------------------------------------------------------------------------------------------------------------------------------------------------------------------------------------------------------------------------------------------------------------------------------------------------------------------------------------------------------------------------------------------------------------------------------------|----------------------|
|                                                 |    | committee, end point adjudication committee, data management team, and other individuals or groups overseeing the trial, if applicable (see item 21a for DMC)                                      |                                                                                                                                                                                                                                                                                                                                                                                                                                                                                                                                                                                                                                                                                                                                                                                                                                                                                                                                                                                                                                                                                                                                                                                                                                                                                                                                                                                                                                                                                                                                                                                                                                                                                                                                               |                      |
| <b>Introduction</b><br>Background and rationale | 6a | Description of research question and justification for undertaking the trial, including summary of relevant studies (published and unpublished) examining benefits and harms for each intervention | Chronic musculoskeletal pain (CMSP) severely affects the individual's quality of life, functioning and ability to work, and comes with significant societal costs for sick leave and loss of productivity. After completing an Interdisciplinary Pain Rehabilitation Program (IPRP), patients with CMSP experience a gap in the return to work (RTW) process when the responsibility for RTW is taken over by the employer. The employers have a crucial role in a successful RTW process but may lack knowledge regarding the condition and how to support the employee with CMSP in the best way during RTW. Barriers for RTW for persons with CMSP are for example lack of support at the workplace, not finding the right fit between the employee's physical abilities and work tasks, or problems with relationships with supervisors or coworkers. Key factors for a successful RTW are communication and collaboration between the employer and the employee. To facilitate the important interaction between employer and employee a shared smartphone application may be a tool for increasing a successful outcome in the RTW process. Smart phone applications as digital support has shown promising results for persons with chronic pain and can be helpful especially in an out-clinic setting. They are easily accessed, can enable management of the condition, and reduce pain interference. Focusing on self-management and empowerment are important parts of successful digital support. Self-monitoring can contribute to learning about consequences of actions and behaviours in daily life. Understanding and using own self-monitoring data for making changes in daily activities can give a sense of control and | Page 5-6, manuscript |

|                              |    |                                                                                                                                                                                      |                                                                                                                                                                                                                                                                                                                                                                                                                                                                                                                                                                                |                    |
|------------------------------|----|--------------------------------------------------------------------------------------------------------------------------------------------------------------------------------------|--------------------------------------------------------------------------------------------------------------------------------------------------------------------------------------------------------------------------------------------------------------------------------------------------------------------------------------------------------------------------------------------------------------------------------------------------------------------------------------------------------------------------------------------------------------------------------|--------------------|
|                              |    |                                                                                                                                                                                      | motivation for continued use of self-management strategies. Although positive effects of digital support have been shown there are limitations related to low overall quality of smartphone apps for CMSP and lack of rigorous assessment of their effectiveness.                                                                                                                                                                                                                                                                                                              |                    |
| Objectives                   | 7  | Specific objectives or hypotheses                                                                                                                                                    | The aim is to evaluate the clinical effectiveness of a digital support (SWEPE) for promoting a sustainable RTW for persons with CMSP and to facilitate the employers' supportive role and responsibilities in the process. The hypothesis is that using SWEPE will decrease the need for sick leave.                                                                                                                                                                                                                                                                           | Page 7, manuscript |
| Trial design                 | 8  | Description of trial design, including type of trial                                                                                                                                 | Registry-based randomized controlled trial with parallel groups.                                                                                                                                                                                                                                                                                                                                                                                                                                                                                                               | Page 7, manuscript |
| <b>Methods</b> Study setting | 9  | Description of study settings (e.g., community clinic, academic hospital) and list of countries where data will be collected. Reference to where list of study sites can be obtained | Specialist and primary care level health care in Sweden reporting to the Swedish National Quality Registry for Pain Rehabilitation (SQR). Study sites are listed in the protocol (ClinicalTrials.gov registration number NCT05058547)                                                                                                                                                                                                                                                                                                                                          | Page 7, manuscript |
| Eligibility criteria         | 10 | Inclusion and exclusion criteria for participants.                                                                                                                                   | <p>Inclusion Criteria:</p> <p>Patients entering the trial must have completed an Interdisciplinary Pain Rehabilitation Program (IPRP). The principal inclusion criteria for IPRP in Sweden are:</p> <ul style="list-style-type: none"> <li>• persistent or intermittent pain lasting <math>\geq 3</math> months</li> <li>• pain affecting daily activities to a large extent,</li> <li>• completed systematic assessment and non-pharmacological optimization is completed,</li> <li>• screening for psychosocial risk factors and differential diagnosis completed</li> </ul> | Page 8, manuscript |



1  
2  
3  
4  
5  
6  
7  
8  
9  
10  
11  
12  
13  
14  
15  
16  
17  
18  
19  
20  
21  
22  
23  
24  
25  
26  
27  
28  
29  
30  
31  
32  
33  
34  
35  
36  
37  
38  
39  
40  
41  
42  
43  
44  
45  
46

|               |     |                                                                                                                                                                                                  |                                                                                                                                                                                                                                                                                                                                                                                                                                                                                                                                 |                        |
|---------------|-----|--------------------------------------------------------------------------------------------------------------------------------------------------------------------------------------------------|---------------------------------------------------------------------------------------------------------------------------------------------------------------------------------------------------------------------------------------------------------------------------------------------------------------------------------------------------------------------------------------------------------------------------------------------------------------------------------------------------------------------------------|------------------------|
|               |     |                                                                                                                                                                                                  | <p>In addition, the following criteria will be applied:</p> <ul style="list-style-type: none"> <li>• Age 18-65 years</li> <li>• Completed participation in IPRP at any of the participating units.</li> <li>• Having an employment to return to after IPRP or having returned to work but need continued support for creating a sustainable work situation after IPRP.</li> </ul> <p>Exclusion criteria:</p> <ul style="list-style-type: none"> <li>• Completed IPRP but are unemployed or unable to return to work.</li> </ul> |                        |
| Interventions | 11a | Interventions for each group with sufficient detail to allow replication, including how and when they will be administered                                                                       | <p>SWEPPE, a smartphone application where the individual can create an action plan, perform daily registrations of health aspects, self-monitoring of health aspects and goals, have access to a library with evidence-based facts and a coach, and possibility to share information with the employer. The participants will use SWEPPE for 12 months.</p> <p>Participants randomized to the control group will not receive any active intervention for RTW after IPRP.</p>                                                    | Page 10-11, manuscript |
|               | 11b | Criteria for discontinuing or modifying allocated interventions for a given trial participant (e.g., drug dose change in response to harms, participant request, or improving/worsening disease) | N/A                                                                                                                                                                                                                                                                                                                                                                                                                                                                                                                             |                        |
|               | 11c | Strategies to improve adherence to intervention                                                                                                                                                  | N/A                                                                                                                                                                                                                                                                                                                                                                                                                                                                                                                             |                        |

|                      |     |                                                                                                                                                                                                                                                                                                                                                                                      |                                                                                                                                                                                                                                                                                                                                                                                                                                                                                                                                                                                                                                               |                        |
|----------------------|-----|--------------------------------------------------------------------------------------------------------------------------------------------------------------------------------------------------------------------------------------------------------------------------------------------------------------------------------------------------------------------------------------|-----------------------------------------------------------------------------------------------------------------------------------------------------------------------------------------------------------------------------------------------------------------------------------------------------------------------------------------------------------------------------------------------------------------------------------------------------------------------------------------------------------------------------------------------------------------------------------------------------------------------------------------------|------------------------|
|                      |     | protocols, and any procedures for monitoring adherence (e.g., drug tablet return, laboratory tests)                                                                                                                                                                                                                                                                                  |                                                                                                                                                                                                                                                                                                                                                                                                                                                                                                                                                                                                                                               |                        |
|                      | 11d | Relevant concomitant care and interventions that are permitted or prohibited during the trial                                                                                                                                                                                                                                                                                        | N/A                                                                                                                                                                                                                                                                                                                                                                                                                                                                                                                                                                                                                                           |                        |
| Outcomes             | 12  | Primary, secondary, and other outcomes, including the specific measurement variable (e.g., systolic blood pressure), analysis metric (e.g., change from baseline, final value, time to event), method of aggregation (e.g., median, proportion), and time point for each outcome. Explanation of the clinical relevance of chosen efficacy and harm outcomes is strongly recommended | Outcome assessments in the present trial are intended to capture the complexity of pain based on the biopsychosocial model namely medical, psychological, and social (total life situation) factors impacting on the work situation. It has been recommended to include multiple outcomes in clinical trials for persons with CMSP to capture important domains affected by symptoms such as functioning and health-related quality of life. The primary and secondary outcomes are collected for evaluation of the clinical effectiveness of SWEPPE, and the complementary variables will be collected based on their effect on the outcome. | Page 11-16, manuscript |
| Participant timeline | 13  | Time schedule of enrollment,                                                                                                                                                                                                                                                                                                                                                         | Figure 1.                                                                                                                                                                                                                                                                                                                                                                                                                                                                                                                                                                                                                                     | Page 7, figure 1       |

|                                                               |     |                                                                                                                                                                                       |                                                                                                                                                                                                                                                                                                                                                                                                                                                                                                                                                                                                                                                                                         |                     |
|---------------------------------------------------------------|-----|---------------------------------------------------------------------------------------------------------------------------------------------------------------------------------------|-----------------------------------------------------------------------------------------------------------------------------------------------------------------------------------------------------------------------------------------------------------------------------------------------------------------------------------------------------------------------------------------------------------------------------------------------------------------------------------------------------------------------------------------------------------------------------------------------------------------------------------------------------------------------------------------|---------------------|
|                                                               |     | interventions (including any runins and washouts), assessments, and visits for participants. A schematic diagram is highly recommended (Figure).                                      |                                                                                                                                                                                                                                                                                                                                                                                                                                                                                                                                                                                                                                                                                         |                     |
| Sample size                                                   | 14  | Estimated number of participants needed to achieve study objectives and how it was determined, including clinical and statistical assumptions supporting any sample size calculations | Based on previous research regarding sick leave (45, 46) and the inclusion of participants with the goal to RTW, an estimated difference between the groups of 20 net days and an effect-size of 0.333 was set for rejection of the null hypothesis. To detect this difference with a power of 80% and a significance level of 0.05 a total sample size of 300 participants (150/group) are needed. With an allowance for 20% of participants lost to follow-up we aim to recruit a total sample size of 360 participants (n=180 intervention, n=180 control).                                                                                                                          | Page 9, manuscript  |
| Recruitment                                                   | 15  | Strategies for achieving adequate participant enrollment to reach target sample size                                                                                                  | Participants will be recruited from multiple special and primary care level health care providing IPRP for patients with chronic pain.                                                                                                                                                                                                                                                                                                                                                                                                                                                                                                                                                  | Page 9, manuscript  |
| Assignment of interventions<br>Allocation sequence generation | 16a | Method of generating the allocation sequence (e.g., computer-generated random numbers), and list of any factors for stratification. To reduce predictability of a random              | As sick leave history is a strong predictor for future sick leave (47) participants will be stratified based on self-reported number of sick leave days during the year before IPRP. Participants will be divided in high (total number of gross sick leave days $\geq 70$ ) or low sick leave absence and then randomized to intervention or control group. Allocation of the participants to intervention or control group will be conducted using a block randomization design with varying block sizes of 2-6 (48-50). The allocation sequence will be computer generated and sealed sequentially numbered opaque sealed envelopes will be prepared by one of the researchers (GL). | Page 10, manuscript |

|                                  |     |                                                                                                                                                                                                             |                                                                                                                                                                                                                                                                                                                                     |                     |
|----------------------------------|-----|-------------------------------------------------------------------------------------------------------------------------------------------------------------------------------------------------------------|-------------------------------------------------------------------------------------------------------------------------------------------------------------------------------------------------------------------------------------------------------------------------------------------------------------------------------------|---------------------|
|                                  |     | sequence, details of any planned restriction (e.g., blocking) should be provided in a separate document that is unavailable to those who enroll participants or assign interventions.                       |                                                                                                                                                                                                                                                                                                                                     |                     |
| Allocation concealment mechanism | 16b | Mechanism of implementing the allocation sequence (e.g., central telephone; sequentially numbered, opaque, sealed envelopes), describing any steps to conceal the sequence until interventions are assigned | Sealed sequentially numbered opaque envelopes will be used for implementing the allocation sequence at each participating unit.                                                                                                                                                                                                     | Page 10, manuscript |
| Implementation                   | 16c | Who will generate the allocation sequence, who will enroll participants, and who will assign participants to interventions                                                                                  | The allocation sequence will be generated by a statistician and one of the researchers (GL) will prepare sequentially numbered opaque sealed envelopes. Enrolment and assignment of participants will be performed by one of the researchers (CT) not involved in preparing the allocation sequence or the envelopes.               | Page 10, manuscript |
| Blinding                         | 17a | Who will be blinded after assignment to interventions (e.g., trial participants, care providers,                                                                                                            | Due to the nature of the intervention the participants will not be blinded to group allocation. As randomization to intervention or control group is performed at the completion of IPRP the participants will not have further contact with the health care staff responsible for IPRP or other patients. The participants will be | Page 10, manuscript |

1  
2  
3  
4  
5  
6  
7  
8  
9  
10  
11  
12  
13  
14  
15  
16  
17  
18  
19  
20  
21  
22  
23  
24  
25  
26  
27  
28  
29  
30  
31  
32  
33  
34  
35  
36  
37  
38  
39  
40  
41  
42  
43  
44  
45  
46

|                                                                      |     |                                                                                                                                                                                                                                                                                                                                                                                                                   |                                                                                                                                                                                                                                                                                                                                              |                     |
|----------------------------------------------------------------------|-----|-------------------------------------------------------------------------------------------------------------------------------------------------------------------------------------------------------------------------------------------------------------------------------------------------------------------------------------------------------------------------------------------------------------------|----------------------------------------------------------------------------------------------------------------------------------------------------------------------------------------------------------------------------------------------------------------------------------------------------------------------------------------------|---------------------|
|                                                                      |     | outcome assessors, data analysts), and how                                                                                                                                                                                                                                                                                                                                                                        | instructed not to reveal their group allocation to the health care staff responsible for IPRP or other patients if they would have further contact.                                                                                                                                                                                          |                     |
|                                                                      | 17b | If blinded, circumstances under which unblinding is permissible, and procedure for revealing a participant's allocated intervention during the trial                                                                                                                                                                                                                                                              | N/A                                                                                                                                                                                                                                                                                                                                          |                     |
| Data collection, management, and analysis<br>Data collection methods | 18a | Plans for assessment and collection of outcome, baseline, and other trial data, including any related processes to promote data quality (e.g., duplicate measurements, training of assessors) and a description of study instruments (e.g., questionnaires, laboratory tests) along with their reliability and validity, if known. Reference to where data collection forms can be found, if not in the protocol. | Data collection for the present trial will start when the IPRP is completed (baseline) and at 12 months follow-up (study ending). Data will be collected from the Swedish Social Insurance Agency's SSIA, the SQRP for specialist and primary care level, supplementary questionnaires to the SQRP, and data registered in SWEPPE (table 1). | Page 16, manuscript |

|                     |     |                                                                                                                                                                                                                                                                      |                                                                                                                                                                                                                                                                                                                                                                                                                                                                                        |                        |
|---------------------|-----|----------------------------------------------------------------------------------------------------------------------------------------------------------------------------------------------------------------------------------------------------------------------|----------------------------------------------------------------------------------------------------------------------------------------------------------------------------------------------------------------------------------------------------------------------------------------------------------------------------------------------------------------------------------------------------------------------------------------------------------------------------------------|------------------------|
|                     | 18b | Plans to promote participant retention and complete follow-up, including list of any outcome data to be collected for participants who discontinue or deviate from intervention protocols                                                                            | Data collection for the SQRP is routinely performed when the IPRP is completed and at 12 months follow-up at both primary and specialized care units in Sweden providing IPRP. The supplementary questionnaires will be added to these routine data collections for the SQRP.                                                                                                                                                                                                          | Page 16, manuscript    |
| Datamanagement      | 19  | Plans for data entry, coding, security, and storage, including any related processes to promote data quality (e.g., double data entry; range checks for data values). Reference to where details of data management procedures can be found, if not in the protocol. | A data management plan (DMP) will be developed by the principal investigator and co-workers and will include a description of research data, information about documentation and quality control of research data, storage and back-up copying of research data, legal and ethical aspects, accessibility and long-term preservation of research data, and responsibility and resources related to the research data.                                                                  | Page 16-17, manuscript |
| Statistical methods | 20a | Statistical methods for analyzing primary and secondary outcomes. Reference to where other details of the statistical analysis plan can be found, if not in the protocol.                                                                                            | A statistical analysis plan will be developed with details of statistical analyses, handling of missing data and other possible analyses for example subgroups. Descriptive statistical analyses will be performed for reporting of participant characteristics. The clinical effectiveness off SWEPEPE will be analysed using uni- and multivariate statistical analyses as a preliminary plan. All p-values will be presented and a p-value of <0.05 will be considered significant. | Page 17, manuscript    |

1  
2  
3  
4  
5  
6  
7  
8  
9  
10  
11  
12  
13  
14  
15  
16  
17  
18  
19  
20  
21  
22  
23  
24  
25  
26  
27  
28  
29  
30  
31  
32  
33  
34  
35  
36  
37  
38  
39  
40  
41  
42  
43  
44  
45  
46

|                 |     |                                                                                                                                                                                                                                                                                                            |                                                                                                                                                                                                                                                                                                                                |                     |
|-----------------|-----|------------------------------------------------------------------------------------------------------------------------------------------------------------------------------------------------------------------------------------------------------------------------------------------------------------|--------------------------------------------------------------------------------------------------------------------------------------------------------------------------------------------------------------------------------------------------------------------------------------------------------------------------------|---------------------|
|                 | 20b | Methods for any additional analyses (e.g., subgroup and adjusted analyses)                                                                                                                                                                                                                                 | A statistical analysis plan will be developed with details of statistical analyses, handling of missing data and any additional analyses, for example subgroup and adjusted analyses.                                                                                                                                          | Page 17, manuscript |
|                 | 20c | Definition of analysis population relating to protocol nonadherence (e.g., as-randomized analysis), and any statistical methods to handle missing data (e.g., multiple imputation)                                                                                                                         | Data from primary and secondary outcomes will be analysed according to intention-to-treat.                                                                                                                                                                                                                                     | Page 17, manuscript |
| Data monitoring | 21a | Composition of DMC; summary of its role and reporting structure; statement of whether it is independent from the sponsor and competing interests; and reference to where further details about its charter can be found, if not in the protocol. Alternatively, an explanation of why a DMC is not needed. | All data in the trial will be monitored regularly. Since no sponsors or competing interests exists, monitoring of data will be performed independently. To ensure proper handling and storing of data (structure, organization, file naming), the DMP will be reviewed regularly by the principal investigator and co-workers. | Page 17, manuscript |
|                 | 21b | Description of any interim analyses and stopping guidelines, including who will have access to these                                                                                                                                                                                                       | N/A                                                                                                                                                                                                                                                                                                                            |                     |

|                                                      |    |                                                                                                                                                                                   |                                                                                                                                                                                                                                                                                                                                                                                                                                                                                                                   |                     |
|------------------------------------------------------|----|-----------------------------------------------------------------------------------------------------------------------------------------------------------------------------------|-------------------------------------------------------------------------------------------------------------------------------------------------------------------------------------------------------------------------------------------------------------------------------------------------------------------------------------------------------------------------------------------------------------------------------------------------------------------------------------------------------------------|---------------------|
|                                                      |    | interim results and make the final decision to terminate the trial                                                                                                                |                                                                                                                                                                                                                                                                                                                                                                                                                                                                                                                   |                     |
| Harms                                                | 22 | Plans for collecting, assessing, reporting, and managing solicited and spontaneously reported adverse events and other unintended effects of trial interventions or trial conduct | SWEPPE can be assumed not to create adverse events and is considered a safe intervention. Nevertheless, all participants will be encouraged to report any adverse events or unintended effects of trial intervention or trial conduct such as unexpected side effects or deterioration of symptoms.                                                                                                                                                                                                               | Page 18, manuscript |
| Auditing                                             | 23 | Frequency and procedures for auditing trial conduct, if any, and whether the process will be independent from investigators and the sponsor                                       | To facilitate adherence to the study protocol the project coordinator (CT) will have regular contact (every second week) with the participating units during the study period. Processes to be reviewed are participant screening and eligibility. Documentation of the recruitment and randomization/allocation process, for example eligible patients asked to participate, the number of patients included, excluded or declining participation, performed by CT will be reviewed by the researchers (GL, MB). | Page 18, manuscript |
| Ethics and dissemination<br>Research ethics approval | 24 | Plans for seeking REC/IRB approval                                                                                                                                                | The study is approved by the Swedish Ethics Review Board (Dnr 2020-01593, Dnr 2021-01854).                                                                                                                                                                                                                                                                                                                                                                                                                        | Page 18, manuscript |
| Protocol amendments                                  | 25 | Plans for communicating important protocol modifications (e.g., changes to eligibility criteria, outcomes,                                                                        | Any important modifications of the study protocol will be communicated to the Swedish Ethics Review Board and to the participants                                                                                                                                                                                                                                                                                                                                                                                 | Page 18, manuscript |



|                         |     |                                                                                                                                                                                      |                                                                                          |                     |
|-------------------------|-----|--------------------------------------------------------------------------------------------------------------------------------------------------------------------------------------|------------------------------------------------------------------------------------------|---------------------|
|                         |     | analyses) to relevant parties (e.g., investigators, RECs/IRBs, trial participants, trial registries, journals, regulators)                                                           |                                                                                          |                     |
| Consent or assent       | 26a | Who will obtain informed consent or assent from potential trial participants or authorized surrogates, and how (see item 32)                                                         | Informed consent will be collected from all participants by one of the researchers (CT). | Page 18, manuscript |
|                         | 26b | Additional consent provisions for collection and use of participant data and biological specimens in ancillary studies, if applicable                                                | N/A                                                                                      |                     |
| Confidentiality         | 27  | How personal information about potential and enrolled participants will be collected, shared, and maintained in order to protect confidentiality before, during, and after the trial | Confidentiality will be protected by coding of individual participants' collected data.  | Page 18, manuscript |
| Declaration of interest | 28  | Financial and other competing interests for principal                                                                                                                                | The authors have no competing interests to declare.                                      | Page 19, manuscript |

|                                   |     |                                                                                                                                                                                                                                                                                        |                                                                                                                                                                                                 |                     |
|-----------------------------------|-----|----------------------------------------------------------------------------------------------------------------------------------------------------------------------------------------------------------------------------------------------------------------------------------------|-------------------------------------------------------------------------------------------------------------------------------------------------------------------------------------------------|---------------------|
|                                   |     | investigators for the overall trial and each study site                                                                                                                                                                                                                                |                                                                                                                                                                                                 |                     |
| Access to data                    | 29  | Statement of who will have access to the final trial data set, and disclosure of contractual agreements that limit such access for investigators                                                                                                                                       | Data will be stored at a password protected project server at Linköping University and will not be accessed by unauthorized persons.                                                            | Page 18, manuscript |
| Ancillary and post-treatment care | 30  | Provisions, if any, for ancillary and post-trial care, and for compensation to those who suffer harm from trial participation                                                                                                                                                          | N/A                                                                                                                                                                                             |                     |
| Dissemination policy              | 31a | Plans for investigators and sponsor to communicate trial results to participants, health care professionals, the public, and other relevant groups (e.g., via publication, reporting in results databases, or other data-sharing arrangements), including any publication restrictions | The study results will be submitted to peer-review journals for publication and will be presented in national and international research networks, clinical settings, and patient associations. | Page 18, manuscript |

1  
2  
3  
4  
5  
6  
7  
8  
9  
10  
11  
12  
13  
14  
15  
16  
17  
18  
19  
20  
21  
22  
23  
24  
25  
26  
27  
28  
29  
30  
31  
32  
33  
34  
35  
36  
37  
38  
39  
40  
41  
42  
43  
44  
45  
46

|                                      |     |                                                                                                                                                                                                |                                                                                                                                                                 |                        |
|--------------------------------------|-----|------------------------------------------------------------------------------------------------------------------------------------------------------------------------------------------------|-----------------------------------------------------------------------------------------------------------------------------------------------------------------|------------------------|
|                                      | 31b | Authorship eligibility guidelines and any intended use of professional writers                                                                                                                 | N/A                                                                                                                                                             |                        |
|                                      | 31c | Plans, if any, for granting public access to the full protocol, participant-level data set, and statistical code                                                                               | The study protocol will be available via Clinicaltrial.gov. There is no present plan regarding public access of participant-level data set or statistical code. | Page 18-19, manuscript |
| Appendices Informed consent material | 32  | Model consent form and other related documentation given to participants and authorized surrogates                                                                                             | The consent form is design based on the Ethics committee recommendation and includes written information about the study.                                       | Page 18, manuscript.   |
| Biological specimens                 | 33  | Plans for collection, laboratory evaluation, and storage of biological specimens for genetic or molecular analysis in the current trial and for future use in ancillary studies, if applicable | N/A                                                                                                                                                             |                        |

## S2. Overview of the study in relation to the World Health Organization (WHO) trial registration data set.

| WHO item | Item description                              | Study description                                                                                                                                                                                             | Page number where item can be found. |
|----------|-----------------------------------------------|---------------------------------------------------------------------------------------------------------------------------------------------------------------------------------------------------------------|--------------------------------------|
| 1.       | Primary registry and trial identifying number | Primary registry at ClinicalTrials.gov registration number NCT05058547                                                                                                                                        | Page 4, manuscript                   |
| 2.       | Date of registration in primary registry      | 27 September 2021                                                                                                                                                                                             | Page 4, manuscript                   |
| 3.       | Secondary identifying numbers                 | The Swedish Research Council for Health, Working Life and Welfare: Dnr 2019-01264<br>The Swedish Ethics Review Board: Dnr 2020-01593, Dnr 2021-01854                                                          | Page 18-19, manuscript               |
| 4.       | Sources of monetary or material support       | The Swedish Research Council for Health, Working Life and Welfare: Dnr 2019-01264                                                                                                                             | Page 19, manuscript                  |
| 5.       | Primary sponsor                               | Linköping University                                                                                                                                                                                          | Page 1, manuscript                   |
| 6.       | Secondary sponsor(s)                          | N/A                                                                                                                                                                                                           |                                      |
| 7.       | Contact for public queries                    | <a href="mailto:Mathilda.bjork@liu.se">Mathilda.bjork@liu.se</a><br>+4611363531<br>Linköping University<br>581 83 Linköping<br>Sweden<br>Recruitment status: not yet recruiting                               | Page 1, manuscript                   |
| 8.       | Contact for scientific queries                | Mathilda Björk<br><a href="mailto:Mathilda.bjork@liu.se">Mathilda.bjork@liu.se</a><br>+4611363531<br>Department of Health, Medicine and Caring Sciences<br>Linköping University<br>581 83 Linköping<br>Sweden | Page 1, manuscript                   |
| 9.       | Public title                                  | An evidence-based digital support during one year after an Interdisciplinary Pain Rehabilitation Program for persons with chronic musculoskeletal pain to facilitate a                                        | Page 1, manuscript                   |

|     |                                      |                                                                                                                                                                                                                                                                                                                                                                                                                                                                                                                                                                                                                                                                                                                                                                                                                                                                                                                                                                                                                                                                                                                                                                                          |                        |
|-----|--------------------------------------|------------------------------------------------------------------------------------------------------------------------------------------------------------------------------------------------------------------------------------------------------------------------------------------------------------------------------------------------------------------------------------------------------------------------------------------------------------------------------------------------------------------------------------------------------------------------------------------------------------------------------------------------------------------------------------------------------------------------------------------------------------------------------------------------------------------------------------------------------------------------------------------------------------------------------------------------------------------------------------------------------------------------------------------------------------------------------------------------------------------------------------------------------------------------------------------|------------------------|
|     |                                      | sustainable return to work: a study protocol for a registry-based multicentre randomized controlled trial.                                                                                                                                                                                                                                                                                                                                                                                                                                                                                                                                                                                                                                                                                                                                                                                                                                                                                                                                                                                                                                                                               |                        |
| 10. | Scientific title                     | An evidence-based digital support during one year after an Interdisciplinary Pain Rehabilitation Program for persons with chronic musculoskeletal pain to facilitate a sustainable return to work: a study protocol for a registry-based multicentre randomized controlled trial.                                                                                                                                                                                                                                                                                                                                                                                                                                                                                                                                                                                                                                                                                                                                                                                                                                                                                                        | Page 1, manuscript     |
| 11. | Countries of recruitment             | Sweden                                                                                                                                                                                                                                                                                                                                                                                                                                                                                                                                                                                                                                                                                                                                                                                                                                                                                                                                                                                                                                                                                                                                                                                   | Page 7, manuscript     |
| 12. | Health condition                     | Chronic pain                                                                                                                                                                                                                                                                                                                                                                                                                                                                                                                                                                                                                                                                                                                                                                                                                                                                                                                                                                                                                                                                                                                                                                             | Page 7, manuscript     |
| 13. | Intervention                         | <p>Participants randomized to the intervention group will receive the smartphone application SWEPE to use as a digital support during the RTW process. SWEPE is a smartphone application where the individual can create an action plan, perform daily registrations of health aspects, self-monitoring of health aspects and goals, have access to a library with evidence-based facts and a coach, and possibility to share information with the employer. The intervention starts at the end of the IPRP with self-rating of work conditions and goal setting in SWEPE. The participants will use SWEPE for 12 months. Data registered in SWEPE by the participant about their goal, work condition and self-rating will be stored in the application and used for self-monitoring and visualizing progress for the participant. The participant invites his/her employer/employers to access the web application SWEPE depending on what information the participant wants to share with the employer. The employer will receive e-mail reminders to use SWEPE.</p> <p>Participants randomized to the control group will not receive any active intervention for RTW after IPRP.</p> | Page 10-11, manuscript |
| 14. | Key inclusion and exclusion criteria | <p>Inclusion Criteria:</p> <p>Patients entering the trial must have completed IPRP<sup>a</sup>. The principal inclusion criteria for IPRP in Sweden are:</p> <ul style="list-style-type: none"> <li>• persistent or intermittent pain lasting <math>\geq 3</math> months</li> <li>• pain affecting daily activities to a large extent,</li> <li>• completed systematic assessment and non-pharmacological optimization is completed,</li> <li>• screening for psychosocial risk factors and differential diagnosis completed</li> </ul> <p>In addition, the following criteria will be applied:</p> <ul style="list-style-type: none"> <li>• Age 18-65 years</li> </ul>                                                                                                                                                                                                                                                                                                                                                                                                                                                                                                                  | Page 8, manuscript     |

|     |                          |                                                                                                                                                                                                                                                                                                                                                                                                                                                                                                                                                                                                                                                                                                                                                                                                                                                                                                                                        |                        |
|-----|--------------------------|----------------------------------------------------------------------------------------------------------------------------------------------------------------------------------------------------------------------------------------------------------------------------------------------------------------------------------------------------------------------------------------------------------------------------------------------------------------------------------------------------------------------------------------------------------------------------------------------------------------------------------------------------------------------------------------------------------------------------------------------------------------------------------------------------------------------------------------------------------------------------------------------------------------------------------------|------------------------|
|     |                          | <ul style="list-style-type: none"> <li>Completed participation in an Interdisciplinary Pain Rehabilitation Program (IPRP) at any of the participating units.</li> <li>Having an employment to return to after IPRP or having returned to work but need continued support for creating a sustainable work situation after IPRP.</li> </ul> <p>Exclusion criteria:</p> <ul style="list-style-type: none"> <li>Completed IPRP but are unemployed or unable to return to work.</li> </ul>                                                                                                                                                                                                                                                                                                                                                                                                                                                  |                        |
| 15. | Study type               | Registry-based randomized controlled trial. Stratification of sick leave history during the year before IPRP and block-randomization, using opaque sealed and numbered envelopes, to intervention (SWEPEE) or control group. Due to the nature of the intervention the participants will not be blinded to group allocation.                                                                                                                                                                                                                                                                                                                                                                                                                                                                                                                                                                                                           | Page 7, manuscript     |
| 16. | Date of first enrolment  | Anticipated to spring 2022.                                                                                                                                                                                                                                                                                                                                                                                                                                                                                                                                                                                                                                                                                                                                                                                                                                                                                                            | Page 16, manuscript    |
| 17. | Target sample size       | Total number of participants: 360                                                                                                                                                                                                                                                                                                                                                                                                                                                                                                                                                                                                                                                                                                                                                                                                                                                                                                      | Page 9, manuscript     |
| 18. | Recruitment status       | Pending                                                                                                                                                                                                                                                                                                                                                                                                                                                                                                                                                                                                                                                                                                                                                                                                                                                                                                                                | Page 4, manuscript     |
| 19. | Primary outcome(s)       | Sick leave. Time Frame: 12 months follow up after IPRP.<br>Number of gross and net days with sickness cash benefit                                                                                                                                                                                                                                                                                                                                                                                                                                                                                                                                                                                                                                                                                                                                                                                                                     | Page 12, manuscript    |
| 20. | Key secondary outcome(s) | <ol style="list-style-type: none"> <li>Return to work. Time Frame: 12 months follow up after IPRP. Return to work (partially or full time) every month</li> <li>Sick-leave spells per months. Time Frame: 12 months follow up after IPRP. Number of sick-leave spells (per month)</li> <li>Return to work group level. Time Frame: 12 months follow up after IPRP. Proportions of a group who returns to full- or part-time work (per month)</li> <li>Working days before new sick leave. Time Frame: 12 months follow up after IPRP. Number of days in work before new sick leave during study period</li> <li>Proportion back to work. Time Frame: 12 months follow up after IPRP. Proportion of a group back to work &gt;28 days (full- or part time) before a new sick-leave spell occurs</li> <li>Total sick-leave spells. Time Frame: 12 months follow up after IPRP. Number of sick-leave spells during study period</li> </ol> | Page 12-16, manuscript |

1  
2  
3  
4  
5  
6  
7  
8  
9  
10  
11  
12  
13  
14  
15  
16  
17  
18  
19  
20  
21  
22  
23  
24  
25  
26  
27  
28  
29  
30  
31  
32  
33  
34  
35  
36  
37  
38  
39  
40  
41  
42  
43  
44  
45  
46

|  |  |                                                                                                                                                                                                                                                                                                                                                                                                                                                                                                                                                                                                                                                                                                                                                                                                                                                                                                                                                                                                                                                                                                                                                                                                                                                                                                                                                                                                                                                                                                                                                                                                                                                                                                                                                                                                                                                                                                                                                                                         |  |
|--|--|-----------------------------------------------------------------------------------------------------------------------------------------------------------------------------------------------------------------------------------------------------------------------------------------------------------------------------------------------------------------------------------------------------------------------------------------------------------------------------------------------------------------------------------------------------------------------------------------------------------------------------------------------------------------------------------------------------------------------------------------------------------------------------------------------------------------------------------------------------------------------------------------------------------------------------------------------------------------------------------------------------------------------------------------------------------------------------------------------------------------------------------------------------------------------------------------------------------------------------------------------------------------------------------------------------------------------------------------------------------------------------------------------------------------------------------------------------------------------------------------------------------------------------------------------------------------------------------------------------------------------------------------------------------------------------------------------------------------------------------------------------------------------------------------------------------------------------------------------------------------------------------------------------------------------------------------------------------------------------------------|--|
|  |  | <ol style="list-style-type: none"> <li>7. Length of total sick leave. Time Frame: 12 months follow up after IPRP. Length of total sick leave during study period</li> <li>8. Pain intensity last 7 days. Time Frame: Baseline and 12 months. Numeric pain rating scale.</li> <li>9. Consequences of pain on daily life. Time Frame: Baseline and 12 months. Multidimensional Pain Inventory Swedish version.</li> <li>10. Overall emotional distress. Time Frame: Baseline and 12 months. Hospital Anxiety and Depression Scale Swedish version.</li> <li>11. Physical and mental health. Time Frame: Baseline and 12 months. RAND-36 Swedish version.</li> <li>12. Goal fulfilment and satisfaction during the study period. Time Frame: Baseline and 12 months.</li> </ol> <p>Explanatory Outcome Measures:</p> <ol style="list-style-type: none"> <li>1. Self-reported fatigue the last 7 days. Time Frame: Baseline and 12 months. Numeric fatigue rating scale.</li> <li>2. Self-reported insomnia. Time Frame: Baseline and 12 months. Insomnia Severity Index Swedish version.</li> <li>3. Self-reported fear of movement. Time Frame: Baseline and 12 months. Tampa Scale for Kinesiophobia Swedish version.</li> <li>4. Self-reported physical activity. Time Frame: Baseline and 12 months. The National Board of Health and Welfare's three questions on physical activity, exercise, and sedentary behavior.</li> <li>5. Pain catastrophizing. Time Frame: Baseline and 12 months. Pain Catastrophizing scale Swedish version.</li> <li>6. Perceived work ability. Time Frame: Baseline and 12 months. Work Ability Index Swedish version.</li> <li>7. Self-reported demands, control, and support at the workplace. Time Frame: Baseline and 12 months. Demand Control Support Questionnaire Swedish version.</li> <li>8. Self-reported physical work environment using a questionnaire inspired by the Swedish Work Environment Authority ergonomics checklist</li> </ol> |  |
|--|--|-----------------------------------------------------------------------------------------------------------------------------------------------------------------------------------------------------------------------------------------------------------------------------------------------------------------------------------------------------------------------------------------------------------------------------------------------------------------------------------------------------------------------------------------------------------------------------------------------------------------------------------------------------------------------------------------------------------------------------------------------------------------------------------------------------------------------------------------------------------------------------------------------------------------------------------------------------------------------------------------------------------------------------------------------------------------------------------------------------------------------------------------------------------------------------------------------------------------------------------------------------------------------------------------------------------------------------------------------------------------------------------------------------------------------------------------------------------------------------------------------------------------------------------------------------------------------------------------------------------------------------------------------------------------------------------------------------------------------------------------------------------------------------------------------------------------------------------------------------------------------------------------------------------------------------------------------------------------------------------------|--|

|     |                                                                           |                                                                                                                                                                                                                                                                                                                                                                                                                                                                                                                                                                                                                                                                                                                                                                 |                        |
|-----|---------------------------------------------------------------------------|-----------------------------------------------------------------------------------------------------------------------------------------------------------------------------------------------------------------------------------------------------------------------------------------------------------------------------------------------------------------------------------------------------------------------------------------------------------------------------------------------------------------------------------------------------------------------------------------------------------------------------------------------------------------------------------------------------------------------------------------------------------------|------------------------|
|     |                                                                           | <p>9. Perceived life Satisfaction. Time Frame: Baseline and 12 months. Life satisfaction Scale Swedish version.</p> <p>10. Self-reported work situation during the study period. Time Frame: Baseline and 12 months. Barriers for return to work, strategies to handle barriers and need of support from the employer reported as text answer.</p> <p>11. Self-reported workload an average day. Time Frame: Baseline and 12 months. Number of hours per day for paid work and unpaid household work.</p> <p><b>Data collected from SWEPPE</b><br/>Mobile app usage, for example number of participants using the app, performing daily self-rating, sharing information with the employer, or asking questions to the coach will be retrieved from SWEPPE.</p> |                        |
| 21. | Ethics review                                                             | Approved                                                                                                                                                                                                                                                                                                                                                                                                                                                                                                                                                                                                                                                                                                                                                        | Page 18, manuscript    |
| 22. | Completion date                                                           | After the last subject's last visit.                                                                                                                                                                                                                                                                                                                                                                                                                                                                                                                                                                                                                                                                                                                            | Page 16, manuscript    |
| 23. | Summary results                                                           | Summary results will be provided when the trial is completed.                                                                                                                                                                                                                                                                                                                                                                                                                                                                                                                                                                                                                                                                                                   | Page 18, manuscript    |
| 24. | IPD sharing statement (individual clinical trial participant- level data) | Not planned to share individual clinical trial participant- level data (IPD)                                                                                                                                                                                                                                                                                                                                                                                                                                                                                                                                                                                                                                                                                    | Page 18-19, manuscript |



# BMJ Open

**An evidence-based digital support during one year after an Interdisciplinary Pain Rehabilitation Program for persons with chronic musculoskeletal pain to facilitate a sustainable return to work: a study protocol for a registry-based multicentre randomized controlled trial.**

|                                 |                                                                                                                                                                                                                                                                                                                                                                                                                                                                                                |
|---------------------------------|------------------------------------------------------------------------------------------------------------------------------------------------------------------------------------------------------------------------------------------------------------------------------------------------------------------------------------------------------------------------------------------------------------------------------------------------------------------------------------------------|
| Journal:                        | <i>BMJ Open</i>                                                                                                                                                                                                                                                                                                                                                                                                                                                                                |
| Manuscript ID                   | bmjopen-2021-060452.R1                                                                                                                                                                                                                                                                                                                                                                                                                                                                         |
| Article Type:                   | Protocol                                                                                                                                                                                                                                                                                                                                                                                                                                                                                       |
| Date Submitted by the Author:   | 01-Apr-2022                                                                                                                                                                                                                                                                                                                                                                                                                                                                                    |
| Complete List of Authors:       | Turesson, Christina; Linköping University Department of Health Medicine and Caring Sciences<br>Liedberg, Gunilla; Linköping University Department of Health Medicine and Caring Sciences<br>Vixner, Linda; Dalarna University, School of Health and Welfare<br>Lofgren, Monika; Karolinska Institutet, Department of Clinical Sciences and Department of Rehabilitation Medicine Danderyd Hospital<br>Björk, Mathilda ; Linköping University Department of Health Medicine and Caring Sciences |
| <b>Primary Subject Heading</b>: | Rehabilitation medicine                                                                                                                                                                                                                                                                                                                                                                                                                                                                        |
| Secondary Subject Heading:      | Rehabilitation medicine                                                                                                                                                                                                                                                                                                                                                                                                                                                                        |
| Keywords:                       | Clinical trials < THERAPEUTICS, PAIN MANAGEMENT, REHABILITATION MEDICINE                                                                                                                                                                                                                                                                                                                                                                                                                       |
|                                 |                                                                                                                                                                                                                                                                                                                                                                                                                                                                                                |

SCHOLARONE™  
Manuscripts

**TITLE**

An evidence-based digital support during one year after an Interdisciplinary Pain Rehabilitation Program for persons with chronic musculoskeletal pain to facilitate a sustainable return to work: a study protocol for a registry-based multicentre randomized controlled trial.

**AUTHORS**

Christina Turesson<sup>1</sup>, Gunilla Liedberg<sup>1</sup>, Linda Vixner<sup>2</sup>, Monika Löfgren<sup>3</sup>, Mathilda Björk<sup>4</sup>

**Affiliations:**

1. Division of Prevention, Rehabilitation and Community Medicine, Department of Health, Medicine and Caring Sciences, Linköping University, Linköping, Sweden
2. School of Health and Welfare, Dalarna University, Falun, Sweden
3. Karolinska Institutet, Department of Clinical Sciences and Department of Rehabilitation Medicine Danderyd Hospital, 182 88 Stockholm
4. Pain and Rehabilitation Centre, Department of Health, Medicine and Caring Sciences, Linköping University, Linköping, Sweden

**Corresponding author:**

Christina Turesson

Department of Health, Medicine and Caring Sciences

Division of Prevention, Rehabilitation and Community Medicine

Unit of Occupational therapy

601 74 Norrköping

1  
2  
3 SWEDEN  
4

5 [christina.turesson@liu.se](mailto:christina.turesson@liu.se)  
6

7  
8 +46 11363602  
9

10  
11  
12  
13  
14  
15 **Word count: 3954**  
16  
17  
18  
19  
20  
21  
22  
23  
24  
25  
26  
27  
28  
29  
30  
31  
32  
33  
34  
35  
36  
37  
38  
39  
40  
41  
42  
43  
44  
45  
46  
47  
48  
49  
50  
51  
52  
53  
54  
55  
56  
57  
58  
59  
60

For peer review only

## ABSTRACT

### Introduction

Chronic musculoskeletal pain severely affects the individual's quality of life, functioning and ability to work, and comes with significant societal costs for sick leave and productivity loss.

After rehabilitation, patients with chronic musculoskeletal pain often experience lack of support when responsibility for the return-to-work process is taken over by the employer.

Therefore, we aim to evaluate the effectiveness of a digital support (SWEPPPE) for promoting a sustainable return-to-work for persons with chronic musculoskeletal pain and to facilitate the employers' supportive role and responsibilities in the process.

### Methods and analysis

In this registry-based multicentre randomized controlled trial, 360 patients with chronic musculoskeletal pain will be randomised to either receive the smartphone application SWEPPPE (n=180) or to a control group (n=180). The intervention group will use SWEPPPE for one year and the control group will not receive any intervention for return to work.

Participants will be recruited from approximately ten specialist and primary care level units connected to the Swedish National Quality Registry for Pain Rehabilitation providing interdisciplinary pain rehabilitation programs for chronic musculoskeletal pain. Eligibility criteria are age 18-65 years and a need for support in return to work or continued support at work for creating a sustainable work situation. Baseline data will be collected when the participants have completed the interdisciplinary pain rehabilitation program. Final assessment will be performed after twelve months. The primary outcome will be number of days with sickness cash benefit. Secondary outcomes and explanatory variables including important domains affected by chronic musculoskeletal pain such as health-related quality of life, functioning and work ability will be collected.

### Ethics and dissemination

1  
2  
3 The Swedish Ethics Review Board approved the study (Dnr 2020-01593, Dnr 2021-01854).

4  
5 The study findings will be disseminated through publication, national and international  
6  
7 conferences, and meetings to be available for patients, health care providers or stakeholders.  
8  
9

### 10 **Registration details**

11  
12 ClinicalTrials.gov registration number NCT05058547 (Pre-results, not yet recruiting). Version  
13  
14 1. 27 September 2021.  
15  
16

### 17 **Strengths and limitations of this study**

- 18  
19
- 20 • Using a shared smartphone application (SWEPPE) to facilitate self-management, and  
21 communication and collaboration between persons with chronic musculoskeletal pain  
22 and their employer during the return-to-work process is a novel intervention with the  
23 potential to support a sustainable work situation.  
24  
25
  - 26 • A registry-based multicentre randomized trial will provide rigorous evidence regarding  
27 clinical effectiveness of the intervention.  
28  
29
  - 30 • In this trial the primary and secondary outcomes are based on recommendation from  
31 the Swedish Social Insurance Agency regarding outcomes for return-to-work which  
32 ensures capturing relevant aspects of sick-leave.  
33  
34
  - 35 • It is important to be aware of the risk for selection bias due to patients' self-confidence  
36 or willingness to use smartphone applications.  
37  
38
  - 39 • A study limitation is the lack of blinding to group allocation and the control groups  
40 awareness of not receiving the intervention.  
41  
42  
43  
44  
45  
46  
47  
48  
49  
50  
51

52 **Key words:** clinical trials, musculoskeletal disorders, pain management, rehabilitation  
53  
54  
55 medicine.  
56  
57  
58  
59  
60

## INTRODUCTION

Chronic musculoskeletal pain (CMSP) (i.e., pain duration >3 months) such as chronic neck/shoulder and back pain or generalized widespread pain (including fibromyalgia (FM)) has a prevalence from 10.4% [1] to 20% among adults.[1-3] CMSP negatively impact quality of life, functioning and the ability to work.[2] CMSP also causes considerable costs for the society in terms of sick leave expenses and loss of productivity.[1,2,4-8] Many patients with CMSP participate in Interdisciplinary Pain Rehabilitation Programs (IPRP) to enable self-management of pain and increase the ability to work.[9-11] After completing a rehabilitation program for persons with CMSP the patients can experience lack of support when the employer takes over the responsibility for the return to work (RTW) process.[12] The employers have a crucial role in a successful RTW process [13-15] but may lack knowledge regarding chronic pain and its consequences [16] and how to support the employee with CMSP in the best way during RTW.[12] Barriers for RTW for persons with CMSP are for example lack of support at the workplace, not finding the right fit between the employee's physical abilities and work tasks, or problems with relationships with supervisors or coworkers.[17,18] Key factors for a successful RTW are communication and collaboration between the employer and the employee.[19] Further, employers also need to use active listening skills which means enhancing conversation using open questions and demonstrate effective listening by summary statements.[20] To facilitate the important interaction between employer and employee[21,22] a shared smartphone application may be a tool for increasing a successful outcome in the RTW process.

A primary aim of IPRP is to reach RTW.[9,10] To fill the gap patients with CMSP experience when the RTW process continues after completing IPRP [12], the digital support A Sustainable WorkEr- digital support for Persons with chronic Pain and their Employers

1  
2  
3 (SWEPPPE) was systematically developed.[23] SWEPPPE is a smartphone application for  
4 persons with CMSP with the possibility to invite and share information with the employer.  
5  
6 SWEPPPE was developed by a multidisciplinary project team consisting of health care  
7  
8 researchers, a user representative, and a software team. A user-centred agile approach [24]  
9  
10 was used with continuous involvement of two reference groups consisting of persons with  
11  
12 CMSP and employers providing feedback on the functions and the interface in SWEPPPE.  
13  
14 Smart phone applications as digital support has shown promising results for persons with  
15  
16 chronic pain [25-27] and can be helpful especially in an out-clinic setting.[28] They are easily  
17  
18 accessed, can enable management of the condition [29], and reduce pain interference.[30] An  
19  
20 evidence-based content and a simple design are key parts for providing a successful digital  
21  
22 support.[31] Information provided via apps can improve the level of knowledge among  
23  
24 patients.[32] Focusing on self-management and empowerment are other important parts of  
25  
26 successful digital support.[33] Self-management among persons with chronic pain include  
27  
28 self-monitoring [31,34] and pain education in relation to the neuroscience of pain, medication,  
29  
30 stress, depression, and sleep management.[35] Self-monitoring can contribute to learning  
31  
32 about consequences of actions and behaviours in daily life.[36] This can lead to making  
33  
34 changes in daily activities and a sense of control and motivation for continued use of self-  
35  
36 management strategies.[37,38]  
37  
38  
39  
40  
41  
42  
43  
44  
45  
46

47 Although positive effects of digital support have been shown there are limitations related to  
48  
49 low overall quality of smartphone apps for CMSP and lack of rigorous assessment of their  
50  
51 effectiveness.[39,40] SWEPPPE was found to be useful for self-management for persons with  
52  
53 CMSP and for supporting employers, with relevant content, logical and easy to use, and with  
54  
55 a nice and clean interface.[23] However, the clinical effectiveness of SWEPPPE as a digital  
56  
57 support for employees and employers to decrease sick leave in persons with CMSP need to be  
58  
59  
60

1  
2  
3 investigated. The aim of this paper is to report the study design, aim, outcome assessment and  
4  
5 procedures for a planned registry based multicentre randomized controlled trial (R-RCT). The  
6  
7 overall objective of the R-RCT is to evaluate the clinical effectiveness of a digital support  
8  
9 (SWEPEPE) for promoting a sustainable RTW for persons with CMSP and to facilitate the  
10  
11 employers' supportive role and responsibilities in the process.  
12  
13  
14  
15  
16

## 17 **METHODS AND ANALYSIS**

### 18 **Trial design and study setting**

19  
20  
21 This protocol is reported in accordance with the Standard Protocol Items: Recommendations  
22  
23 for Interventional Trials (SPIRIT).[41] The R-RCT will conform with the Consolidated  
24  
25 Standards of Reporting Trials (CONSORT).[42,43] This is a two-armed multi-centre  
26  
27 registry-based randomized controlled trial. The study will be conducted in specialized and  
28  
29 primary level clinics in Sweden providing IPRP and reporting to the Swedish National  
30  
31 Quality Registry for Pain Rehabilitation (SQRP). Approximately 360 (n=180 intervention  
32  
33 group, n=180 control group) patients with CMSP will be recruited to participate in the study.  
34  
35  
36 Study design and enrollment details is presented in figure 1. A completed SPIRIT checklist  
37  
38 and the World Health Organization (WHO) trial registration data set [44] can be found in the  
39  
40 supplementary files (S1 and S2).  
41  
42  
43  
44  
45  
46  
47

### 48 **Patient and public involvement**

49  
50 Patients with CMSP were not involved in formulating the research question or setting the  
51  
52 research design for the planned study. However, patients with CMSP who had undergone  
53  
54 IPRP and employers participated in design and development of the intervention, the digital  
55  
56 smart phone application SWEPEPE. In addition, a user representative from the Swedish  
57  
58  
59  
60



1  
2  
3 Rheumatism Association participated as a research partner in the development process of  
4  
5 SWEPPPE.[23]  
6  
7  
8  
9

## 10 **Participants**

11  
12 Eligibility criteria for the study is that patients entering the trial must have completed an IPRP  
13  
14 for CMSP. The principal inclusion criteria for IPRP in Sweden are persistent or intermittent  
15  
16 pain lasting  $\geq 3$  months, pain affecting daily activities to a large extent, completed systematic  
17  
18 assessment and non-pharmacological optimization, and screening for psychosocial risk factors  
19  
20 and differential diagnosis completed. In this trial, patients with CMSP will be recruited based  
21  
22 on the following criteria: age between 18-65 years, completed IPRP at any of the participating  
23  
24 units, having an employment to return to after IPRP or having returned to work but need  
25  
26 continued support for creating a sustainable work situation after IPRP. Patients who have  
27  
28 completed IPRP but are unemployed or unable to return to work will be excluded.  
29  
30  
31  
32  
33  
34  
35  
36

## 37 **Recruitment**

38  
39 Units in specialized and primary care level in Sweden providing IPRP based on individualized  
40  
41 needs and who are reporting to the SQRP will be included in the study. Two of the  
42  
43 researchers (CT, MB) will invite healthcare staff (primarily occupational therapists and  
44  
45 physiotherapists but also psychologist/counselor, nurses etc.) at the participating units to  
46  
47 online digital information meetings to present the study. A contact person will be appointed at  
48  
49 each unit. One researcher (CT) will have continuous contact with the participating units  
50  
51 regarding the planned IPRP groups and screening of eligible patients for the study.  
52  
53  
54  
55  
56

57  
58 Patients with CMSP participating in IPRP at any of the study units and who is meeting the  
59  
60 inclusion criteria will be asked to take part in the study. The recruitment process will start

1  
2  
3 with screening of eligible participants in the IPRP groups. Screening of eligible participants  
4 will be performed by the health care staff providing the IPRP and will be discussed with one  
5  
6 of the researchers (CT). The health care staff will collect contact details and information  
7  
8 regarding previous sick leave during one year before starting IPRP from the eligible  
9  
10 participants and ask for permission to provide this information to the researchers. The  
11  
12 participants will at the end of IPRP receive verbal and written information about the study  
13  
14 from one of the researchers (CT) and written informed consent (S3) will be collected for those  
15  
16 willing to participate in the study. The participants will receive detailed information regarding  
17  
18 voluntary participation and the right to withdraw from the study at any time.  
19  
20  
21  
22  
23  
24  
25

## 26 **Intervention**

27  
28 The participants will be assigned to the intervention group or the control group. Participants in  
29  
30 both groups will follow the plan for return to work that has been established at the end of  
31  
32 IPRP.  
33  
34  
35  
36  
37

### 38 *Intervention group receiving SWEPPE*

39  
40 Participants randomized to the intervention group will receive the smartphone application  
41  
42 SWEPPE to use as a digital support during the RTW process. SWEPPE consist of six  
43  
44 modules to support self-management:[33] the action plan, daily self-rating of health aspects,  
45  
46 self-monitoring graphs of health aspects and goals, the coach, the library, and shared  
47  
48 information with the employer. The action plan includes setting a work-related goal,  
49  
50 identification of barriers for RTW, strategies to handle the barriers, identification of support  
51  
52 needed from the employer, and weekly evaluation. SWEPPE address pain education [35] and  
53  
54 the library provides evidence-based information about CMSP, self-management strategies,  
55  
56 and information and tools for RTW.  
57  
58  
59  
60

1  
2  
3 The intervention starts after completed IPRP with self-rating of work conditions and goal  
4 setting in SWEPE. The participants will use SWEPE for 12 months. Data registered in  
5 SWEPE by the participant about their goal, work condition and self-rating will be stored in  
6 the application and used for self-monitoring and visualizing progress for the participant. The  
7 participant invites his/her employer/employers to access the web application SWEPE  
8 depending on what information the participant wants to share with the employer. The  
9 employer will receive e-mail reminders to use SWEPE.  
10  
11  
12  
13  
14  
15  
16  
17  
18  
19  
20  
21

### 22 *Control group*

23  
24 Participants randomized to the control group will not be blinded to treatment allocation as it is  
25 not feasible. They will follow the regular procedure at any specific unit and as there is no  
26 standardized intervention for RTW after IPRP, that will mean the participants follow their  
27 planned RTW process without further support from the IPRP team. However, the patient can  
28 initiate and seek other types of health care or support during their RTW process based on their  
29 needs.  
30  
31  
32  
33  
34  
35  
36  
37  
38  
39  
40

### 41 **Allocation/Randomization**

42  
43 The unit of randomization will be the individual participants who have approved to participate  
44 in the study. One of the researchers (CT) will enroll and randomize participants who have  
45 given informed consent (S3) to participate in the study to either the intervention or control  
46 group. As sick leave history is a strong predictor for future sick leave [45] participants will be  
47 stratified into high or low sick leave history based on self-reported number of sick leave days  
48 during the year before IPRP. It has been shown that patients with low sick leave history to a  
49 larger extent are younger, have an employment, higher education and are more confident  
50 regarding recovery.[45] Participants will therefore be divided in high (total number of gross  
51  
52  
53  
54  
55  
56  
57  
58  
59  
60

1  
2  
3 sick leave days  $\geq 70$ ) or low sick leave absence [45] and then randomized to intervention or  
4 control group. Allocation of the participants to intervention or control group will be  
5 conducted using a block randomization design with varying block sizes of 2-6.[46-48] The  
6 allocation sequence will be computer generated and sealed sequentially numbered opaque  
7 sealed envelopes will be prepared by one of the researchers (GL).  
8  
9  
10  
11  
12  
13  
14  
15  
16

### 17 **Blinding**

18 Due to the nature of the intervention the participants will not be blinded to group allocation.  
19  
20 As the intervention is a smartphone application it is not feasible to give a sham intervention to  
21 the control group. Randomization to intervention or control group is performed at the  
22 completion of IPRP and the participants will not have further contact with the health care staff  
23 responsible for IPRP or other patients. However, the participants will also be instructed by the  
24 health care staff not to reveal their group allocation to the health care staff responsible for  
25 IPRP or other patients if they would have further contact.  
26  
27  
28  
29  
30  
31  
32  
33  
34  
35  
36  
37  
38

### 39 **Sample size**

40 The null hypothesis in this trial is that there will be no difference between the intervention  
41 group and the control group concerning the primary outcome sick leave. Since there is no  
42 established minimal clinical important difference regarding sick leave, the sample size  
43 calculation was inspired by previous research regarding patterns of sick leave after IPRP [49,  
44 50]. It has been shown that the distribution of sick leave among persons with chronic pain  
45 change over time from full-time to partial sick leave after IPRP [49] and sick leave are  
46 reduced with approximately 16 net days from one year before to two years after IPRP.[50]  
47  
48 Therefore, an estimated difference between the groups of 20 net days with a standard  
49 deviation of 60 and an effect-size of 0.333 was set for rejection of the null hypothesis. To  
50  
51  
52  
53  
54  
55  
56  
57  
58  
59  
60

1  
2  
3 detect this difference with a power of 80% and a significance level of 0.05 a total sample size  
4  
5 of approximately 300 participants (150/group) are needed. With an allowance for 20% of  
6  
7 participants lost to follow-up we aim to recruit a total sample size of 360 participants (n=180  
8  
9 intervention, n=180 control). To reach the target sample size, participants will be recruited  
10  
11 from multiple special and primary care level health care providing IPRP for patients with  
12  
13 chronic pain.  
14  
15

## 16 17 18 19 **Outcomes**

20  
21 Outcome assessments in the present trial are intended to capture the complexity of pain [51]  
22  
23 based on the biopsychosocial model [52] namely medical, psychological, and social (total life  
24  
25 situation) factors impacting on the work situation. It has been recommended to include  
26  
27 multiple outcomes in clinical trials for persons with CMSP to capture important domains  
28  
29 affected by symptoms such as functioning and health-related quality of life.[53,54]  
30  
31

32  
33 The primary and secondary outcomes are collected for evaluation of the clinical effectiveness  
34  
35 of SWEPE, and the complementary variables will be collected based on their effect on the  
36  
37 outcome. Personal characteristics of the participants will be collected from the SQRP for  
38  
39 specialist and primary care respectively and from supplementary questions regarding sex, age,  
40  
41 education, currently working/studying (yes, no), work importance in addition to the  
42  
43 importance of income (Five alternatives: 1) Very important, 2) Important, 3) Partially  
44  
45 important, 4) Hardly no importance, or 5) No importance), diagnosis and pain duration, sick  
46  
47 leave during one year before IPRP, and type of work.  
48  
49  
50

### 51 52 53 *Primary outcomes*

54  
55 Primary outcome is days with sickness cash benefit measured according to the Swedish Social  
56  
57 Insurance Agency's (SSIA) proposal of outcome measures of return to work:[55]  
58  
59  
60

- Number of gross and net days with sickness cash benefit during the follow-up period (mean and median values).

### Secondary outcomes

Secondary outcomes will be collected from SSIA, the SQRP for specialist and primary care respectively, supplementary questionnaires and SWEPPE. An overview of the outcome assessments and data sources is presented in table 1.

Table 1. Overview of the study period, measurement time points (t), primary and secondary outcome assessments and explanatory variables, and data sources (*italics*).

| Time point                                                                                                            | Study period    |            |                 |                |
|-----------------------------------------------------------------------------------------------------------------------|-----------------|------------|-----------------|----------------|
|                                                                                                                       | Enrollment      | Allocation | Post-allocation |                |
|                                                                                                                       | -t <sub>1</sub> | 0          | Base line       | t <sub>1</sub> |
| <b>Enrollment</b>                                                                                                     | X               |            |                 |                |
| Eligibility screen                                                                                                    | X               |            |                 |                |
| Written and verbal study information                                                                                  | X               |            |                 |                |
| Informed consent                                                                                                      | X               |            |                 |                |
| Allocation/randomization                                                                                              |                 | X          |                 |                |
| <b>Interventions</b>                                                                                                  |                 |            |                 |                |
| Intervention, SWEPPE (12 months)                                                                                      |                 |            | X               | X              |
| Control (12 months)                                                                                                   |                 |            | X               | X              |
| <b>Outcome assessments</b>                                                                                            |                 |            |                 |                |
| <i>Personal characteristics</i>                                                                                       |                 |            |                 |                |
| Sex, age, ( <i>SQRP sc and pc</i> )                                                                                   |                 |            | X               |                |
| Education ( <i>SQRP sc and pc</i> )                                                                                   |                 |            | X               |                |
| Employment, work importance and type of work ( <i>SQRP sc, supplementary questions for pc</i> )                       |                 |            | X               |                |
| Diagnosis, pain duration ( <i>SQRP sc and pc</i> )                                                                    |                 |            | X               |                |
| Sick leave during one year before IPRP ( <i>supplementary questionnaire</i> )                                         |                 |            | X               |                |
| <i>Primary outcomes</i>                                                                                               |                 |            |                 |                |
| Number of gross and net days with sickness cash benefit during the follow up period ( <i>SSIA</i> )                   |                 |            | X               | X              |
| <i>Secondary outcomes</i>                                                                                             |                 |            |                 |                |
| Return to work (partially or full time) every month ( <i>SSIA</i> )                                                   |                 |            | X               | X              |
| Number of sick-leave spells (per month) ( <i>SSIA</i> )                                                               |                 |            | X               | X              |
| Proportions of a group who returns to full- or part-time work (per month) ( <i>SSIA</i> )                             |                 |            | X               | X              |
| Number of days in work before new sick leave during study period ( <i>SSIA</i> )                                      |                 |            | X               | X              |
| Proportion of a group back to work >28 days (full- or part time) before a new sick-leave spell occurs ( <i>SSIA</i> ) |                 |            | X               | X              |
| Number of sick-leave spells during study period ( <i>SSIA</i> )                                                       |                 |            | X               | X              |

|                                                                                                                                                                   |  |  |   |   |
|-------------------------------------------------------------------------------------------------------------------------------------------------------------------|--|--|---|---|
| Length of total sick leave during study period ( <i>SSIA</i> )                                                                                                    |  |  | X | X |
| Pain intensity (last 7 days), NRS ( <i>SQRP sc and pc</i> )                                                                                                       |  |  | X | X |
| Consequences of pain on daily life, MPI-S ( <i>SQRP sc and pc</i> )                                                                                               |  |  | X | X |
| Overall emotional distress, HADS ( <i>SQRP sc and pc</i> )                                                                                                        |  |  | X | X |
| Physical and mental health, RAND-36, ( <i>SQRP sc, supplementary questionnaire for pc</i> )                                                                       |  |  | X | X |
| Goal fulfilment and satisfaction ( <i>supplementary questionnaire</i> )                                                                                           |  |  | X | X |
| <b><i>Explanatory variables</i></b>                                                                                                                               |  |  |   |   |
| Self-reported fatigue (last 7 days), NRS ( <i>supplementary question</i> )                                                                                        |  |  | X | X |
| Self-reported level of sleep disturbance, ISI ( <i>SQRP sc, supplementary questionnaire for pc</i> )                                                              |  |  | X | X |
| Self-reported fear of movement, TSK ( <i>SQRP sc, supplementary questionnaire for pc</i> )                                                                        |  |  | X | X |
| Self-reported physical activity, ( <i>SQRP sc, supplementary questionnaire for pc</i> )                                                                           |  |  | X | X |
| Pain catastrophizing, PCS ( <i>SQRP sc and pc</i> )                                                                                                               |  |  | X | X |
| Perceived work ability, WAI ( <i>SQRP sc and pc</i> )                                                                                                             |  |  | X | X |
| Self-reported demands, control, and support at the workplace, DCSQ ( <i>supplementary questionnaire</i> )                                                         |  |  | X | X |
| Physical work environment ( <i>supplementary questionnaire</i> )                                                                                                  |  |  | X | X |
| Perceived life Satisfaction, LiSat ( <i>Optional questionnaire in SQRP for sc units, supplementary questionnaire for sc units not using it and for pc units</i> ) |  |  | X | X |
| Self-reported work situation during the study period ( <i>supplementary questions</i> )                                                                           |  |  | X | X |
| Self-reported workload during the study period ( <i>supplementary questions</i> )                                                                                 |  |  | X | X |

Abbreviations: -t<sup>1</sup> = pre recruitment period, t<sup>1</sup> = completed study period and follow-up 12 months after completed interdisciplinary pain rehabilitation program. SQRP= Swedish national Quality Registry for Pain rehabilitation. Sc=specialist care level. Pc=primary care level. NRS = Numeric Pain/Fatigue Rating Scale. MPI-S = Multidimensional Pain Inventory Swedish version. HADS = Hospital anxiety and Depression Scale. TSK = Fear-avoidance Tampa scale for Kinesiophobia. SSIA = Swedish Social Insurance Agency. PCS = Pain Catastrophizing Scale. WAI = Work Ability Index. DCSQ = The Swedish Demand-Control-Support Questionnaire. LiSat = Life Satisfaction Scale.

### Secondary outcomes from SSIA:

- Frequencies of individuals in a group who return to full- or part-time work.
- Number of sick-leave spells (per month).
- Proportions of a group who returns to full- or part-time work (per month).
- Number of days at work before a new sick-leave spell >14 days occurs (in current diagnosis and in total for all diagnoses).
- Proportions of a group who is back to work >28 days (full- or part time) before a new sick-leave spell occurs.
- Number of new sick-leave spells during the study period.

- Duration of new sick-leave spells per person (gross and net days).[55]

### Secondary outcomes from SQRP for specialist and primary care, and supplementary

#### questionnaires:

- Pain intensity during the last seven days estimated with the Numeric Pain Rating Scale (NRS, 0-10).[56]
- Consequences of pain on daily life measured with the Multidimensional Pain Inventory Scale Swedish version, section 1 and 2 (MPI-S, 0 - 6).[57,58]
- Overall emotional distress assessed with the Hospital Anxiety and Depression scale (HADS).[59-61]
- Health related quality of life measured with the RAND-36 health survey.[60,62-64]
- Goal fulfilment inspired by the Canadian Occupational Performance Measure (COPM).[65] The participants will at baseline be asked to report their work-related goal of full- or part-time work for the coming twelve months and rate their present goal fulfilment and satisfaction on a scale ranging from 0, equalling 'far from reaching my goal'/'not satisfied at all', to 10, equalling 'my goal is fulfilled'/'very satisfied'. At twelve months they will be asked to rate their goal fulfilment and satisfaction again.

#### *Explanatory variables*

The following explanatory variables, consistent with a biopsychosocial perspective, will be collected from SQRP for specialist and primary care, and supplementary questionnaires:

- Self-reported fatigue during the last seven days estimated with the Numeric Fatigue Rating Scale (0-10).[66-68]
- Patient-reported insomnia measured with the Insomnia Severity Index (ISI).[69,70]



- Fear of movement assessed with Fear-avoidance Tampa scale for Kinesiophobia (17 items).[71]
- Physical activity estimated with the National Board of Health and Welfare's three questions on physical activity (0 - >300 minutes/week), exercise (0 - >120 minutes/week), and sedentary behavior (0 - 15 hours).[72]
- Pain related catastrophizing assessed with the Pain Catastrophizing Scale (PCS).[73]
- Perceived work ability measured with the Work Ability Index (WAI) (0-10).[74]
- Job characteristics influencing psychological well-being estimated with the The Swedish Demand-Control-Support Questionnaire (DCSQ).[75]
- Self-reported physical work environment using a questionnaire inspired by the Swedish Work Environment Authority ergonomics checklist.[76,77]
- Perceived life satisfaction (1 - 6) measured with the Life Satisfaction Scale (LiSat).[78,79]
- Self-reported perceived work situation regarding barriers for RTW, strategies to handle barriers and need of support from the employer.
- Self-reported total workload where the participants register number of hours per day for paid work and unpaid household work.[80-82]

#### *Data collected from SWEPPE*

Mobile app usage, for example number of participants using the app, performing daily self-rating, sharing information with the employer, or asking questions to the coach will be retrieved from SWEPPE.

#### **Data collection methods**

1  
2  
3 Data collection for the present trial will start during 2022. Baseline data will be collected  
4 when the IPRP is completed and study ending will be at 12 months follow-up after IPRP.  
5  
6 Data will be collected from SSIA, the SQRP, supplementary questionnaires to the SQRP, and  
7  
8 data registered in SWEPPE (table 1). Data collection for the SQRP is routinely performed  
9  
10 when the IPRP is completed and at 12 months follow-up at both primary and specialized care  
11  
12 units in Sweden providing IPRP. The supplementary questionnaires will be added to these  
13  
14 routine data collections for the SQRP.  
15  
16  
17  
18  
19  
20

### 21 **Data management**

22  
23 Data will be retrieved from SSIA and from the SQRP and connected to individual-level data  
24  
25 retrieved from SWEPPE. The procedure is initiated by sending a file with the participants  
26  
27 social security numbers and a consecutive number key to the SSIA who will fill in the ordered  
28  
29 data for each participant. The SSIA will then send the file to SQRP for addition of registry  
30  
31 data. The principal investigator will receive the file with consecutive numbered data from  
32  
33 SQRP. All data collected in the study will be stored on a safe server at Linköping University.  
34  
35 A data management plan (DMP) will be developed by the principal investigator and co-  
36  
37 workers and will include a description of research data, information about documentation and  
38  
39 quality control of research data, storage and back-up copying of research data, legal and  
40  
41 ethical aspects, accessibility and long-term preservation of research data, and responsibility  
42  
43 and resources related to the research data.  
44  
45  
46  
47  
48  
49  
50

### 51 **Data monitoring**

52  
53 All data in the trial will be monitored regularly. Since no sponsors or competing interests  
54  
55 exists, monitoring of data will be performed independently. To ensure proper handling and  
56  
57  
58  
59  
60

1  
2  
3 storing of data (structure, organization, file naming), the data management plan (DMP) will  
4  
5 be reviewed regularly by the principal investigator and co-workers.  
6  
7  
8  
9

### 10 **Statistical analysis**

11  
12 A statistical analysis plan will be developed with details of statistical analyses, handling of  
13  
14 missing data and any additional analyses, for example subgroup and adjusted analyses.  
15

16  
17 Descriptive statistical analyses will be performed for transparent reporting of participant  
18  
19 characteristics. The clinical effectiveness of SWEPE will be analysed using effect-size and  
20  
21 uni- and multivariate statistical analyses as a preliminary plan. Data from primary and  
22  
23 secondary outcomes will be analysed according to intention-to-treat. Data from SWEPE will  
24  
25 be analysed using repeated measures analyses. All p-values will be presented and a p-value of  
26  
27  $<0.05$  will be considered significant.  
28  
29  
30  
31  
32

### 33 **Harms**

34  
35 SWEPE can be assumed not to create adverse events and is considered a safe intervention.  
36  
37

38  
39 Nevertheless, all participants will be encouraged to report any adverse events or unintended  
40  
41 effects of trial intervention or trial conduct such as unexpected side effects or deterioration of  
42  
43 symptoms.[83]  
44  
45  
46  
47

### 48 **Auditing**

49  
50 To facilitate adherence to the study protocol [84], the project coordinator (CT) will have  
51  
52 regular contact (every second week) with the unit coordinators during the study period.  
53

54  
55 Processes to be reviewed are participant screening and eligibility. Documentation of the  
56  
57 recruitment and randomization/allocation process, for example eligible patients asked to  
58  
59  
60

1  
2  
3 participate, the number of patients included, excluded or declining participation, performed by  
4  
5 CT will be reviewed by the researchers (GL, MB).  
6  
7  
8  
9

## 10 **ETHICS AND DISSEMINATION**

11  
12 The study is approved by the Swedish Ethics Review Board (Dnr 2020-01593, Dnr 2021-  
13 01854) and the trial is registered in ClinicalTrials.gov (NCT05058547). Any important  
14  
15 modifications of the study protocol will be communicated to the Swedish Ethics Review  
16  
17 Board and to the participants. Informed consent (S3) will be collected from all participants by  
18  
19 one of the researchers (CT). The consent form is design based on the Ethics committee  
20  
21 recommendation and includes written information about the study.  
22  
23  
24  
25

26 Confidentiality will be protected by coding of individual participants' collected data. Data will  
27  
28 be stored at a password protected project server at Linköping University and will not be  
29  
30 accessed by unauthorized persons. The study results will be submitted to peer-review journals  
31  
32 for publication and will be presented in national and international research networks, clinical  
33  
34 settings, and patient associations. The study protocol is available via Clinicaltrial.gov  
35  
36 (NCT05058547). There is no present plan regarding public access of participant-level data set  
37  
38 or statistical code.  
39  
40  
41  
42  
43  
44

## 45 **AUTHOR CONTRIBUTION**

46  
47 MB and GL formed the original research concept. CT, MB and GL contributed to the study  
48  
49 design and CT will coordinate the project in cooperation with MB and GL. CT, ML and LV  
50  
51 will be responsible for the unit coordinators at each participating unit and the inclusion of  
52  
53 participants. All authors will collect and manage data during the trial. CT, MB and GL have  
54  
55 written and revised this protocol with critical input from ML and LV. All authors have  
56  
57 contributed important intellectual content to the manuscript.  
58  
59  
60

**FUNDING**

This study was supported by the Swedish Research Council for Health, Working Life and Welfare (Dnr 2019-01264).

**COMPETING INTERESTS STATEMENT**

The authors have no competing interests to declare.

## REFERENCES

1. Harker J, Reid KJ, Bekkering GE, et al. Epidemiology of chronic pain in denmark and sweden. *Pain Res Treat* 2012;2012:371248.
2. Reid KJ, Harker J, Bala MM, et al. Epidemiology of chronic non-cancer pain in Europe: narrative review of prevalence, pain treatments and pain impact. *Curr Med Res Opin* 2011;27(2):449-62.
3. Dahlhamer J, Lucas J, Zelaya C, et al. Prevalence of Chronic Pain and High-Impact Chronic Pain Among Adults - United States, 2016. *MMWR Morb Mortal Wkly Rep* 2018;67(36):1001-6.
4. Perez C, Margarit C, Sanchez-Magro I, et al. Chronic pain features relate to quality of life more than physiopathology: A cross-sectional evaluation in pain clinics. *Pain Pract* 2017;17(7):866-78.
5. Gerdle B, Bjork J, Henriksson C, et al. Prevalence of current and chronic pain and their influences upon work and healthcare-seeking: a population study. *J Rheumatol* 2004;31(7):1399-406.
6. Caceres-Matos R, Gil-Garcia E, Barrientos-Trigo S, et al. Consequences of chronic non-cancer pain in adulthood. Scoping review. *Rev Saude Publica* 2020;54:39.
7. Asmundson GJ, Katz J. Understanding the co-occurrence of anxiety disorders and chronic pain: state-of-the-art. *Depress Anxiety* 2009;26(10):888-901.
8. Shupler MS, Kramer JK, Cragg JJ, et al. Pan-Canadian Estimates of Chronic Pain Prevalence From 2000 to 2014: A Repeated Cross-Sectional Survey Analysis. *J Pain* 2019;20(5):557-65.
9. Kamper SJ, Apeldoorn AT, Chiarotto A, et al. Multidisciplinary biopsychosocial rehabilitation for chronic low back pain: Cochrane systematic review and meta-analysis. *BMJ* 2015;350:h444.
10. Waterschoot FPC, Dijkstra PU, Geertzen JHB, et al. Dose or content? Effectiveness of pain rehabilitation programs for patients with chronic low back pain: A systematic review. Author reply. *Pain* 2014;155(9):1902-3.
11. Scascighini L, Toma V, Dober-Spielmann S, et al. Multidisciplinary treatment for chronic pain: a systematic review of interventions and outcomes. *Rheumatology (Oxford)* 2008;47(5):670-8.
12. Svanholm F, Liedberg GM, Lofgren M, et al. Factors of importance for return to work, experienced by patients with chronic pain that have completed a multimodal rehabilitation program - a focus group study. *Disabil Rehabil* 2020:1-9.
13. Toye F, Seers K, Allcock N, et al. A synthesis of qualitative research exploring the barriers to staying in work with chronic musculoskeletal pain. *Disabil Rehabil* 2016;38(6):566-72.
14. Liedberg G, Björk M, Dragioti E, et al. Qualitative evidence from studies of interventions aimed at return to work and staying at work for persons with chronic musculoskeletal pain. *J Clin Med* 10, 1247 2021;10(1247).
15. Wilkie R, Bjork M, Costa-Black KM, et al. Managing work participation for people with rheumatic and musculoskeletal diseases. *Best Pract Res Clin Rheumatol* 2020;34(2):101517.
16. Glavare M, Lofgren M, Schult ML. Between unemployment and employment: experience of unemployed long-term pain sufferers. *Work* 2012;43(4):475-85.

17. Saunders SL, Nedelec B. What work means to people with work disability: a scoping review. *J Occup Rehabil* 2014;24(1):100-10.
18. Grant M, O-Beirne-Elliman J, Froud R, et al. The work of return to work. Challenges of returning to work when you have chronic pain: a meta-ethnography. *BMJ Open* [Internet]. 2019; 9.
19. Magalhães L, Chan C, Chapman A, et al. Successful return to work of individuals with chronic pain according to health care providers: a meta-synthesis. *Cadernos Brasileiros de Terapia Ocupacional/Brazilian Journal of Occupational Therapy* 2017;25(4):825-37.
20. Cohen D, Allen J, Rhydderch M, et al. The return to work discussion: a qualitative study of the line manager conversation about return to work and the development of an educational programme. *J Rehabil Med* 2012;44(8):677-83.
21. Scott W, Chilcot J, Guildford B, et al. Feasibility randomized-controlled trial of online Acceptance and Commitment Therapy for patients with complex chronic pain in the United Kingdom. *Eur J Pain* 2018;22(8):1473-84.
22. Coutu M, Legare F, Durand MJ, et al. Acceptability and feasibility of a shared decision-making model in work rehabilitation: A mixed-methods study of stakeholders' perspectives. *J Occup Rehabil* 2019;29(1):128-39.
23. Turesson C, Liedberg G, Bjork M. Development of an evidence-based digital support for sustainable return to work for persons with chronic pain and their employers: a user-centered agile design approach. *JMIR Human Factors*; 2022, 9(1): e33571. doi: 10.2196/33571
24. Brhel M, Meth H, Maedche A, et al. Exploring principles of user-centered agile software development: A literature review. *Inform Software Tech* 2015;61:163-81.
25. Braillard O, Cedraschi C, Jesaimani A, et al. Chronic noncancer pain and patient education: a place for e-learning? *Rev Med Suisse* 2015;11(480):1400, 2-5.
26. Solem IKL, Varsi C, Eide H, et al. A user-centered approach to an evidence-based electronic health pain management intervention for people with chronic pain: design and development of EPIO. *JMIR* 2020;22(1).
27. Kristjansdottir OB, Fors EA, Eide E, et al. A smartphone-based intervention with diaries and therapist feedback to reduce catastrophizing and increase functioning in women with chronic widespread pain. part 2: 11-month follow-up results of a randomized trial. *JMIR* 2013;15(3):e72.
28. Thurnheer SE, Gravestock I, Pichierri G, et al. Benefits of mobile apps in pain management: systematic review. *JMIR Mhealth Uhealth* 2018;6(10):e11231.
29. Garg S, Garg D, Turin TC, et al. Web-based interventions for chronic back pain: a systematic review. *JMIR* 2016;18(7):e139.
30. Slattery BW, Haugh S, O'Connor L, et al. An evaluation of the effectiveness of the modalities used to deliver electronic health interventions for chronic pain: systematic review with network meta-analysis. *JMIR* 2019;21(7).
31. Solem IKL, Varsi C, Eide H, et al. Patients' needs and requirements for eHealth pain management interventions: qualitative study. *JMIR* 2019;21(4).
32. Timmers T, Janssen L, Kool RB, et al. Educating patients by providing timely information using smartphone and tablet apps: systematic review. *JMIR* 2020;22(4):e17342.
33. Granja C, Janssen W, Johansen MA. Factors determining the success and failure of eHealth interventions: systematic review of the literature. *JMIR* 2018;20(5):e10235.



- 1
- 2
- 3
- 4 34. Devan H, Hale L, Hempel D, et al. What works and does not work in a self-
- 5 management intervention for people with chronic pain? Qualitative systematic review and
- 6 meta-synthesis. *Phys Ther* 2018;98(5):381-97.
- 7 35. Devan H, Farmery D, Peebles L, et al. Evaluation of self-management support
- 8 functions in apps for people with persistent pain: systematic review. *JMIR Mhealth Uhealth*
- 9 2019;7(2):e13080.
- 10 36. Ruckenstein M. Visualized and interacted life: personal analytics and
- 11 engagement with data doubles. *Societies* 2014;4:68-84.
- 12 37. Mamykina L, Smaldone AM, Bakken SR. Adopting the sensemaking perspective
- 13 for chronic disease self-management. *J Biomed Inform* 2015;56:406-17.
- 14 38. Morton K, Dennison L, May C, et al. Using digital interventions for self-
- 15 management of chronic physical health conditions: A meta-ethnography review of published
- 16 studies. *Patient Educ Couns* 2017;100(4):616-35.
- 17 39. Machado GC, Pinheiro MB, Lee H, et al. Smartphone apps for the self-
- 18 management of low back pain: A systematic review. *Best Pract Res Clin Rheumatol*
- 19 2016;30(6):1098-109.
- 20 40. Coe-O'Brien R, Joseph L, Kuisma R, et al. Outcome measures used in the
- 21 smartphone applications for the management of low back pain: a systematic scoping review.
- 22 *Health Inf Sci Syst* 2020;8(1):5.
- 23 41. Chan AW, Tetzlaff JM, Altman DG, et al. SPIRIT 2013 statement: defining
- 24 standard protocol items for clinical trials. *Ann Intern Med* 2013;158(3):200-7.
- 25 42. Schulz KF, Altman DG, Moher D, et al. CONSORT 2010 statement: updated
- 26 guidelines for reporting parallel group randomised trials. *Int J Surg* 2011;9(8):672-7.
- 27 43. Campbell MK, Piaggio G, Elbourne DR, et al. Consort 2010 statement: extension
- 28 to cluster randomised trials. *BMJ* 2012;345:e5661.
- 29 44. WHO. WHO Trial Registration Data Set (Version 1.3.1): World Health
- 30 Organization; 2021 [Available from: [https://www.who.int/clinical-trials-registry-](https://www.who.int/clinical-trials-registry-platform/network/who-data-set)
- 31 [platform/network/who-data-set](https://www.who.int/clinical-trials-registry-platform/network/who-data-set)].
- 32 45. LoMartire R, Dahlstrom O, Bjork M, et al. Predictors of Sickness Absence in a
- 33 Clinical Population With Chronic Pain. *J Pain* 2021;22(10):1180-94.
- 34 46. Altman DG, Bland JM. How to randomise. *BMJ* 1999;319(7211):703-4.
- 35 47. Kim J, Shin W. How to do random allocation (randomization). *Clin Orthop Surg*
- 36 2014;6(1):103-9.
- 37 48. Sedgwick P. Treatment allocation in trials: block randomisation. *BMJ*
- 38 2014;348:g2409.
- 39 49. Sennehed CP, Stigmar K, Grahn B, et al. Evaluation of a multimodal pain
- 40 rehabilitation programme in primary care based on clinical register data: a feasibility study.
- 41 *Prim Health Care Res Dev* 2020;21:e2.
- 42 50. Rivano Fischer M, Persson EB, Stalnacke BM, et al. Return to work after
- 43 interdisciplinary pain rehabilitation: One- and two-year follow-up based on the Swedish
- 44 Quality Registry for Pain rehabilitation. *J Rehabil Med* 2019;51(4):281-9.
- 45 51. IASP. IASP Terminology [Available from: [https://www.iasp-](https://www.iasp-pain.org/terminology?navItemNumber=576#Pain)
- 46 [pain.org/terminology?navItemNumber=576#Pain](https://www.iasp-pain.org/terminology?navItemNumber=576#Pain) [200818].
- 47 52. Ballantyne JC, Sullivan MD. Intensity of Chronic Pain--The Wrong Metric? *N*
- 48 *Engl J Med* 2015;373(22):2098-9.
- 49
- 50
- 51
- 52
- 53
- 54
- 55
- 56
- 57
- 58
- 59
- 60



- 1
- 2
- 3
- 4 53. Turk DC, Dworkin RH, Revicki D, et al. Identifying important outcome domains
- 5 for chronic pain clinical trials: an IMMPACT survey of people with pain. *Pain*
- 6 2008;137(2):276-85.
- 7 54. Patel KV, Amtmann D, Jensen MP, et al. Clinical outcome assessment in clinical
- 8 trials of chronic pain treatments. *Pain Rep* 2021;6(1):e784.
- 9 55. Försäkringskassan. Förslag på utfallsmått för att mäta återgång i arbete efter
- 10 sjukskrivning. Försäkringskassan Analys och prognos; 2016.
- 11 56. Williamson A, Hoggart B. Pain: a review of three commonly used pain rating
- 12 scales. *J Clin Nurs* 2005;14(7):798-804.
- 13 57. Bergstrom G, Jensen IB, Bodin L, et al. Reliability and factor structure of the
- 14 Multidimensional Pain Inventory Swedish Language Version (MPI-S). *Pain* 1998;75(1):101-10.
- 15 58. Kerns RD, Turk DC, Rudy TE. The West Haven-Yale Multidimensional Pain
- 16 Inventory (WHYMPI). *Pain* 1985;23(4):345-56.
- 17 59. Bjelland I, Dahl AA, Haug TT, et al. The validity of the Hospital Anxiety and
- 18 Depression Scale. An updated literature review. *J Psychosom Res* 2002;52(2):69-77.
- 19 60. LoMartire R, Äng BO, Gerdle B, et al. Psychometric properties of Short Form-36
- 20 Health Survey, EuroQol 5-dimensions, and Hospital Anxiety and Depression Scale in patients
- 21 with chronic pain. *Pain* 2020;161(1):83-95.
- 22 61. Snaith RP. The Hospital Anxiety And Depression Scale. *Health Qual Life*
- 23 *Outcomes* 2003;1:29.
- 24 62. Vetter TR. A Primer on Health-Related Quality of Life in Chronic Pain Medicine.
- 25 *Anesthesia & Analgesia* 2007;104(3).
- 26 63. Orwelius L, Nilsson M, Nilsson E, et al. The Swedish RAND-36 Health Survey -
- 27 reliability and responsiveness assessed in patient populations using Svensson's method for
- 28 paired ordinal data. *J Patient Rep Outcomes* 2017;2(1):4.
- 29 64. Vetter TR. A primer on health-related quality of life in chronic pain medicine.
- 30 *Anesth Analg* 2007;104(3):703-18.
- 31 65. Wressle E, Lindstrand J, Neher M, et al. The Canadian occupational
- 32 performance measure as an outcome measure and team tool in a day treatment
- 33 programme. *Disabil Rehabil* 2003;25(10):497-506.
- 34 66. Aaronson L, Teel C, Cassmeyer V, et al. Defining and measuring fatigue. *J Nurs*
- 35 *Scholarsh* 1999;31(1):45-50.
- 36 67. Chuang LL, Lin KC, Hsu AL, et al. Reliability and validity of a vertical numerical
- 37 rating scale supplemented with a faces rating scale in measuring fatigue after stroke. *Health*
- 38 *Qual Life Outcomes* 2015;13:91.
- 39 68. Dailey DL, Frey Law LA, Vance CG, et al. Perceived function and physical
- 40 performance are associated with pain and fatigue in women with fibromyalgia. *Arthritis Res*
- 41 *Ther* 2016;18:68.
- 42 69. Akerstedt T, Anund A, Axelsson J, et al. Subjective sleepiness is a sensitive
- 43 indicator of insufficient sleep and impaired waking function. *J Sleep Res* 2014;23(3):240-52.
- 44 70. Morin CM. Measuring outcomes in randomized clinical trials of insomnia
- 45 treatments. *Sleep Med Rev* 2003;7(3):263-79.
- 46 71. Boersma K, Linton S, Overmeer T, et al. Lowering fear-avoidance and enhancing
- 47 function through exposure in vivo. A multiple baseline study across six patients with back
- 48 pain. *Pain* 2004;108(1-2):8-16.
- 49 72. Agerberg M. Ställ rätt fråga om fysisk aktivitet. *Läkartidningen*
- 50 2014;48(111):C9AY.
- 51
- 52
- 53
- 54
- 55
- 56
- 57
- 58
- 59
- 60

- 1  
2  
3 73. Sullivan M, Bishop L, Scott R, et al. The Pain Catastrophizing Scale:  
4 Development and validation. *Psychological Assessment* 1995;7(4):524-32.  
5  
6 74. Lundin A, Leijon O, Vaez M, et al. Predictive validity of the Work Ability Index  
7 and its individual items in the general population. *Scand J Public Health* 2017;45(4):350-6.  
8  
9 75. Sanne B, Torp S, Mykletun A, et al. The Swedish Demand-Control-Support  
10 Questionnaire (DCSQ): factor structure, item analyses, and internal consistency in a large  
11 population. *Scand J Public Health* 2005;33(3):166-74.  
12  
13 76. Arbetsmiljöverket. Belastningsergonomi. Arbetsmiljöverkets föreskrifter och  
14 allmänna råd om belastningsergonomi. AFS 2012:2.  
15  
16 77. Arbetsmiljöverket. Checklista för bedömning - utifrån föreskrifterna om  
17 belastningsergonomi, AFS 2012:2. Stockholm: Arbetsmiljöverket; 2013.  
18  
19 78. Stålnacke B-M. Life satisfaction in patients with chronic pain—relation to pain  
20 intensity, disability, and psychological factors. *Neuropsychiatric Disease and Treatment*  
21 2011;7:683.  
22  
23 79. Fugl-Meyer A, Bränholm I, Fugl-Meyer K. Happiness and domain-specific life  
24 satisfaction in adult northern Swedes. *Clin Rehabil* 1991;5(1):25-33.  
25  
26 80. Krantz G, Berntsson L, Lundberg U. Total workload, work stress and perceived  
27 symptoms in Swedish male and female white-collar employees. *Eur J Public Health*  
28 2005;15(2):209-14.  
29  
30 81. Kahn R. The forms of women's work. In: Frankenhaeuser M, Lundberg U,  
31 Chesney M, editors. Women, work and health. Stress and opportunities. New York Plenum  
32 Press; 1991. p. 65-83.  
33  
34 82. Mårdberg B, Lundberg U, Frankenhaeuser M. The total workload of parents  
35 employed in white-collar jobs: construction of a questionnaire and a scoring system. *Scand J*  
36 *of Psychology* 1991;32:233-9.  
37  
38 83. Palermo TM, Slack K, Loren D, et al. Measuring and reporting adverse events in  
39 clinical trials of psychological treatments for chronic pain. *Pain* 2020;161(4):713-7.  
40  
41 84. Chan AW, Tetzlaff JM, Gotzsche PC, et al. SPIRIT 2013 explanation and  
42 elaboration: guidance for protocols of clinical trials. *BMJ* 2013;346:e7586.  
43  
44  
45  
46  
47  
48  
49  
50  
51  
52  
53  
54  
55  
56  
57  
58  
59  
60

1  
2  
3  
4  
5  
6 **Figure legends**  
7

8 Figure 1. Time schedule of enrollment, interventions, and assessments.  
9  
10  
11  
12  
13  
14  
15  
16  
17  
18  
19  
20  
21  
22  
23  
24  
25  
26  
27  
28  
29  
30  
31  
32  
33  
34  
35  
36  
37  
38  
39  
40  
41  
42  
43  
44  
45  
46  
47  
48  
49  
50  
51  
52  
53  
54  
55  
56  
57  
58  
59  
60

For peer review only

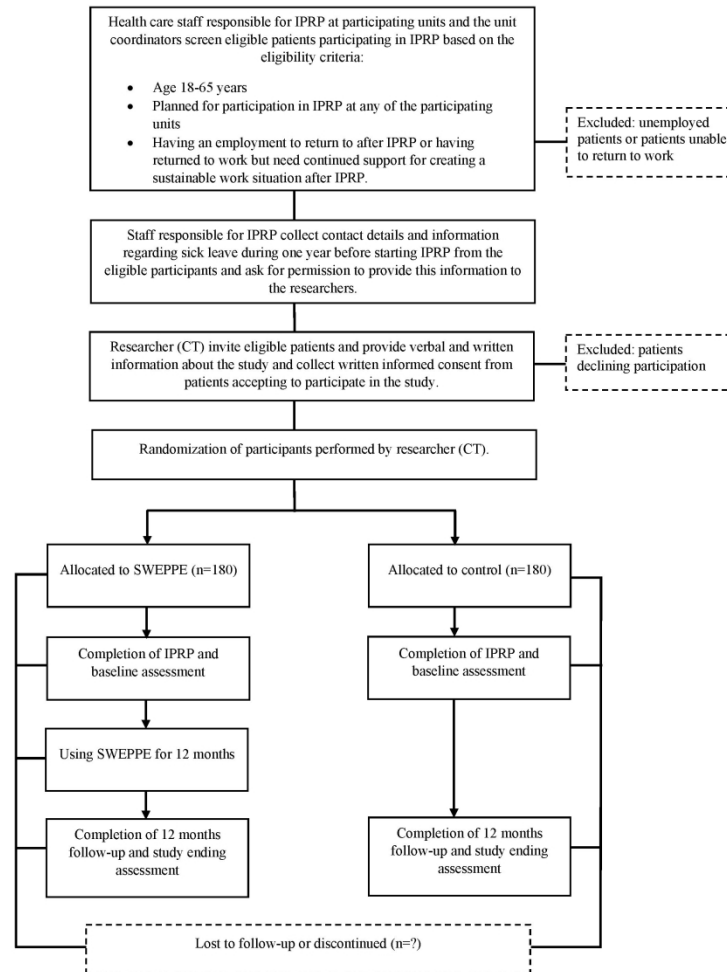

Figure 1. Time schedule of enrolment, interventions, and assessments.

210x297mm (300 x 300 DPI)

## S1. Overview of the study based on the SPIRIT 2013 checklist.

| Section                    | SPIRIT item number | Item description                                                         | Study description                                                                                                                                                                                                                                                                                                                                                                                                                                                                                                                                                                                                                                                                                              | Page number where item can be found. |
|----------------------------|--------------------|--------------------------------------------------------------------------|----------------------------------------------------------------------------------------------------------------------------------------------------------------------------------------------------------------------------------------------------------------------------------------------------------------------------------------------------------------------------------------------------------------------------------------------------------------------------------------------------------------------------------------------------------------------------------------------------------------------------------------------------------------------------------------------------------------|--------------------------------------|
| Title                      | 1                  | Title                                                                    | An evidence-based digital support during one year after an Interdisciplinary Pain Rehabilitation Program for persons with chronic musculoskeletal pain to facilitate a sustainable return to work: study protocol for a registry-based multicentre randomized controlled trial.                                                                                                                                                                                                                                                                                                                                                                                                                                | Page 1, manuscript file              |
| Trial registration         | 2a                 | Trial identifier and registry name                                       | ClinicalTrials.gov registration number NCT05058547                                                                                                                                                                                                                                                                                                                                                                                                                                                                                                                                                                                                                                                             | Page 4, manuscript file              |
|                            | 2b                 | All items from the World Health Organization trial registration data set | Supplementary table S2.                                                                                                                                                                                                                                                                                                                                                                                                                                                                                                                                                                                                                                                                                        | Supplementary file S2                |
| Protocol version           | 3                  | Date and version identifier                                              | Version 1. 27 September 2021. NCT05058547                                                                                                                                                                                                                                                                                                                                                                                                                                                                                                                                                                                                                                                                      | Page 4, manuscript file              |
| Funding                    | 4                  | Sources and types                                                        | The Swedish Research Council for Health, Working Life and Welfare: Dnr 2019-01264. Financial.                                                                                                                                                                                                                                                                                                                                                                                                                                                                                                                                                                                                                  | Page 19, manuscript file             |
| Roles and responsibilities | 5a                 | Names, affiliations, and roles of protocol contributors                  | Christina Turesson <sup>1</sup> , Gunilla Liedberg <sup>1</sup> , Linda Vixner <sup>2</sup> , Monica Löfgren <sup>3</sup> , Mathilda Björk <sup>4</sup> . MB and GL formed the original research concept. CT, MB and GL contributed to the study design and CT will coordinate the project in cooperation with MB and GL. CT, ML and LV will be responsible for the unit coordinators at each participating unit and the inclusion of participants. All authors will collect and manage data during the trial. CT, MB and GL have written and revised this protocol with critical input from ML and LV. All authors have contributed important intellectual content to the manuscript.<br><b>Affiliations:</b> | Page 1 and 19, manuscript file       |

1  
2  
3  
4  
5  
6  
7  
8  
9  
10  
11  
12  
13  
14  
15  
16  
17  
18  
19  
20  
21  
22  
23  
24  
25  
26  
27  
28  
29  
30  
31  
32  
33  
34  
35  
36  
37  
38  
39  
40  
41  
42  
43  
44  
45  
46

|  |    |                                                                                                                                                                                                                                                                                          |                                                                                                                                                                                                                                                                                                                                                                                                                                                                                                                                     |                         |
|--|----|------------------------------------------------------------------------------------------------------------------------------------------------------------------------------------------------------------------------------------------------------------------------------------------|-------------------------------------------------------------------------------------------------------------------------------------------------------------------------------------------------------------------------------------------------------------------------------------------------------------------------------------------------------------------------------------------------------------------------------------------------------------------------------------------------------------------------------------|-------------------------|
|  |    |                                                                                                                                                                                                                                                                                          | <p>1. Division of Prevention, Rehabilitation and Community Medicine, Department of Health, Medicine and Caring Sciences, Linköping University, Linköping, Sweden</p> <p>2. School of Health and Welfare, Dalarna University, Falun, Sweden</p> <p>3. Karolinska Institutet, Department of Clinical Sciences and Department of Rehabilitation Medicine Danderyd Hospital, 182 88 Stockholm</p> <p>4. Pain and Rehabilitation Centre, Department of Health, Medicine and Caring Sciences, Linköping University, Linköping, Sweden</p> |                         |
|  | 5b | Name and contact information for the trial sponsor                                                                                                                                                                                                                                       | <p>Linköping University<br/>581 83 Linköping<br/>Sweden<br/>+46 28 10 00</p>                                                                                                                                                                                                                                                                                                                                                                                                                                                        | Page 1, manuscript file |
|  | 5c | Role of study sponsor and funders, if any, in study design; collection, management, analysis, and interpretation of data; writing of the report; and the decision to submit the report for publication, including whether they will have ultimate authority over any of these activities | N/A                                                                                                                                                                                                                                                                                                                                                                                                                                                                                                                                 |                         |
|  | 5d | Composition, roles, and responsibilities of the coordinating center, steering                                                                                                                                                                                                            | N/A                                                                                                                                                                                                                                                                                                                                                                                                                                                                                                                                 |                         |

|                                                 |    |                                                                                                                                                                                                    |                                                                                                                                                                                                                                                                                                                                                                                                                                                                                                                                                                                                                                                                                                                                                                                                                                                                                                                                                                                                                                                                                                                                                                                                                                                                                                                                                                                                                                                                                                                                                                                                                                                                                                                                               |                           |
|-------------------------------------------------|----|----------------------------------------------------------------------------------------------------------------------------------------------------------------------------------------------------|-----------------------------------------------------------------------------------------------------------------------------------------------------------------------------------------------------------------------------------------------------------------------------------------------------------------------------------------------------------------------------------------------------------------------------------------------------------------------------------------------------------------------------------------------------------------------------------------------------------------------------------------------------------------------------------------------------------------------------------------------------------------------------------------------------------------------------------------------------------------------------------------------------------------------------------------------------------------------------------------------------------------------------------------------------------------------------------------------------------------------------------------------------------------------------------------------------------------------------------------------------------------------------------------------------------------------------------------------------------------------------------------------------------------------------------------------------------------------------------------------------------------------------------------------------------------------------------------------------------------------------------------------------------------------------------------------------------------------------------------------|---------------------------|
|                                                 |    | committee, end point adjudication committee, data management team, and other individuals or groups overseeing the trial, if applicable (see item 21a for DMC)                                      |                                                                                                                                                                                                                                                                                                                                                                                                                                                                                                                                                                                                                                                                                                                                                                                                                                                                                                                                                                                                                                                                                                                                                                                                                                                                                                                                                                                                                                                                                                                                                                                                                                                                                                                                               |                           |
| <b>Introduction</b><br>Background and rationale | 6a | Description of research question and justification for undertaking the trial, including summary of relevant studies (published and unpublished) examining benefits and harms for each intervention | Chronic musculoskeletal pain (CMSP) severely affects the individual's quality of life, functioning and ability to work, and comes with significant societal costs for sick leave and loss of productivity. After completing an Interdisciplinary Pain Rehabilitation Program (IPRP), patients with CMSP experience a gap in the return to work (RTW) process when the responsibility for RTW is taken over by the employer. The employers have a crucial role in a successful RTW process but may lack knowledge regarding the condition and how to support the employee with CMSP in the best way during RTW. Barriers for RTW for persons with CMSP are for example lack of support at the workplace, not finding the right fit between the employee's physical abilities and work tasks, or problems with relationships with supervisors or coworkers. Key factors for a successful RTW are communication and collaboration between the employer and the employee. To facilitate the important interaction between employer and employee a shared smartphone application may be a tool for increasing a successful outcome in the RTW process. Smart phone applications as digital support has shown promising results for persons with chronic pain and can be helpful especially in an out-clinic setting. They are easily accessed, can enable management of the condition, and reduce pain interference. Focusing on self-management and empowerment are important parts of successful digital support. Self-monitoring can contribute to learning about consequences of actions and behaviours in daily life. Understanding and using own self-monitoring data for making changes in daily activities can give a sense of control and | Page 5-6, manuscript file |

|                              |    |                                                                                                                                                                                      |                                                                                                                                                                                                                                                                                                                                                                                                                                                                                                                                                                                |                         |
|------------------------------|----|--------------------------------------------------------------------------------------------------------------------------------------------------------------------------------------|--------------------------------------------------------------------------------------------------------------------------------------------------------------------------------------------------------------------------------------------------------------------------------------------------------------------------------------------------------------------------------------------------------------------------------------------------------------------------------------------------------------------------------------------------------------------------------|-------------------------|
|                              |    |                                                                                                                                                                                      | motivation for continued use of self-management strategies. Although positive effects of digital support have been shown there are limitations related to low overall quality of smartphone apps for CMSP and lack of rigorous assessment of their effectiveness.                                                                                                                                                                                                                                                                                                              |                         |
| Objectives                   | 7  | Specific objectives or hypotheses                                                                                                                                                    | The aim is to evaluate the clinical effectiveness of a digital support (SWEPE) for promoting a sustainable RTW for persons with CMSP and to facilitate the employers' supportive role and responsibilities in the process. The hypothesis is that using SWEPE will decrease the need for sick leave.                                                                                                                                                                                                                                                                           | Page 7, manuscript file |
| Trial design                 | 8  | Description of trial design, including type of trial                                                                                                                                 | Registry-based randomized controlled trial with parallel groups.                                                                                                                                                                                                                                                                                                                                                                                                                                                                                                               | Page 7, manuscript file |
| <b>Methods</b> Study setting | 9  | Description of study settings (e.g., community clinic, academic hospital) and list of countries where data will be collected. Reference to where list of study sites can be obtained | Specialist and primary care level health care in Sweden reporting to the Swedish National Quality Registry for Pain Rehabilitation (SQR). Study sites are listed in the protocol (ClinicalTrials.gov registration number NCT05058547)                                                                                                                                                                                                                                                                                                                                          | Page 7, manuscript file |
| Eligibility criteria         | 10 | Inclusion and exclusion criteria for participants.                                                                                                                                   | <p>Inclusion Criteria:</p> <p>Patients entering the trial must have completed an Interdisciplinary Pain Rehabilitation Program (IPRP). The principal inclusion criteria for IPRP in Sweden are:</p> <ul style="list-style-type: none"> <li>• persistent or intermittent pain lasting <math>\geq 3</math> months</li> <li>• pain affecting daily activities to a large extent,</li> <li>• completed systematic assessment and non-pharmacological optimization is completed,</li> <li>• screening for psychosocial risk factors and differential diagnosis completed</li> </ul> | Page 8, manuscript file |



|               |     |                                                                                                                                                                                                  |                                                                                                                                                                                                                                                                                                                                                                                                                                                                                                                                 |                            |
|---------------|-----|--------------------------------------------------------------------------------------------------------------------------------------------------------------------------------------------------|---------------------------------------------------------------------------------------------------------------------------------------------------------------------------------------------------------------------------------------------------------------------------------------------------------------------------------------------------------------------------------------------------------------------------------------------------------------------------------------------------------------------------------|----------------------------|
|               |     |                                                                                                                                                                                                  | <p>In addition, the following criteria will be applied:</p> <ul style="list-style-type: none"> <li>• Age 18-65 years</li> <li>• Completed participation in IPRP at any of the participating units.</li> <li>• Having an employment to return to after IPRP or having returned to work but need continued support for creating a sustainable work situation after IPRP.</li> </ul> <p>Exclusion criteria:</p> <ul style="list-style-type: none"> <li>• Completed IPRP but are unemployed or unable to return to work.</li> </ul> |                            |
| Interventions | 11a | Interventions for each group with sufficient detail to allow replication, including how and when they will be administered                                                                       | <p>SWEPPE, a smartphone application where the individual can create an action plan, perform daily registrations of health aspects, self-monitoring of health aspects and goals, have access to a library with evidence-based facts and a coach, and possibility to share information with the employer. The participants will use SWEPPE for 12 months.</p> <p>Participants randomized to the control group will not receive any active intervention for RTW after IPRP.</p>                                                    | Page 9-10, manuscript file |
|               | 11b | Criteria for discontinuing or modifying allocated interventions for a given trial participant (e.g., drug dose change in response to harms, participant request, or improving/worsening disease) | N/A                                                                                                                                                                                                                                                                                                                                                                                                                                                                                                                             |                            |
|               | 11c | Strategies to improve adherence to intervention                                                                                                                                                  | N/A                                                                                                                                                                                                                                                                                                                                                                                                                                                                                                                             |                            |

1  
2  
3  
4  
5  
6  
7  
8  
9  
10  
11  
12  
13  
14  
15  
16  
17  
18  
19  
20  
21  
22  
23  
24  
25  
26  
27  
28  
29  
30  
31  
32  
33  
34  
35  
36  
37  
38  
39  
40  
41  
42  
43  
44  
45  
46

|                      |     |                                                                                                                                                                                                                                                                                                                                                                                      |                                                                                                                                                                                                                                                                                                                                                                                                                                                                                                                                                                                                                                              |                             |
|----------------------|-----|--------------------------------------------------------------------------------------------------------------------------------------------------------------------------------------------------------------------------------------------------------------------------------------------------------------------------------------------------------------------------------------|----------------------------------------------------------------------------------------------------------------------------------------------------------------------------------------------------------------------------------------------------------------------------------------------------------------------------------------------------------------------------------------------------------------------------------------------------------------------------------------------------------------------------------------------------------------------------------------------------------------------------------------------|-----------------------------|
|                      |     | protocols, and any procedures for monitoring adherence (e.g., drug tablet return, laboratory tests)                                                                                                                                                                                                                                                                                  |                                                                                                                                                                                                                                                                                                                                                                                                                                                                                                                                                                                                                                              |                             |
|                      | 11d | Relevant concomitant care and interventions that are permitted or prohibited during the trial                                                                                                                                                                                                                                                                                        | The participants can initiate and seek other types of health care or support during their RTW process based on their needs.                                                                                                                                                                                                                                                                                                                                                                                                                                                                                                                  | Page 10, manuscript file    |
| Outcomes             | 12  | Primary, secondary, and other outcomes, including the specific measurement variable (e.g., systolic blood pressure), analysis metric (e.g., change from baseline, final value, time to event), method of aggregation (e.g., median, proportion), and time point for each outcome. Explanation of the clinical relevance of chosen efficacy and harm outcomes is strongly recommended | Outcome assessments in the present trial are intended to capture the complexity of pain based on the biopsychosocial model namely medical, psychological, and social (total life situation) factors impacting on the work situation. It has been recommended to include multiple outcomes in clinical trials for persons with CMSP to capture important domains affected by symptoms such as functioning and health-related quality of life. The primary and secondary outcomes are collected for evaluation of the clinical effectiveness of SWEPE, and the complementary variables will be collected based on their effect on the outcome. | Page 12-16, manuscript file |
| Participant timeline | 13  | Time schedule of enrollment,                                                                                                                                                                                                                                                                                                                                                         | Figure 1.                                                                                                                                                                                                                                                                                                                                                                                                                                                                                                                                                                                                                                    | Page 7, figure 1            |

|                                                               |     |                                                                                                                                                                                       |                                                                                                                                                                                                                                                                                                                                                                                                                                                                                                                                                                                                                                                                                                                                                                                                                                                                                                                                                |                           |
|---------------------------------------------------------------|-----|---------------------------------------------------------------------------------------------------------------------------------------------------------------------------------------|------------------------------------------------------------------------------------------------------------------------------------------------------------------------------------------------------------------------------------------------------------------------------------------------------------------------------------------------------------------------------------------------------------------------------------------------------------------------------------------------------------------------------------------------------------------------------------------------------------------------------------------------------------------------------------------------------------------------------------------------------------------------------------------------------------------------------------------------------------------------------------------------------------------------------------------------|---------------------------|
|                                                               |     | interventions (including any runins and washouts), assessments, and visits for participants. A schematic diagram is highly recommended (Figure).                                      |                                                                                                                                                                                                                                                                                                                                                                                                                                                                                                                                                                                                                                                                                                                                                                                                                                                                                                                                                |                           |
| Sample size                                                   | 14  | Estimated number of participants needed to achieve study objectives and how it was determined, including clinical and statistical assumptions supporting any sample size calculations | Since there is no established minimal clinical important difference regarding sick leave, the sample size calculation was inspired by previous research regarding patterns of sick leave after IPRP [45,46]. It has been shown that the distribution of sick leave change over time from full-time to partial sick leave after IPRP [45] and sick leave are reduced with approximately 16 net days from one year before to two years after IPRP. [46] Therefore, an estimated difference between the groups of 20 net days with a standard deviation of 60 and an effect-size of 0.333 was set for rejection of the null hypothesis. To detect this difference with a power of 80% and a significance level of 0.05 a total sample size of 300 participants (150/group) are needed. With an allowance for 20% of participants lost to follow-up we aim to recruit a total sample size of 360 participants (n=180 intervention, n=180 control). | Page 11, manuscript file  |
| Recruitment                                                   | 15  | Strategies for achieving adequate participant enrollment to reach target sample size                                                                                                  | Participants will be recruited from multiple special and primary care level health care providing IPRP for patients with chronic pain.                                                                                                                                                                                                                                                                                                                                                                                                                                                                                                                                                                                                                                                                                                                                                                                                         | Page 8-9, manuscript file |
| Assignment of interventions<br>Allocation sequence generation | 16a | Method of generating the allocation sequence (e.g., computer-generated random numbers), and list of                                                                                   | As sick leave history is a strong predictor for future sick leave (47) participants will be stratified based on self-reported number of sick leave days during the year before IPRP. Participants will be divided in high (total number of gross sick leave days $\geq 70$ ) or low sick leave absence and then randomized to intervention or control group. Allocation of the participants to intervention or control group will be                                                                                                                                                                                                                                                                                                                                                                                                                                                                                                           | Page 10, manuscript file  |

1  
2  
3  
4  
5  
6  
7  
8  
9  
10  
11  
12  
13  
14  
15  
16  
17  
18  
19  
20  
21  
22  
23  
24  
25  
26  
27  
28  
29  
30  
31  
32  
33  
34  
35  
36  
37  
38  
39  
40  
41  
42  
43  
44  
45  
46

|                                  |     |                                                                                                                                                                                                                                                            |                                                                                                                                                                                                                                                                                                                        |                          |
|----------------------------------|-----|------------------------------------------------------------------------------------------------------------------------------------------------------------------------------------------------------------------------------------------------------------|------------------------------------------------------------------------------------------------------------------------------------------------------------------------------------------------------------------------------------------------------------------------------------------------------------------------|--------------------------|
|                                  |     | any factors for stratification. To reduce predictability of a random sequence, details of any planned restriction (e.g., blocking) should be provided in a separate document that is unavailable to those who enroll participants or assign interventions. | conducted using a block randomization design with varying block sizes of 2-6 (48-50). The allocation sequence will be computer generated and sealed sequentially numbered opaque sealed envelopes will be prepared by one of the researchers (GL).                                                                     |                          |
| Allocation concealment mechanism | 16b | Mechanism of implementing the allocation sequence (e.g., central telephone; sequentially numbered, opaque, sealed envelopes), describing any steps to conceal the sequence until interventions are assigned                                                | Sealed sequentially numbered opaque envelopes will be used for implementing the allocation sequence at each participating unit.                                                                                                                                                                                        | Page 10, manuscript file |
| Implementation                   | 16c | Who will generate the allocation sequence, who will enroll participants, and who will assign participants to interventions                                                                                                                                 | The allocation sequence will be generated by a statistician and one of the researchers (GL) will prepare sequentially numbered opaque sealed envelopes. Enrollment and assignment of participants will be performed by one of the researchers (CT) not involved in preparing the allocation sequence or the envelopes. | Page 10, manuscript file |

|                                                                      |     |                                                                                                                                                                                                                                                                                                                |                                                                                                                                                                                                                                                                                                                                                                                                                                                                                         |                          |
|----------------------------------------------------------------------|-----|----------------------------------------------------------------------------------------------------------------------------------------------------------------------------------------------------------------------------------------------------------------------------------------------------------------|-----------------------------------------------------------------------------------------------------------------------------------------------------------------------------------------------------------------------------------------------------------------------------------------------------------------------------------------------------------------------------------------------------------------------------------------------------------------------------------------|--------------------------|
| Blinding                                                             | 17a | Who will be blinded after assignment to interventions (e.g., trial participants, care providers, outcome assessors, data analysts), and how                                                                                                                                                                    | Due to the nature of the intervention the participants will not be blinded to group allocation. As randomization to intervention or control group is performed at the completion of IPRP the participants will not have further contact with the health care staff responsible for IPRP or other patients. The participants will be instructed not to reveal their group allocation to the health care staff responsible for IPRP or other patients if they would have further contact. | Page 11, manuscript file |
|                                                                      | 17b | If blinded, circumstances under which unblinding is permissible, and procedure for revealing a participant's allocated intervention during the trial                                                                                                                                                           | N/A                                                                                                                                                                                                                                                                                                                                                                                                                                                                                     |                          |
| Data collection, management, and analysis<br>Data collection methods | 18a | Plans for assessment and collection of outcome, baseline, and other trial data, including any related processes to promote data quality (e.g., duplicate measurements, training of assessors) and a description of study instruments (e.g., questionnaires, laboratory tests) along with their reliability and | Data collection for the present trial will start when the IPRP is completed (baseline) and at 12 months follow-up (study ending). Data will be collected from the Swedish Social Insurance Agency's SSIA, the SQRP for specialist and primary care level, supplementary questionnaires to the SQRP, and data registered in SWEPPE (table 1).                                                                                                                                            | Page 16, manuscript file |

|                     |     |                                                                                                                                                                                                                                                                      |                                                                                                                                                                                                                                                                                                                                                                                                                       |                             |
|---------------------|-----|----------------------------------------------------------------------------------------------------------------------------------------------------------------------------------------------------------------------------------------------------------------------|-----------------------------------------------------------------------------------------------------------------------------------------------------------------------------------------------------------------------------------------------------------------------------------------------------------------------------------------------------------------------------------------------------------------------|-----------------------------|
|                     |     | validity, if known. Reference to where data collection forms can be found, if not in the protocol.                                                                                                                                                                   |                                                                                                                                                                                                                                                                                                                                                                                                                       |                             |
|                     | 18b | Plans to promote participant retention and complete follow-up, including list of any outcome data to be collected for participants who discontinue or deviate from intervention protocols                                                                            | Data collection for the SQRP is routinely performed when the IPRP is completed and at 12 months follow-up at both primary and specialized care units in Sweden providing IPRP. The supplementary questionnaires will be added to these routine data collections for the SQRP.                                                                                                                                         | Page 16, manuscript file    |
| Data management     | 19  | Plans for data entry, coding, security, and storage, including any related processes to promote data quality (e.g., double data entry; range checks for data values). Reference to where details of data management procedures can be found, if not in the protocol. | A data management plan (DMP) will be developed by the principal investigator and co-workers and will include a description of research data, information about documentation and quality control of research data, storage and back-up copying of research data, legal and ethical aspects, accessibility and long-term preservation of research data, and responsibility and resources related to the research data. | Page 17, manuscript file    |
| Statistical methods | 20a | Statistical methods for analyzing primary and secondary outcomes. Reference to where                                                                                                                                                                                 | A statistical analysis plan will be developed with details of statistical analyses, handling of missing data and other possible analyses for example subgroups. Descriptive statistical analyses will be performed for transparent reporting of participant characteristics. The clinical effectiveness off SWEPEPE will be analysed using                                                                            | Page 17-18, manuscript file |

|                 |     |                                                                                                                                                                                                                                                                                                            |                                                                                                                                                                                                                                                                                                                                |                             |
|-----------------|-----|------------------------------------------------------------------------------------------------------------------------------------------------------------------------------------------------------------------------------------------------------------------------------------------------------------|--------------------------------------------------------------------------------------------------------------------------------------------------------------------------------------------------------------------------------------------------------------------------------------------------------------------------------|-----------------------------|
|                 |     | other details of the statistical analysis plan can be found, if not in the protocol.                                                                                                                                                                                                                       | effect-size and uni- and multivariate statistical analyses as a preliminary plan. Data from SWEPPE will be analysed using repeated measures analyses. All p-values will be presented and a p-value of <0.05 will be considered significant.                                                                                    |                             |
|                 | 20b | Methods for any additional analyses (e.g., subgroup and adjusted analyses)                                                                                                                                                                                                                                 | A statistical analysis plan will be developed with details of statistical analyses, handling of missing data and any additional analyses, for example subgroup and adjusted analyses.                                                                                                                                          | Page 17-18, manuscript file |
|                 | 20c | Definition of analysis population relating to protocol nonadherence (e.g., as-randomized analysis), and any statistical methods to handle missing data (e.g., multiple imputation)                                                                                                                         | Data from primary and secondary outcomes will be analysed according to intention-to-treat.                                                                                                                                                                                                                                     | Page 17-18, manuscript file |
| Data monitoring | 21a | Composition of DMC; summary of its role and reporting structure; statement of whether it is independent from the sponsor and competing interests; and reference to where further details about its charter can be found, if not in the protocol. Alternatively, an explanation of why a DMC is not needed. | All data in the trial will be monitored regularly. Since no sponsors or competing interests exists, monitoring of data will be performed independently. To ensure proper handling and storing of data (structure, organization, file naming), the DMP will be reviewed regularly by the principal investigator and co-workers. | Page 17, manuscript file    |

|                                                      |     |                                                                                                                                                                                   |                                                                                                                                                                                                                                                                                                                                                                                                                                                                                                                   |                             |
|------------------------------------------------------|-----|-----------------------------------------------------------------------------------------------------------------------------------------------------------------------------------|-------------------------------------------------------------------------------------------------------------------------------------------------------------------------------------------------------------------------------------------------------------------------------------------------------------------------------------------------------------------------------------------------------------------------------------------------------------------------------------------------------------------|-----------------------------|
|                                                      | 21b | Description of any interim analyses and stopping guidelines, including who will have access to these interim results and make the final decision to terminate the trial           | N/A                                                                                                                                                                                                                                                                                                                                                                                                                                                                                                               |                             |
| Harms                                                | 22  | Plans for collecting, assessing, reporting, and managing solicited and spontaneously reported adverse events and other unintended effects of trial interventions or trial conduct | SWEPPE can be assumed not to create adverse events and is considered a safe intervention. Nevertheless, all participants will be encouraged to report any adverse events or unintended effects of trial intervention or trial conduct such as unexpected side effects or deterioration of symptoms.                                                                                                                                                                                                               | Page 18, manuscript file    |
| Auditing                                             | 23  | Frequency and procedures for auditing trial conduct, if any, and whether the process will be independent from investigators and the sponsor                                       | To facilitate adherence to the study protocol the project coordinator (CT) will have regular contact (every second week) with the participating units during the study period. Processes to be reviewed are participant screening and eligibility. Documentation of the recruitment and randomization/allocation process, for example eligible patients asked to participate, the number of patients included, excluded or declining participation, performed by CT will be reviewed by the researchers (GL, MB). | Page 18, manuscript file    |
| Ethics and dissemination<br>Research ethics approval | 24  | Plans for seeking REC/IRB approval                                                                                                                                                | The study is approved by the Swedish Ethics Review Board (Dnr 2020-01593, Dnr 2021-01854).                                                                                                                                                                                                                                                                                                                                                                                                                        | Page 18-19, manuscript file |



|                     |     |                                                                                                                                                                                                                                       |                                                                                                                                   |                             |
|---------------------|-----|---------------------------------------------------------------------------------------------------------------------------------------------------------------------------------------------------------------------------------------|-----------------------------------------------------------------------------------------------------------------------------------|-----------------------------|
| Protocol amendments | 25  | Plans for communicating important protocol modifications (e.g., changes to eligibility criteria, outcomes, analyses) to relevant parties (e.g., investigators, RECs/IRBs, trial participants, trial registries, journals, regulators) | Any important modifications of the study protocol will be communicated to the Swedish Ethics Review Board and to the participants | Page 18-19, manuscript file |
| Consent or assent   | 26a | Who will obtain informed consent or assent from potential trial participants or authorized surrogates, and how (see item 32)                                                                                                          | Informed consent will be collected from all participants by one of the researchers (CT). See also the model consent form in S3.   | Page 18, manuscript file.   |
|                     | 26b | Additional consent provisions for collection and use of participant data and biological specimens in ancillary studies, if applicable                                                                                                 | N/A                                                                                                                               |                             |
| Confidentiality     | 27  | How personal information about potential and enrolled participants will be collected, shared, and maintained in order to protect                                                                                                      | Confidentiality will be protected by coding of individual participants' collected data.                                           | Page 18-19, manuscript file |

|                                   |     |                                                                                                                                                                                                 |                                                                                                                                                                                                 |                          |
|-----------------------------------|-----|-------------------------------------------------------------------------------------------------------------------------------------------------------------------------------------------------|-------------------------------------------------------------------------------------------------------------------------------------------------------------------------------------------------|--------------------------|
|                                   |     | confidentiality before, during, and after the trial                                                                                                                                             |                                                                                                                                                                                                 |                          |
| Declaration of interest           | 28  | Financial and other competing interests for principal investigators for the overall trial and each study site                                                                                   | The authors have no competing interests to declare.                                                                                                                                             | Page 19, manuscript file |
| Access to data                    | 29  | Statement of who will have access to the final trial data set, and disclosure of contractual agreements that limit such access for investigators                                                | Data will be stored at a password protected project server at Linköping University and will not be accessed by unauthorized persons.                                                            | Page 19, manuscript file |
| Ancillary and post-treatment care | 30  | Provisions, if any, for ancillary and post-trial care, and for compensation to those who suffer harm from trial participation                                                                   | N/A                                                                                                                                                                                             |                          |
| Dissemination policy              | 31a | Plans for investigators and sponsor to communicate trial results to participants, health care professionals, the public, and other relevant groups (e.g., via publication, reporting in results | The study results will be submitted to peer-review journals for publication and will be presented in national and international research networks, clinical settings, and patient associations. | Page 19, manuscript file |

|                                         |     |                                                                                                                                                                                                |                                                                                                                                                             |                                                           |
|-----------------------------------------|-----|------------------------------------------------------------------------------------------------------------------------------------------------------------------------------------------------|-------------------------------------------------------------------------------------------------------------------------------------------------------------|-----------------------------------------------------------|
|                                         |     | databases, or other data-sharing arrangements), including any publication restrictions                                                                                                         |                                                                                                                                                             |                                                           |
|                                         | 31b | Authorship eligibility guidelines and any intended use of professional writers                                                                                                                 | N/A                                                                                                                                                         |                                                           |
|                                         | 31c | Plans, if any, for granting public access to the full protocol, participant-level data set, and statistical code                                                                               | The study protocol is available via Clinicaltrial.gov. There is no present plan regarding public access of participant-level data set or statistical code.  | Page 18-19, manuscript file                               |
| Appendices<br>Informed consent material | 32  | Model consent form and other related documentation given to participants and authorized surrogates                                                                                             | The consent form is design based on the Swedish Ethics Review Board recommendation and includes written information about the study, supplementary file S3. | Page 18, manuscript file and page 21 in supplemental file |
| Biological specimens                    | 33  | Plans for collection, laboratory evaluation, and storage of biological specimens for genetic or molecular analysis in the current trial and for future use in ancillary studies, if applicable | N/A                                                                                                                                                         |                                                           |

## S2. Overview of the study in relation to the World Health Organization (WHO) trial registration data set.

| WHO item | Item description                              | Study description                                                                                                                                                                                             | Page number where item can be found. |
|----------|-----------------------------------------------|---------------------------------------------------------------------------------------------------------------------------------------------------------------------------------------------------------------|--------------------------------------|
| 1.       | Primary registry and trial identifying number | Primary registry at ClinicalTrials.gov registration number NCT05058547                                                                                                                                        | Page 4, manuscript                   |
| 2.       | Date of registration in primary registry      | 27 September 2021                                                                                                                                                                                             | Page 4, manuscript                   |
| 3.       | Secondary identifying numbers                 | The Swedish Research Council for Health, Working Life and Welfare: Dnr 2019-01264<br>The Swedish Ethics Review Board: Dnr 2020-01593, Dnr 2021-01854                                                          | Page 18-19, manuscript               |
| 4.       | Sources of monetary or material support       | The Swedish Research Council for Health, Working Life and Welfare: Dnr 2019-01264                                                                                                                             | Page 19, manuscript                  |
| 5.       | Primary sponsor                               | Linköping University                                                                                                                                                                                          | Page 1, manuscript                   |
| 6.       | Secondary sponsor(s)                          | N/A                                                                                                                                                                                                           |                                      |
| 7.       | Contact for public queries                    | <a href="mailto:Mathilda.bjork@liu.se">Mathilda.bjork@liu.se</a><br>+4611363531<br>Linköping University<br>581 83 Linköping<br>Sweden<br>Recruitment status: not yet recruiting                               | Page 1, manuscript                   |
| 8.       | Contact for scientific queries                | Mathilda Björk<br><a href="mailto:Mathilda.bjork@liu.se">Mathilda.bjork@liu.se</a><br>+4611363531<br>Department of Health, Medicine and Caring Sciences<br>Linköping University<br>581 83 Linköping<br>Sweden | Page 1, manuscript                   |
| 9.       | Public title                                  | An evidence-based digital support during one year after an Interdisciplinary Pain Rehabilitation Program for persons with chronic musculoskeletal pain to facilitate a                                        | Page 1, manuscript                   |

|     |                                      |                                                                                                                                                                                                                                                                                                                                                                                                                                                                                                                                                                                                                                                                                                                                                                                                                                                                                                                                                                                                                                                                                                                                                                                                        |                       |
|-----|--------------------------------------|--------------------------------------------------------------------------------------------------------------------------------------------------------------------------------------------------------------------------------------------------------------------------------------------------------------------------------------------------------------------------------------------------------------------------------------------------------------------------------------------------------------------------------------------------------------------------------------------------------------------------------------------------------------------------------------------------------------------------------------------------------------------------------------------------------------------------------------------------------------------------------------------------------------------------------------------------------------------------------------------------------------------------------------------------------------------------------------------------------------------------------------------------------------------------------------------------------|-----------------------|
|     |                                      | sustainable return to work: a study protocol for a registry-based multicentre randomized controlled trial.                                                                                                                                                                                                                                                                                                                                                                                                                                                                                                                                                                                                                                                                                                                                                                                                                                                                                                                                                                                                                                                                                             |                       |
| 10. | Scientific title                     | An evidence-based digital support during one year after an Interdisciplinary Pain Rehabilitation Program for persons with chronic musculoskeletal pain to facilitate a sustainable return to work: a study protocol for a registry-based multicentre randomized controlled trial.                                                                                                                                                                                                                                                                                                                                                                                                                                                                                                                                                                                                                                                                                                                                                                                                                                                                                                                      | Page 1, manuscript    |
| 11. | Countries of recruitment             | Sweden                                                                                                                                                                                                                                                                                                                                                                                                                                                                                                                                                                                                                                                                                                                                                                                                                                                                                                                                                                                                                                                                                                                                                                                                 | Page 7, manuscript    |
| 12. | Health condition                     | Chronic pain                                                                                                                                                                                                                                                                                                                                                                                                                                                                                                                                                                                                                                                                                                                                                                                                                                                                                                                                                                                                                                                                                                                                                                                           | Page 7, manuscript    |
| 13. | Intervention                         | <p>Participants randomized to the intervention group will receive the smartphone application SWEPPPE to use as a digital support during the RTW process. SWEPPPE is a smartphone application where the individual can create an action plan, perform daily registrations of health aspects, self-monitoring of health aspects and goals, have access to a library with evidence-based facts and a coach, and possibility to share information with the employer. The intervention starts at the end of the IPRP with self-rating of work conditions and goal setting in SWEPPPE. The participants will use SWEPPPE for 12 months. Data registered in SWEPPPE by the participant about their goal, work condition and self-rating will be stored in the application and used for self-monitoring and visualizing progress for the participant. The participant invites his/her employer/employers to access the web application SWEPPPE depending on what information the participant wants to share with the employer. The employer will receive e-mail reminders to use SWEPPPE.</p> <p>Participants randomized to the control group will not receive any active intervention for RTW after IPRP.</p> | Page 9-10, manuscript |
| 14. | Key inclusion and exclusion criteria | <p>Inclusion Criteria:</p> <p>Patients entering the trial must have completed IPRP<sup>a</sup>. The principal inclusion criteria for IPRP in Sweden are:</p> <ul style="list-style-type: none"> <li>• persistent or intermittent pain lasting <math>\geq 3</math> months</li> <li>• pain affecting daily activities to a large extent,</li> <li>• completed systematic assessment and non-pharmacological optimization is completed,</li> <li>• screening for psychosocial risk factors and differential diagnosis completed</li> </ul> <p>In addition, the following criteria will be applied:</p> <ul style="list-style-type: none"> <li>• Age 18-65 years</li> </ul>                                                                                                                                                                                                                                                                                                                                                                                                                                                                                                                                | Page 8, manuscript    |

|     |                          |                                                                                                                                                                                                                                                                                                                                                                                                                                                                                                                                                                                                                                                                                                                                                                                                                                                                                                                                        |                        |
|-----|--------------------------|----------------------------------------------------------------------------------------------------------------------------------------------------------------------------------------------------------------------------------------------------------------------------------------------------------------------------------------------------------------------------------------------------------------------------------------------------------------------------------------------------------------------------------------------------------------------------------------------------------------------------------------------------------------------------------------------------------------------------------------------------------------------------------------------------------------------------------------------------------------------------------------------------------------------------------------|------------------------|
|     |                          | <ul style="list-style-type: none"> <li>Completed participation in an Interdisciplinary Pain Rehabilitation Program (IPRP) at any of the participating units.</li> <li>Having an employment to return to after IPRP or having returned to work but need continued support for creating a sustainable work situation after IPRP.</li> </ul> <p>Exclusion criteria:</p> <ul style="list-style-type: none"> <li>Completed IPRP but are unemployed or unable to return to work.</li> </ul>                                                                                                                                                                                                                                                                                                                                                                                                                                                  |                        |
| 15. | Study type               | Registry-based randomized controlled trial. Stratification of sick leave history during the year before IPRP and block-randomization, using opaque sealed and numbered envelopes, to intervention (SWEPE) or control group. Due to the nature of the intervention the participants will not be blinded to group allocation.                                                                                                                                                                                                                                                                                                                                                                                                                                                                                                                                                                                                            | Page 7, manuscript     |
| 16. | Date of first enrollment | Anticipated to spring 2022.                                                                                                                                                                                                                                                                                                                                                                                                                                                                                                                                                                                                                                                                                                                                                                                                                                                                                                            | Page 16, manuscript    |
| 17. | Target sample size       | Total number of participants: 360                                                                                                                                                                                                                                                                                                                                                                                                                                                                                                                                                                                                                                                                                                                                                                                                                                                                                                      | Page 11, manuscript    |
| 18. | Recruitment status       | Pending                                                                                                                                                                                                                                                                                                                                                                                                                                                                                                                                                                                                                                                                                                                                                                                                                                                                                                                                | Page 4, manuscript     |
| 19. | Primary outcome(s)       | Sick leave. Time Frame: 12 months follow up after IPRP.<br>Number of gross and net days with sickness cash benefit                                                                                                                                                                                                                                                                                                                                                                                                                                                                                                                                                                                                                                                                                                                                                                                                                     | Page 12, manuscript    |
| 20. | Key secondary outcome(s) | <ol style="list-style-type: none"> <li>Return to work. Time Frame: 12 months follow up after IPRP. Return to work (partially or full time) every month</li> <li>Sick-leave spells per months. Time Frame: 12 months follow up after IPRP. Number of sick-leave spells (per month)</li> <li>Return to work group level. Time Frame: 12 months follow up after IPRP. Proportions of a group who returns to full- or part-time work (per month)</li> <li>Working days before new sick leave. Time Frame: 12 months follow up after IPRP. Number of days in work before new sick leave during study period</li> <li>Proportion back to work. Time Frame: 12 months follow up after IPRP. Proportion of a group back to work &gt;28 days (full- or part time) before a new sick-leave spell occurs</li> <li>Total sick-leave spells. Time Frame: 12 months follow up after IPRP. Number of sick-leave spells during study period</li> </ol> | Page 13-16, manuscript |

|  |  |                                                                                                                                                                                                                                                                                                                                                                                                                                                                                                                                                                                                                                                                                                                                                                                                                                                                                                                                                                                                                                                                                                                                                                                                                                                                                                                                                                                                                                                                                                                                                                                                                                                                                                                                                                                                                                                                                                                                    |  |
|--|--|------------------------------------------------------------------------------------------------------------------------------------------------------------------------------------------------------------------------------------------------------------------------------------------------------------------------------------------------------------------------------------------------------------------------------------------------------------------------------------------------------------------------------------------------------------------------------------------------------------------------------------------------------------------------------------------------------------------------------------------------------------------------------------------------------------------------------------------------------------------------------------------------------------------------------------------------------------------------------------------------------------------------------------------------------------------------------------------------------------------------------------------------------------------------------------------------------------------------------------------------------------------------------------------------------------------------------------------------------------------------------------------------------------------------------------------------------------------------------------------------------------------------------------------------------------------------------------------------------------------------------------------------------------------------------------------------------------------------------------------------------------------------------------------------------------------------------------------------------------------------------------------------------------------------------------|--|
|  |  | <p>7. Length of total sick leave. Time Frame: 12 months follow up after IPRP. Length of total sick leave during study period</p> <p>8. Pain intensity last 7 days. Time Frame: Baseline and 12 months. Numeric pain rating scale.</p> <p>9. Consequences of pain on daily life. Time Frame: Baseline and 12 months. Multidimensional Pain Inventory Swedish version.</p> <p>10. Overall emotional distress. Time Frame: Baseline and 12 months. Hospital Anxiety and Depression Scale Swedish version.</p> <p>11. Physical and mental health. Time Frame: Baseline and 12 months. RAND-36 Swedish version.</p> <p>12. Goal fulfilment and satisfaction during the study period. Time Frame: Baseline and 12 months.</p> <p>Explanatory Outcome Measures:</p> <ol style="list-style-type: none"> <li>1. Self-reported fatigue the last 7 days. Time Frame: Baseline and 12 months. Numeric fatigue rating scale.</li> <li>2. Self-reported insomnia. Time Frame: Baseline and 12 months. Insomnia Severity Index Swedish version.</li> <li>3. Self-reported fear of movement. Time Frame: Baseline and 12 months. Tampa Scale for Kinesiophobia Swedish version.</li> <li>4. Self-reported physical activity. Time Frame: Baseline and 12 months. The National Board of Health and Welfare's three questions on physical activity, exercise, and sedentary behavior.</li> <li>5. Pain catastrophizing. Time Frame: Baseline and 12 months. Pain Catastrophizing scale Swedish version.</li> <li>6. Perceived work ability. Time Frame: Baseline and 12 months. Work Ability Index Swedish version.</li> <li>7. Self-reported demands, control, and support at the workplace. Time Frame: Baseline and 12 months. Demand Control Support Questionnaire Swedish version.</li> <li>8. Self-reported physical work environment using a questionnaire inspired by the Swedish Work Environment Authority ergonomics checklist</li> </ol> |  |
|--|--|------------------------------------------------------------------------------------------------------------------------------------------------------------------------------------------------------------------------------------------------------------------------------------------------------------------------------------------------------------------------------------------------------------------------------------------------------------------------------------------------------------------------------------------------------------------------------------------------------------------------------------------------------------------------------------------------------------------------------------------------------------------------------------------------------------------------------------------------------------------------------------------------------------------------------------------------------------------------------------------------------------------------------------------------------------------------------------------------------------------------------------------------------------------------------------------------------------------------------------------------------------------------------------------------------------------------------------------------------------------------------------------------------------------------------------------------------------------------------------------------------------------------------------------------------------------------------------------------------------------------------------------------------------------------------------------------------------------------------------------------------------------------------------------------------------------------------------------------------------------------------------------------------------------------------------|--|

1  
2  
3  
4  
5  
6  
7  
8  
9  
10  
11  
12  
13  
14  
15  
16  
17  
18  
19  
20  
21  
22  
23  
24  
25  
26  
27  
28  
29  
30  
31  
32  
33  
34  
35  
36  
37  
38  
39  
40  
41  
42  
43  
44  
45  
46

|     |                                                                           |                                                                                                                                                                                                                                                                                                                                                                                                                                                                                                                                                                                                                                                                                                                                                                 |                     |
|-----|---------------------------------------------------------------------------|-----------------------------------------------------------------------------------------------------------------------------------------------------------------------------------------------------------------------------------------------------------------------------------------------------------------------------------------------------------------------------------------------------------------------------------------------------------------------------------------------------------------------------------------------------------------------------------------------------------------------------------------------------------------------------------------------------------------------------------------------------------------|---------------------|
|     |                                                                           | <p>9. Perceived life Satisfaction. Time Frame: Baseline and 12 months. Life satisfaction Scale Swedish version.</p> <p>10. Self-reported work situation during the study period. Time Frame: Baseline and 12 months. Barriers for return to work, strategies to handle barriers and need of support from the employer reported as text answer.</p> <p>11. Self-reported workload an average day. Time Frame: Baseline and 12 months. Number of hours per day for paid work and unpaid household work.</p> <p><b>Data collected from SWEPPE</b><br/>Mobile app usage, for example number of participants using the app, performing daily self-rating, sharing information with the employer, or asking questions to the coach will be retrieved from SWEPPE.</p> |                     |
| 21. | Ethics review                                                             | Approved                                                                                                                                                                                                                                                                                                                                                                                                                                                                                                                                                                                                                                                                                                                                                        | Page 18, manuscript |
| 22. | Completion date                                                           | After the last subject's last visit.                                                                                                                                                                                                                                                                                                                                                                                                                                                                                                                                                                                                                                                                                                                            | Page 16, manuscript |
| 23. | Summary results                                                           | Summary results will be provided when the trial is completed.                                                                                                                                                                                                                                                                                                                                                                                                                                                                                                                                                                                                                                                                                                   | Page 18, manuscript |
| 24. | IPD sharing statement (individual clinical trial participant- level data) | Not planned to share individual clinical trial participant- level data (IPD)                                                                                                                                                                                                                                                                                                                                                                                                                                                                                                                                                                                                                                                                                    | Page 19, manuscript |
